# Supplementary material for: Effects of High-Dose Ionizing Radiation in Human Gene Expression: A Meta-Analysis
Source: PubMed Central journal article supplement (PMC7139561; doi:10.3390/ijms21061938), 2020-03-12
Supplement: ijms-21-01938-s001.pdf [file ijms-21-01938-s001.pdf]

**Supplementary Table S1.** Statistically significant DEGs (Adj.*p*-value<0.05) derived from DGEA of RNA-Seq data from human iPSC-Derived Cardiomyocytes after X-ray irradiation, using DESeq2. The experiment consists of 3 control samples and 3 irradiated with 5 Gy X-ray radiation for 48 hours [Bioproject: PRJNA421022].

| Ensembl ID                  | Gene Symbol | Gene Description                                                               | Adj. <i>p</i> -Value |
|-----------------------------|-------------|--------------------------------------------------------------------------------|----------------------|
| <b>Up-Regulated Genes ↑</b> |             |                                                                                |                      |
| ENSG00000196826             | AC008758.1  | Novel zinc finger protein                                                      | 1.48E-13             |
| ENSG00000163071             | SPATA18     | Spermatogenesis associated 18                                                  | 2.89E-13             |
| ENSG00000173535             | TNFRSF10C   | TNF receptor superfamily member 10c                                            | 2.50E-11             |
| ENSG00000124762             | CDKN1A      | Cyclin dependent kinase inhibitor 1A                                           | 3.30E-09             |
| ENSG00000128271             | ADORA2A     | Adenosine A2a receptor                                                         | 7.41E-09             |
| ENSG00000161513             | FDXR        | Ferredoxin reductase                                                           | 3.25E-07             |
| ENSG00000198211             | AC092143.1  | Novel protein (MC1R-TUBB3 readthrough)                                         | 1.03E-06             |
| ENSG00000270181             | BIVM-ERCC5  | BIVM-ERCC5 readthrough                                                         | 4.30E-06             |
| ENSG00000177106             | EPS8L2      | EPS8 like 2                                                                    | 6.65E-06             |
| ENSG00000080546             | SESN1       | Sestrin 1                                                                      | 7.62E-06             |
| ENSG00000256664             | AC025423.2  | Ribosomal L24 domain containing 1 (RSL24D1) pseudogene                         | 9.78E-06             |
| ENSG00000102935             | ZNF423      | Zinc finger protein 423                                                        | 1.66E-05             |
| ENSG00000135679             | MDM2        | MDM2 proto-oncogene                                                            | 2.63E-05             |
| ENSG00000174307             | PHLDA3      | Pleckstrin homology like domain family A member 3                              | 2.92E-05             |
| ENSG00000225968             | ELFN1       | Extracellular leucine rich repeat and fibronectin type III domain containing 1 | 3.06E-05             |
| ENSG00000244694             | PTCHD4      | Patched domain containing 4                                                    | 8.94E-05             |
| ENSG00000131398             | KCNC3       | Potassium voltage-gated channel subfamily C member 3                           | 9.03E-05             |
| ENSG00000181026             | AEN         | Apoptosis enhancing nuclease                                                   | 0.000143             |
| ENSG00000069188             | SDK2        | Sidekick cell adhesion molecule 2                                              | 0.000209             |
| ENSG00000185088             | RPS27L      | Ribosomal protein S27 like                                                     | 0.000357             |
| ENSG00000166923             | GREM1       | Gremlin 1, DAN family BMP antagonist                                           | 0.000363             |
| ENSG00000196562             | SULF2       | Sulfatase 2                                                                    | 0.000365             |
| ENSG00000130766             | SESN2       | Sestrin 2                                                                      | 0.000467             |
| ENSG00000131080             | EDA2R       | Ectodysplasin A2 receptor                                                      | 0.000562             |
| ENSG00000130517             | PGPEP1      | Pyroglutamyl-peptidase I                                                       | 0.000565             |
| ENSG00000185559             | DLK1        | Delta like non-canonical Notch ligand 1                                        | 0.000604             |
| ENSG00000110900             | TSPAN11     | Tetraspanin 11                                                                 | 0.001129             |
| ENSG00000118971             | CCND2       | Cyclin D2                                                                      | 0.001327             |
| ENSG00000064201             | TSPAN32     | Tetraspanin 32                                                                 | 0.001755             |
| ENSG00000172667             | ZMAT3       | Zinc finger matrin-type 3                                                      | 0.001871             |
| ENSG00000135709             | KIAA0513    | Kiaa0513                                                                       | 0.001996             |
| ENSG00000198753             | PLXNB3      | Plexin B3                                                                      | 0.002337             |
| ENSG00000026103             | FAS         | Fas cell surface death receptor                                                | 0.00256              |
| ENSG00000112249             | ASCC3       | Activating signal cointegrator 1 complex subunit 3                             | 0.002767             |
| ENSG00000177076             | ACER2       | Alkaline ceramidase 2                                                          | 0.002961             |
| ENSG00000130513             | GDF15       | Growth differentiation factor 15                                               | 0.003049             |
| ENSG00000078237             | TIGAR       | TP53 induced glycolysis regulatory phosphatase                                 | 0.003505             |
| ENSG00000156097             | GPR61       | G protein-coupled receptor 61                                                  | 0.004582             |
| ENSG00000251357             | AP000350.4  | Novel protein                                                                  | 0.00497              |
| ENSG00000196557             | CACNA1H     | Calcium voltage-gated channel subunit alpha1 H                                 | 0.005111             |
| ENSG00000105290             | APLP1       | Amyloid beta precursor like protein 1                                          | 0.006093             |

|                               |                |                                                               |           |
|-------------------------------|----------------|---------------------------------------------------------------|-----------|
| ENSG00000244509               | APOBEC3C       | Apolipoprotein B mrna editing enzyme catalytic subunit 3C     | 0.006844  |
| ENSG00000137103               | TMEM8B         | Transmembrane protein 8B                                      | 0.006913  |
| ENSG00000110665               | C11orf21       | Chromosome 11 open reading frame 21                           | 0.008327  |
| ENSG00000167971               | CASKIN1        | CASK interacting protein 1                                    | 0.008441  |
| ENSG00000105327               | BBC3           | BCL2 binding component 3                                      | 0.010488  |
| ENSG00000087088               | BAX            | BCL2 associated X, apoptosis regulator                        | 0.011202  |
| ENSG00000170271               | FAXDC2         | Fatty acid hydroxylase domain containing 2                    | 0.012676  |
| ENSG00000125746               | EML2           | EMAP like 2                                                   | 0.013186  |
| ENSG00000160685               | ZBTB7B         | Zinc finger and BTB domain containing 7B                      | 0.014514  |
| ENSG00000188322               | SBK1           | SH3 domain binding kinase 1                                   | 0.014946  |
| ENSG00000103227               | LMF1           | Lipase maturation factor 1                                    | 0.014951  |
| ENSG00000285188               | AC008397.2     | Camp-specific 3',5'-cyclic phosphodiesterase 4C               | 0.018796  |
| ENSG00000178947               | SMIM10L2A      | Small integral membrane protein 10 like 2A                    | 0.019552  |
| ENSG00000238098               | ABCA17P        | ATP binding cassette subfamily A member 17, pseudogene        | 0.020843  |
| ENSG00000262481               | TMEM256-PLSCR3 | TMEM256-PLSCR3 readthrough (NMD candidate)                    | 0.021436  |
| ENSG00000162643               | WDR63          | WD repeat domain 63                                           | 0.021956  |
| ENSG00000136378               | ADAMTS7        | ADAM metalloproteinase with thrombospondin type 1 motif 7     | 0.023072  |
| ENSG00000158113               | LRRC43         | Leucine rich repeat containing 43                             | 0.024473  |
| ENSG00000170835               | CEL            | Carboxyl ester lipase                                         | 0.025568  |
| ENSG00000138792               | ENPEP          | Glutamyl aminopeptidase                                       | 0.025659  |
| ENSG00000142046               | TMEM91         | Transmembrane protein 91                                      | 0.028467  |
| ENSG00000185650               | ZFP36L1        | ZFP36 ring finger protein like 1                              | 0.030315  |
| ENSG00000172831               | CES2           | Carboxylesterase 2                                            | 0.031055  |
| ENSG00000117016               | RIMS3          | Regulating synaptic membrane exocytosis 3                     | 0.031222  |
| ENSG00000154767               | XPC            | XPC complex subunit, DNA damage recognition and repair factor | 0.031234  |
| ENSG00000100100               | PIK3IP1        | Phosphoinositide-3-kinase interacting protein 1               | 0.033966  |
| ENSG00000102032               | RENBP          | Renin binding protein                                         | 0.034619  |
| ENSG00000013364               | MVP            | Major vault protein                                           | 0.037031  |
| ENSG00000029534               | ANK1           | Ankyrin 1                                                     | 0.04171   |
| ENSG00000184481               | FOXO4          | Forkhead box O4                                               | 0.046386  |
| ENSG00000042445               | RETSAT         | Retinol saturase                                              | 0.046776  |
| ENSG00000174938               | SEZ6L2         | Seizure related 6 homolog like 2                              | 0.047378  |
| <b>Down-Regulated Genes ↓</b> |                |                                                               |           |
| ENSG00000145386               | CCNA2          | Cyclin A2                                                     | 1.01E-161 |
| ENSG00000170312               | CDK1           | Cyclin dependent kinase 1                                     | 1.30E-148 |
| ENSG00000148773               | MKI67          | Marker of proliferation Ki-67                                 | 1.92E-144 |
| ENSG00000024526               | DEPDC1         | DEP domain containing 1                                       | 6.73E-135 |
| ENSG00000203811               | H3C14          | H3 clustered histone 14                                       | 2.21E-134 |
| ENSG00000166851               | PLK1           | Polo like kinase 1                                            | 4.21E-134 |
| ENSG00000171848               | RRM2           | Ribonucleotide reductase regulatory subunit M2                | 4.33E-130 |
| ENSG00000126787               | DLGAP5         | DLG associated protein 5                                      | 2.93E-121 |
| ENSG00000175063               | UBE2C          | Ubiquitin conjugating enzyme E2 C                             | 6.58E-120 |
| ENSG00000112984               | KIF20A         | Kinesin family member 20A                                     | 3.08E-119 |
| ENSG00000168078               | PBK            | PDZ binding kinase                                            | 5.35E-119 |
| ENSG00000157456               | CCNB2          | Cyclin B2                                                     | 1.21E-112 |
| ENSG00000183856               | IQGAP3         | IQ motif containing gtpase activating protein 3               | 1.84E-111 |

|                 |           |                                                                   |           |
|-----------------|-----------|-------------------------------------------------------------------|-----------|
| ENSG00000090889 | KIF4A     | Kinesin family member 4A                                          | 2.97E-111 |
| ENSG00000101447 | FAM83D    | Family with sequence similarity 83 member D                       | 1.82E-110 |
| ENSG00000286522 | H3C2      | H3 clustered histone 2                                            | 1.55E-109 |
| ENSG00000142945 | KIF2C     | Kinesin family member 2C                                          | 7.68E-104 |
| ENSG00000117724 | CENPF     | Centromere protein F                                              | 5.74E-100 |
| ENSG00000101057 | MYBL2     | MYB proto-oncogene like 2                                         | 8.03E-100 |
| ENSG00000169607 | CKAP2L    | Cytoskeleton associated protein 2 like                            | 1.48E-98  |
| ENSG00000094804 | CDC6      | Cell division cycle 6                                             | 1.90E-98  |
| ENSG00000198826 | ARHGAP11A | Rho gtpase activating protein 11A                                 | 2.70E-98  |
| ENSG00000088325 | TPX2      | TPX2 microtubule nucleation factor                                | 3.63E-98  |
| ENSG00000131747 | TOP2A     | DNA topoisomerase II alpha                                        | 1.29E-97  |
| ENSG00000112742 | TTK       | TTK protein kinase                                                | 1.26E-96  |
| ENSG00000121152 | NCAPH     | Non-SMC condensin I complex subunit H                             | 1.44E-95  |
| ENSG00000134690 | CDC48     | Cell division cycle associated 8                                  | 8.76E-94  |
| ENSG00000189057 | FAM111B   | Family with sequence similarity 111 member B                      | 1.39E-91  |
| ENSG00000198901 | PRC1      | Protein regulator of cytokinesis 1                                | 2.25E-90  |
| ENSG00000066279 | ASPM      | Abnormal spindle microtubule assembly                             | 6.02E-89  |
| ENSG00000117650 | NEK2      | NIMA related kinase 2                                             | 1.68E-88  |
| ENSG00000118193 | KIF14     | Kinesin family member 14                                          | 1.79E-86  |
| ENSG00000109805 | NCAPG     | Non-SMC condensin I complex subunit G                             | 2.49E-86  |
| ENSG00000167900 | TK1       | Thymidine kinase 1                                                | 2.24E-85  |
| ENSG00000138180 | CEP55     | Centrosomal protein 55                                            | 2.41E-85  |
| ENSG00000164611 | PTTG1     | PTTG1 regulator of sister chromatid separation, securin           | 4.61E-85  |
| ENSG00000143476 | DTL       | Denticleless E3 ubiquitin protein ligase homolog                  | 1.95E-84  |
| ENSG00000076382 | SPAG5     | Sperm associated antigen 5                                        | 2.24E-84  |
| ENSG00000161800 | RACGAP1   | Rac gtpase activating protein 1                                   | 6.31E-82  |
| ENSG00000134057 | CCNB1     | Cyclin B1                                                         | 6.31E-82  |
| ENSG00000075218 | GTSE1     | G2 and S-phase expressed 1                                        | 1.75E-79  |
| ENSG00000111665 | CDCA3     | Cell division cycle associated 3                                  | 3.42E-79  |
| ENSG00000273983 | H3C8      | H3 clustered histone 8                                            | 1.79E-76  |
| ENSG00000137804 | NUSAP1    | Nucleolar and spindle associated protein 1                        | 1.85E-75  |
| ENSG00000122966 | CIT       | Citron rho-interacting serine/threonine kinase                    | 1.02E-72  |
| ENSG00000129195 | PIMREG    | PICALM interacting mitotic regulator                              | 4.17E-70  |
| ENSG00000138160 | KIF11     | Kinesin family member 11                                          | 2.43E-69  |
| ENSG00000138778 | CENPE     | Centromere protein E                                              | 2.80E-69  |
| ENSG00000065328 | MCM10     | Minichromosome maintenance 10 replication initiation factor       | 4.13E-67  |
| ENSG00000139354 | GAS2L3    | Growth arrest specific 2 like 3                                   | 3.90E-65  |
| ENSG00000068489 | PRR11     | Proline rich 11                                                   | 1.18E-64  |
| ENSG00000164109 | MAD2L1    | Mitotic arrest deficient 2 like 1                                 | 1.18E-64  |
| ENSG00000105011 | ASF1B     | Anti-silencing function 1B histone chaperone                      | 3.04E-64  |
| ENSG00000129810 | SGO1      | Shugoshin 1                                                       | 1.03E-62  |
| ENSG00000143228 | NUF2      | NUF2 component of NDC80 kinetochore complex                       | 2.28E-62  |
| ENSG00000169679 | BUB1      | BUB1 mitotic checkpoint serine/threonine kinase                   | 1.23E-61  |
| ENSG00000186871 | ERCC6L    | ERCC excision repair 6 like, spindle assembly checkpoint helicase | 2.30E-59  |
| ENSG00000167513 | CDT1      | Chromatin licensing and DNA replication factor 1                  | 7.22E-59  |
| ENSG00000171241 | SHCBP1    | SHC binding and spindle associated 1                              | 1.72E-58  |
| ENSG00000108106 | UBE2S     | Ubiquitin conjugating enzyme E2 S                                 | 6.65E-57  |
| ENSG00000175305 | CCNE2     | Cyclin E2                                                         | 9.61E-57  |
| ENSG00000186193 | SAPCD2    | Suppressor APC domain containing 2                                | 2.49E-55  |

|                 |            |                                                      |          |
|-----------------|------------|------------------------------------------------------|----------|
| ENSG00000115163 | CENPA      | Centromere protein A                                 | 1.01E-53 |
| ENSG00000092853 | CLSPN      | Claspin                                              | 5.80E-53 |
| ENSG00000100297 | MCM5       | Minichromosome maintenance complex component 5       | 1.42E-52 |
| ENSG00000121621 | KIF18A     | Kinesin family member 18A                            | 1.46E-51 |
| ENSG00000122952 | ZWINT      | ZW10 interacting kinetochore protein                 | 3.76E-51 |
| ENSG00000158402 | CDC25C     | Cell division cycle 25C                              | 1.07E-50 |
| ENSG00000111247 | RAD51AP1   | RAD51 associated protein 1                           | 1.68E-50 |
| ENSG00000135451 | TROAP      | Trophinin associated protein                         | 1.73E-50 |
| ENSG00000186185 | KIF18B     | Kinesin family member 18B                            | 4.42E-50 |
| ENSG00000137807 | KIF23      | Kinesin family member 23                             | 1.07E-49 |
| ENSG00000123485 | HJURP      | Holliday junction recognition protein                | 9.76E-49 |
| ENSG00000136122 | BORA       | BORA aurora kinase A activator                       | 1.39E-48 |
| ENSG00000165490 | DDIAS      | DNA damage induced apoptosis suppressor              | 2.80E-48 |
| ENSG00000146670 | CDCA5      | Cell division cycle associated 5                     | 2.15E-47 |
| ENSG00000035499 | DEPDC1B    | DEP domain containing 1B                             | 2.60E-47 |
| ENSG00000178999 | AURKB      | Aurora kinase B                                      | 1.99E-46 |
| ENSG00000276043 | UHRF1      | Ubiquitin like with PHD and ring finger domains 1    | 2.18E-46 |
| ENSG00000274641 | H2BC17     | H2B clustered histone 17                             | 2.61E-46 |
| ENSG00000165304 | MELK       | Maternal embryonic leucine zipper kinase             | 2.82E-46 |
| ENSG00000161888 | SPC24      | SPC24 component of NDC80 kinetochore complex         | 4.48E-45 |
| ENSG00000089685 | BIRC5      | Baculoviral IAP repeat containing 5                  | 7.07E-45 |
| ENSG00000174371 | EXO1       | Exonuclease 1                                        | 1.65E-44 |
| ENSG00000111206 | FOXM1      | Forkhead box M1                                      | 8.33E-44 |
| ENSG00000274997 | H2AC12     | H2A clustered histone 12                             | 1.03E-43 |
| ENSG00000093009 | CDC45      | Cell division cycle 45                               | 1.43E-43 |
| ENSG00000184357 | H1-5       | H1.5 linker histone, cluster member                  | 4.58E-43 |
| ENSG00000119969 | HELLS      | Helicase, lymphoid specific                          | 6.16E-43 |
| ENSG00000123080 | CDKN2C     | Cyclin dependent kinase inhibitor 2C                 | 7.48E-43 |
| ENSG00000156970 | BUB1B      | BUB1 mitotic checkpoint serine/threonine kinase B    | 9.01E-43 |
| ENSG00000166803 | PCLAF      | PCNA clamp associated factor                         | 1.39E-42 |
| ENSG00000100526 | CDKN3      | Cyclin dependent kinase inhibitor 3                  | 1.97E-42 |
| ENSG00000182010 | RTKN2      | Rhotekin 2                                           | 6.20E-42 |
| ENSG00000014138 | POLA2      | DNA polymerase alpha 2, accessory subunit            | 1.36E-41 |
| ENSG00000185480 | PARPBP     | PARP1 binding protein                                | 1.66E-41 |
| ENSG00000137812 | KNL1       | Kinetochore scaffold 1                               | 1.00E-40 |
| ENSG00000080986 | NDC80      | NDC80 kinetochore complex component                  | 5.33E-40 |
| ENSG00000165480 | SKA3       | Spindle and kinetochore associated complex subunit 3 | 5.33E-40 |
| ENSG00000164087 | POC1A      | POC1 centriolar protein A                            | 1.17E-39 |
| ENSG00000276368 | H2AC14     | H2A clustered histone 14                             | 1.64E-39 |
| ENSG00000175643 | RMI2       | Recq mediated genome instability 2                   | 1.92E-39 |
| ENSG00000259316 | AC087632.2 | Novel protein                                        | 2.51E-39 |
| ENSG00000196787 | H2AC11     | H2A clustered histone 11                             | 2.96E-39 |
| ENSG00000146918 | NCAPG2     | Non-SMC condensin II complex subunit G2              | 7.41E-39 |
| ENSG00000138182 | KIF20B     | Kinesin family member 20B                            | 2.10E-38 |
| ENSG00000177602 | HASPIN     | Histone H3 associated protein kinase                 | 2.17E-38 |
| ENSG00000188486 | H2AX       | H2A.X variant histone                                | 4.82E-38 |
| ENSG00000182481 | KPNA2      | Karyopherin subunit alpha 2                          | 5.92E-38 |
| ENSG00000109674 | NEIL3      | Nei like DNA glycosylase 3                           | 9.07E-38 |
| ENSG00000092470 | WDR76      | WD repeat domain 76                                  | 4.57E-37 |
| ENSG00000278588 | H2BC10     | H2B clustered histone 10                             | 1.81E-36 |
| ENSG00000071539 | TRIP13     | Thyroid hormone receptor interactor 13               | 1.98E-36 |

|                 |            |                                                                   |          |
|-----------------|------------|-------------------------------------------------------------------|----------|
| ENSG00000171320 | ESCO2      | Establishment of sister chromatid cohesion N-acetyltransferase 2  | 5.27E-36 |
| ENSG00000077152 | UBE2T      | Ubiquitin conjugating enzyme E2 T                                 | 5.99E-36 |
| ENSG00000011426 | ANLN       | Anillin actin binding protein                                     | 6.42E-36 |
| ENSG00000137310 | TCF19      | Transcription factor 19                                           | 3.43E-35 |
| ENSG00000196747 | H2AC13     | H2A clustered histone 13                                          | 1.90E-34 |
| ENSG00000124635 | H2BC11     | H2B clustered histone 11                                          | 8.04E-34 |
| ENSG00000007968 | E2F2       | E2F transcription factor 2                                        | 5.74E-33 |
| ENSG00000142731 | PLK4       | Polo like kinase 4                                                | 6.32E-33 |
| ENSG00000102384 | CENPI      | Centromere protein I                                              | 1.19E-32 |
| ENSG00000104147 | OIP5       | Opa interacting protein 5                                         | 1.33E-32 |
| ENSG00000139618 | BRCA2      | BRCA2 DNA repair associated                                       | 2.60E-32 |
| ENSG00000121211 | MND1       | Meiotic nuclear divisions 1                                       | 5.32E-32 |
| ENSG00000197153 | H3C12      | H3 clustered histone 12                                           | 7.56E-32 |
| ENSG00000170540 | ARL6IP1    | ADP ribosylation factor like gtpase 6 interacting protein 1       | 2.14E-31 |
| ENSG00000100162 | CENPM      | Centromere protein M                                              | 9.49E-31 |
| ENSG00000135476 | ESPL1      | Extra spindle pole bodies like 1, separase                        | 1.52E-30 |
| ENSG00000087586 | AURKA      | Aurora kinase A                                                   | 5.61E-30 |
| ENSG00000172244 | C5orf34    | Chromosome 5 open reading frame 34                                | 8.35E-30 |
| ENSG00000277775 | H3C7       | H3 clustered histone 7                                            | 7.29E-29 |
| ENSG00000136982 | DSCC1      | DNA replication and sister chromatid cohesion 1                   | 1.10E-28 |
| ENSG00000166845 | C18orf54   | Chromosome 18 open reading frame 54                               | 1.12E-28 |
| ENSG00000113810 | SMC4       | Structural maintenance of chromosomes 4                           | 1.77E-28 |
| ENSG00000112029 | FBXO5      | F-box protein 5                                                   | 2.24E-28 |
| ENSG00000121957 | GPSM2      | G protein signaling modulator 2                                   | 2.24E-28 |
| ENSG00000144554 | FANCD2     | FA complementation group D2                                       | 2.37E-28 |
| ENSG00000167670 | CHAF1A     | Chromatin assembly factor 1 subunit A                             | 3.43E-28 |
| ENSG00000282988 | AL031777.2 | Novel protein                                                     | 3.70E-28 |
| ENSG00000153044 | CENPH      | Centromere protein H                                              | 1.06E-27 |
| ENSG00000163507 | CIP2A      | Cell proliferation regulating inhibitor of protein phosphatase 2A | 1.06E-27 |
| ENSG00000278677 | H2AC17     | H2A clustered histone 17                                          | 3.60E-27 |
| ENSG00000131153 | GIN5       | GIN5 complex subunit 2                                            | 8.28E-27 |
| ENSG00000151725 | CENPU      | Centromere protein U                                              | 1.60E-26 |
| ENSG00000073111 | MCM2       | Minichromosome maintenance complex component 2                    | 4.28E-26 |
| ENSG00000140525 | FANCI      | FA complementation group I                                        | 8.75E-26 |
| ENSG00000168496 | FEN1       | Flap structure-specific endonuclease 1                            | 8.78E-26 |
| ENSG00000076003 | MCM6       | Minichromosome maintenance complex component 6                    | 1.19E-25 |
| ENSG00000072571 | HMMR       | Hyaluronan mediated motility receptor                             | 1.69E-25 |
| ENSG00000173207 | CKS1B      | CDC28 protein kinase regulatory subunit 1B                        | 4.45E-25 |
| ENSG00000101224 | CDC25B     | Cell division cycle 25B                                           | 5.02E-25 |
| ENSG00000165244 | ZNF367     | Zinc finger protein 367                                           | 5.57E-25 |
| ENSG00000117399 | CDC20      | Cell division cycle 20                                            | 6.80E-25 |
| ENSG00000111602 | TIMELESS   | Timeless circadian regulator                                      | 1.52E-24 |
| ENSG00000270882 | H4C14      | H4 clustered histone 14                                           | 2.06E-24 |
| ENSG00000213186 | TRIM59     | Tripartite motif containing 59                                    | 3.64E-24 |
| ENSG00000275713 | H2BC9      | H2B clustered histone 9                                           | 5.65E-24 |
| ENSG00000051180 | RAD51      | RAD51 recombinase                                                 | 6.61E-24 |
| ENSG00000188610 | FAM72B     | Family with sequence similarity 72 member B                       | 1.16E-23 |
| ENSG00000101003 | GIN5       | GIN5 complex subunit 1                                            | 1.31E-23 |
| ENSG00000127564 | PKMYT1     | Protein kinase, membrane associated tyrosine/threonine 1          | 1.32E-23 |

|                 |            |                                                           |          |
|-----------------|------------|-----------------------------------------------------------|----------|
| ENSG00000278463 | H2AC4      | H2A clustered histone 4                                   | 1.87E-23 |
| ENSG00000147536 | GINS4      | GINS complex subunit 4                                    | 2.49E-23 |
| ENSG00000164045 | CDC25A     | Cell division cycle 25A                                   | 6.68E-23 |
| ENSG00000133119 | RFC3       | Replication factor C subunit 3                            | 9.48E-23 |
| ENSG00000203760 | CENPW      | Centromere protein W                                      | 9.58E-23 |
| ENSG00000113368 | LMNB1      | Lamin B1                                                  | 1.08E-22 |
| ENSG00000284946 | AC068831.8 | Novel protein                                             | 1.25E-22 |
| ENSG00000197472 | ZNF695     | Zinc finger protein 695                                   | 1.51E-22 |
| ENSG00000274750 | H3C6       | H3 clustered histone 6                                    | 2.00E-22 |
| ENSG00000085840 | ORC1       | Origin recognition complex subunit 1                      | 3.74E-22 |
| ENSG00000154760 | SLFN13     | Schlafen family member 13                                 | 5.58E-22 |
| ENSG00000164104 | HMGB2      | High mobility group box 2                                 | 1.76E-21 |
| ENSG00000013810 | TACC3      | Transforming acidic coiled-coil containing protein 3      | 1.94E-21 |
| ENSG00000144354 | CDCA7      | Cell division cycle associated 7                          | 2.07E-21 |
| ENSG00000186638 | KIF24      | Kinesin family member 24                                  | 4.38E-21 |
| ENSG00000164032 | H2AZ1      | H2A.Z variant histone 1                                   | 4.87E-21 |
| ENSG00000213347 | MXD3       | MAX dimerization protein 3                                | 6.81E-21 |
| ENSG00000097046 | CDC7       | Cell division cycle 7                                     | 9.48E-21 |
| ENSG00000051341 | POLQ       | DNA polymerase theta                                      | 9.54E-21 |
| ENSG00000285920 | AC087721.2 | Novel protein                                             | 1.01E-20 |
| ENSG00000166801 | FAM111A    | Family with sequence similarity 111 member A              | 1.04E-20 |
| ENSG00000005189 | REXO5      | RNA exonuclease 5                                         | 1.95E-20 |
| ENSG00000215784 | FAM72D     | Family with sequence similarity 72 member D               | 4.10E-20 |
| ENSG00000176890 | TYMS       | Thymidylate synthetase                                    | 4.68E-20 |
| ENSG00000127423 | AUNIP      | Aurora kinase A and ninein interacting protein            | 9.66E-20 |
| ENSG00000162063 | CCNF       | Cyclin F                                                  | 1.02E-19 |
| ENSG00000273703 | H2BC14     | H2B clustered histone 14                                  | 2.25E-19 |
| ENSG00000117632 | STMN1      | Stathmin 1                                                | 2.80E-19 |
| ENSG00000276903 | H2AC16     | H2A clustered histone 16                                  | 3.02E-19 |
| ENSG00000163535 | SGO2       | Shugoshin 2                                               | 3.58E-19 |
| ENSG00000171208 | NETO2      | Neuropilin and tolloid like 2                             | 4.32E-19 |
| ENSG00000174442 | ZWILCH     | Zwilch kinetochore protein                                | 6.40E-19 |
| ENSG00000123473 | STIL       | STIL centriolar assembly protein                          | 6.93E-19 |
| ENSG00000274290 | H2BC6      | H2B clustered histone 6                                   | 7.07E-19 |
| ENSG00000158164 | TMSB15A    | Thymosin beta 15a                                         | 8.21E-19 |
| ENSG00000176244 | ACBD7      | Acyl-coa binding domain containing 7                      | 1.03E-18 |
| ENSG00000123219 | CENPK      | Centromere protein K                                      | 1.35E-18 |
| ENSG00000134222 | PSRC1      | Proline and serine rich coiled-coil 1                     | 1.41E-18 |
| ENSG00000006634 | DBF4       | DBF4 zinc finger                                          | 1.94E-18 |
| ENSG00000214357 | NEURL1B    | Neutralized E3 ubiquitin protein ligase 1B                | 2.09E-18 |
| ENSG00000100479 | POLE2      | DNA polymerase epsilon 2, accessory subunit               | 2.40E-18 |
| ENSG00000123975 | CKS2       | CDC28 protein kinase regulatory subunit 2                 | 2.64E-18 |
| ENSG00000120802 | TMPO       | Thymopoietin                                              | 3.21E-18 |
| ENSG00000076770 | MBNL3      | Muscleblind like splicing regulator 3                     | 3.32E-18 |
| ENSG00000138092 | CENPO      | Centromere protein O                                      | 3.39E-18 |
| ENSG00000197299 | BLM        | BLM recq like helicase                                    | 4.91E-18 |
| ENSG00000123374 | CDK2       | Cyclin dependent kinase 2                                 | 6.77E-18 |
| ENSG00000106462 | EZH2       | Enhancer of zeste 2 polycomb repressive complex 2 subunit | 1.64E-17 |
| ENSG00000136492 | BRIP1      | BRCA1 interacting protein C-terminal helicase 1           | 2.46E-17 |
| ENSG00000159259 | CHAF1B     | Chromatin assembly factor 1 subunit B                     | 2.46E-17 |

|                 |            |                                                         |          |
|-----------------|------------|---------------------------------------------------------|----------|
| ENSG00000275591 | XKR5       | XK related 5                                            | 2.91E-17 |
| ENSG00000198554 | WDHD1      | WD repeat and HMG-box DNA binding protein 1             | 1.67E-16 |
| ENSG00000183598 | H3C13      | H3 clustered histone 13                                 | 2.49E-16 |
| ENSG00000163918 | RFC4       | Replication factor C subunit 4                          | 5.24E-16 |
| ENSG00000128944 | KNSTRN     | Kinetochoe localized astrin (SPAG5) binding protein     | 6.57E-16 |
| ENSG00000148019 | CEP78      | Centrosomal protein 78                                  | 2.70E-15 |
| ENSG00000131470 | PSMC3IP    | PSMC3 interacting protein                               | 3.76E-15 |
| ENSG00000197061 | H4C3       | H4 clustered histone 3                                  | 5.36E-15 |
| ENSG00000163808 | KIF15      | Kinesin family member 15                                | 7.93E-15 |
| ENSG00000137563 | GGH        | Gamma-glutamyl hydrolase                                | 8.11E-15 |
| ENSG00000102098 | SCML2      | Scm polycomb group protein like 2                       | 8.39E-15 |
| ENSG00000185130 | H2BC13     | H2B clustered histone 13                                | 8.82E-15 |
| ENSG00000100629 | CEP128     | Centrosomal protein 128                                 | 1.96E-14 |
| ENSG00000149503 | INCENP     | Inner centromere protein                                | 2.09E-14 |
| ENSG00000168393 | DTYMK      | Deoxythymidylate kinase                                 | 2.16E-14 |
| ENSG00000278637 | H4C1       | H4 clustered histone 1                                  | 2.19E-14 |
| ENSG00000149636 | DSN1       | DSN1 component of MIS12 kinetochoe complex              | 2.64E-14 |
| ENSG00000183850 | ZNF730     | Zinc finger protein 730                                 | 4.00E-14 |
| ENSG00000167325 | RRM1       | Ribonucleotide reductase catalytic subunit M1           | 5.63E-14 |
| ENSG00000137135 | ARHGEF39   | Rho guanine nucleotide exchange factor 39               | 6.14E-14 |
| ENSG00000204899 | MZT1       | Mitotic spindle organizing protein 1                    | 6.60E-14 |
| ENSG00000186777 | ZNF732     | Zinc finger protein 732                                 | 7.09E-14 |
| ENSG00000156876 | SASS6      | SAS-6 centriolar assembly protein                       | 9.14E-14 |
| ENSG00000112118 | MCM3       | Minichromosome maintenance complex component 3          | 1.01E-13 |
| ENSG00000183763 | TRAIIP     | TRAF interacting protein                                | 1.16E-13 |
| ENSG00000149554 | CHEK1      | Checkpoint kinase 1                                     | 1.17E-13 |
| ENSG00000168411 | RFWD3      | Ring finger and WD repeat domain 3                      | 1.34E-13 |
| ENSG00000101412 | E2F1       | E2F transcription factor 1                              | 1.55E-13 |
| ENSG00000185697 | MYBL1      | MYB proto-oncogene like 1                               | 2.09E-13 |
| ENSG00000196550 | FAM72A     | Family with sequence similarity 72 member A             | 4.90E-13 |
| ENSG00000079616 | KIF22      | Kinesin family member 22                                | 5.11E-13 |
| ENSG00000049541 | RFC2       | Replication factor C subunit 2                          | 5.58E-13 |
| ENSG00000283559 | AC139491.6 | Centrosomal protein 192kda (CEP192) pseudogene          | 5.66E-13 |
| ENSG00000160957 | RECQL4     | Recq like helicase 4                                    | 5.91E-13 |
| ENSG00000122483 | CCDC18     | Coiled-coil domain containing 18                        | 7.76E-13 |
| ENSG00000187741 | FANCA      | FA complementation group A                              | 8.96E-13 |
| ENSG00000277157 | H4C4       | H4 clustered histone 4                                  | 1.40E-12 |
| ENSG00000120539 | MASTL      | Microtubule associated serine/threonine kinase like     | 1.53E-12 |
| ENSG00000156802 | ATAD2      | Atpase family AAA domain containing 2                   | 2.15E-12 |
| ENSG00000146143 | PRIM2      | DNA primase subunit 2                                   | 2.68E-12 |
| ENSG00000129534 | MIS18BP1   | MIS18 binding protein 1                                 | 3.66E-12 |
| ENSG00000186767 | SPIN4      | Spindlin family member 4                                | 4.11E-12 |
| ENSG00000221829 | FANCG      | FA complementation group G                              | 7.18E-12 |
| ENSG00000140534 | TICRR      | TOPBP1 interacting checkpoint and replication regulator | 7.36E-12 |
| ENSG00000196584 | XRCC2      | X-ray repair cross complementing 2                      | 1.26E-11 |
| ENSG00000100749 | VRK1       | VRK serine/threonine kinase 1                           | 1.92E-11 |
| ENSG00000114346 | ECT2       | Epithelial cell transforming 2                          | 2.48E-11 |
| ENSG00000119403 | PHF19      | PHD finger protein 19                                   | 3.06E-11 |
| ENSG00000196866 | H2AC7      | H2A clustered histone 7                                 | 3.29E-11 |
| ENSG00000156136 | DCK        | Deoxycytidine kinase                                    | 3.58E-11 |
| ENSG00000277075 | H2AC8      | H2A clustered histone 8                                 | 3.90E-11 |

|                 |           |                                                                     |          |
|-----------------|-----------|---------------------------------------------------------------------|----------|
| ENSG00000124575 | H1-3      | H1.3 linker histone, cluster member                                 | 4.22E-11 |
| ENSG00000275714 | H3C1      | H3 clustered histone 1                                              | 4.57E-11 |
| ENSG00000146410 | MTFR2     | Mitochondrial fission regulator 2                                   | 4.73E-11 |
| ENSG00000170779 | CDCA4     | Cell division cycle associated 4                                    | 4.87E-11 |
| ENSG00000092140 | G2E3      | G2/M-phase specific E3 ubiquitin protein ligase                     | 6.24E-11 |
| ENSG00000198830 | HMGN2     | High mobility group nucleosomal binding domain 2                    | 7.07E-11 |
| ENSG00000125885 | MCM8      | Minichromosome maintenance 8 homologous recombination repair factor | 7.32E-11 |
| ENSG00000166881 | NEMP1     | Nuclear envelope integral membrane protein 1                        | 8.09E-11 |
| ENSG00000103995 | CEP152    | Centrosomal protein 152                                             | 1.01E-10 |
| ENSG00000176208 | ATAD5     | Atpase family AAA domain containing 5                               | 1.31E-10 |
| ENSG00000171792 | RHNO1     | RAD9-HUS1-RAD1 interacting nuclear orphan 1                         | 1.36E-10 |
| ENSG00000278828 | H3C10     | H3 clustered histone 10                                             | 1.44E-10 |
| ENSG00000154920 | EME1      | Essential meiotic structure-specific endonuclease 1                 | 2.45E-10 |
| ENSG00000101945 | SUV39H1   | Suppressor of variegation 3-9 homolog 1                             | 2.92E-10 |
| ENSG00000234289 | H2BS1     | H2B.S histone 1                                                     | 2.97E-10 |
| ENSG00000166508 | MCM7      | Minichromosome maintenance complex component 7                      | 3.91E-10 |
| ENSG00000115159 | GPD2      | Glycerol-3-phosphate dehydrogenase 2                                | 4.38E-10 |
| ENSG00000132436 | FIGNL1    | Fidgetin like 1                                                     | 4.84E-10 |
| ENSG00000160298 | C21orf58  | Chromosome 21 open reading frame 58                                 | 5.63E-10 |
| ENSG00000151849 | CENPJ     | Centromere protein J                                                | 5.92E-10 |
| ENSG00000112877 | CEP72     | Centrosomal protein 72                                              | 7.62E-10 |
| ENSG00000198056 | PRIM1     | DNA primase subunit 1                                               | 8.00E-10 |
| ENSG00000284491 | THSD8     | Thrombospondin type 1 domain containing 8                           | 1.00E-09 |
| ENSG00000185361 | TNFAIP8L1 | TNF alpha induced protein 8 like 1                                  | 1.13E-09 |
| ENSG00000180596 | H2BC4     | H2B clustered histone 4                                             | 2.85E-09 |
| ENSG00000040275 | SPDL1     | Spindle apparatus coiled-coil protein 1                             | 3.08E-09 |
| ENSG00000277224 | H2BC7     | H2B clustered histone 7                                             | 3.51E-09 |
| ENSG00000146263 | MMS22L    | MMS22 like, DNA repair protein                                      | 4.58E-09 |
| ENSG00000112312 | GMNN      | Geminin DNA replication inhibitor                                   | 5.01E-09 |
| ENSG00000205208 | C4orf46   | Chromosome 4 open reading frame 46                                  | 5.63E-09 |
| ENSG00000166451 | CENPN     | Centromere protein N                                                | 7.63E-09 |
| ENSG00000172167 | MTBP      | MDM2 binding protein                                                | 1.10E-08 |
| ENSG00000163923 | RPL39L    | Ribosomal protein L39 like                                          | 1.12E-08 |
| ENSG00000187123 | LYPD6     | LY6/PLAUR domain containing 6                                       | 1.17E-08 |
| ENSG00000120334 | CENPL     | Centromere protein L                                                | 1.55E-08 |
| ENSG00000133101 | CCNA1     | Cyclin A1                                                           | 2.03E-08 |
| ENSG00000115687 | PASK      | PAS domain containing serine/threonine kinase                       | 2.73E-08 |
| ENSG00000197238 | H4C11     | H4 clustered histone 11                                             | 3.80E-08 |
| ENSG00000080839 | RBL1      | RB transcriptional corepressor like 1                               | 4.03E-08 |
| ENSG00000188312 | CENPP     | Centromere protein P                                                | 4.20E-08 |
| ENSG00000167747 | C19orf48  | Chromosome 19 open reading frame 48                                 | 4.54E-08 |
| ENSG00000064199 | SPA17     | Sperm autoantigenic protein 17                                      | 5.23E-08 |
| ENSG00000198331 | HYLS1     | HYLS1 centriolar and ciliogenesis associated                        | 6.75E-08 |
| ENSG00000126215 | XRCC3     | X-ray repair cross complementing 3                                  | 7.28E-08 |
| ENSG00000158406 | H4C8      | H4 clustered histone 8                                              | 7.29E-08 |
| ENSG00000031691 | CENPQ     | Centromere protein Q                                                | 7.30E-08 |
| ENSG00000115392 | FANCL     | FA complementation group L                                          | 8.50E-08 |
| ENSG00000189403 | HMGB1     | High mobility group box 1                                           | 1.10E-07 |
| ENSG00000278705 | H4C2      | H4 clustered histone 2                                              | 1.15E-07 |
| ENSG00000276180 | H4C9      | H4 clustered histone 9                                              | 1.17E-07 |



|                 |           |                                                                            |          |
|-----------------|-----------|----------------------------------------------------------------------------|----------|
| ENSG00000123136 | DDX39A    | Dexd-box helicase 39A                                                      | 1.17E-07 |
| ENSG00000181544 | FANCB     | FA complementation group B                                                 | 1.21E-07 |
| ENSG00000228716 | DHFR      | Dihydrofolate reductase                                                    | 1.21E-07 |
| ENSG00000006047 | YBX2      | Y-box binding protein 2                                                    | 1.30E-07 |
| ENSG00000136943 | CTSV      | Cathepsin V                                                                | 1.32E-07 |
| ENSG00000273802 | H2BC8     | H2B clustered histone 8                                                    | 1.41E-07 |
| ENSG00000237649 | KIFC1     | Kinesin family member C1                                                   | 1.52E-07 |
| ENSG00000160949 | TONSL     | Tonsoku like, DNA repair protein                                           | 1.71E-07 |
| ENSG00000175175 | PPM1E     | Protein phosphatase, Mg <sup>2+</sup> /Mn <sup>2+</sup> dependent 1E       | 1.82E-07 |
| ENSG00000128245 | YWHAH     | Tyrosine 3-monooxygenase/tryptophan 5-monooxygenase activation protein eta | 2.30E-07 |
| ENSG00000197275 | RAD54B    | RAD54 homolog B                                                            | 2.39E-07 |
| ENSG00000154839 | SKA1      | Spindle and kinetochore associated complex subunit 1                       | 2.58E-07 |
| ENSG00000133863 | TEX15     | Testis expressed 15, meiosis and synapsis associated                       | 2.72E-07 |
| ENSG00000127337 | YEATS4    | YEATS domain containing 4                                                  | 2.79E-07 |
| ENSG00000275379 | H3C11     | H3 clustered histone 11                                                    | 2.84E-07 |
| ENSG00000145832 | SLC25A48  | Solute carrier family 25 member 48                                         | 3.01E-07 |
| ENSG00000138346 | DNA2      | DNA replication helicase/nuclease 2                                        | 3.14E-07 |
| ENSG00000162607 | USP1      | Ubiquitin specific peptidase 1                                             | 3.89E-07 |
| ENSG00000285077 | ARHGAP11B | Rho gtpase activating protein 11B                                          | 4.16E-07 |
| ENSG00000144395 | CCDC150   | Coiled-coil domain containing 150                                          | 4.21E-07 |
| ENSG00000105486 | LIG1      | DNA ligase 1                                                               | 4.25E-07 |
| ENSG00000159055 | MIS18A    | MIS18 kinetochore protein A                                                | 4.37E-07 |
| ENSG00000180198 | RCC1      | Regulator of chromosome condensation 1                                     | 4.72E-07 |
| ENSG00000135045 | C9orf40   | Chromosome 9 open reading frame 40                                         | 4.81E-07 |
| ENSG00000077264 | PAK3      | P21 (RAC1) activated kinase 3                                              | 4.90E-07 |
| ENSG00000167553 | TUBA1C    | Tubulin alpha 1c                                                           | 4.90E-07 |
| ENSG00000143815 | LBR       | Lamin B receptor                                                           | 4.90E-07 |
| ENSG00000124795 | DEK       | DEK proto-oncogene                                                         | 7.52E-07 |
| ENSG00000138376 | BARD1     | BRCA1 associated RING domain 1                                             | 7.86E-07 |
| ENSG00000233822 | H2BC15    | H2B clustered histone 15                                                   | 8.68E-07 |
| ENSG00000152503 | TRIM36    | Tripartite motif containing 36                                             | 9.65E-07 |
| ENSG00000131773 | KHDRBS3   | KH RNA binding domain containing, signal transduction associated 3         | 9.83E-07 |
| ENSG00000131351 | HAUS8     | HAUS augmin like complex subunit 8                                         | 1.01E-06 |
| ENSG00000109084 | TMEM97    | Transmembrane protein 97                                                   | 1.01E-06 |
| ENSG00000140451 | PIF1      | PIF1 5'-to-3' DNA helicase                                                 | 1.07E-06 |
| ENSG00000197903 | H2BC12    | H2B clustered histone 12                                                   | 1.17E-06 |
| ENSG00000196247 | ZNF107    | Zinc finger protein 107                                                    | 1.18E-06 |
| ENSG00000189159 | JPT1      | Jupiter microtubule associated homolog 1                                   | 1.24E-06 |
| ENSG00000111445 | RFC5      | Replication factor C subunit 5                                             | 1.44E-06 |
| ENSG00000178966 | RMI1      | Recq mediated genome instability 1                                         | 1.46E-06 |
| ENSG00000135407 | AVIL      | Advillin                                                                   | 1.68E-06 |
| ENSG00000163781 | TOPBP1    | DNA topoisomerase II binding protein 1                                     | 1.69E-06 |
| ENSG00000072864 | NDE1      | Nude neurodevelopment protein 1                                            | 2.08E-06 |
| ENSG00000154473 | BUB3      | BUB3 mitotic checkpoint protein                                            | 2.09E-06 |
| ENSG00000119397 | CNTRL     | Centriolin                                                                 | 2.21E-06 |
| ENSG00000062822 | POLD1     | DNA polymerase delta 1, catalytic subunit                                  | 2.23E-06 |
| ENSG00000128408 | RIBC2     | RIB43A domain with coiled-coils 2                                          | 2.31E-06 |
| ENSG00000099901 | RANBP1    | RAN binding protein 1                                                      | 2.73E-06 |
| ENSG00000178878 | APOLD1    | Apolipoprotein L domain containing 1                                       | 2.74E-06 |

|                 |                 |                                                                      |          |
|-----------------|-----------------|----------------------------------------------------------------------|----------|
| ENSG00000132646 | PCNA            | Proliferating cell nuclear antigen                                   | 2.77E-06 |
| ENSG00000092621 | PHGDH           | Phosphoglycerate dehydrogenase                                       | 3.10E-06 |
| ENSG00000185432 | METTL7A         | Methyltransferase like 7A                                            | 3.12E-06 |
| ENSG00000165197 | VEGFD           | Vascular endothelial growth factor D                                 | 3.25E-06 |
| ENSG00000111581 | NUP107          | Nucleoporin 107                                                      | 3.39E-06 |
| ENSG00000125319 | HROB            | Homologous recombination factor with OB-fold                         | 3.73E-06 |
| ENSG00000158373 | H2BC5           | H2B clustered histone 5                                              | 4.25E-06 |
| ENSG00000010292 | NCAPD2          | Non-SMC condensin I complex subunit D2                               | 4.63E-06 |
| ENSG00000091651 | ORC6            | Origin recognition complex subunit 6                                 | 5.20E-06 |
| ENSG00000284906 | ARHGAP11B       | Rho gtpase activating protein 11B                                    | 5.29E-06 |
| ENSG00000198176 | TFDP1           | Transcription factor Dp-1                                            | 5.47E-06 |
| ENSG00000079819 | EPB41L2         | Erythrocyte membrane protein band 4.1 like 2                         | 5.69E-06 |
| ENSG00000175455 | CCDC14          | Coiled-coil domain containing 14                                     | 5.93E-06 |
| ENSG00000278023 | RDM1            | RAD52 motif containing 1                                             | 6.48E-06 |
| ENSG00000159147 | DONSON          | Downstream neighbor of SON                                           | 6.92E-06 |
| ENSG00000094916 | CBX5            | Chromobox 5                                                          | 8.04E-06 |
| ENSG00000106399 | RPA3            | Replication protein A3                                               | 8.37E-06 |
| ENSG00000095002 | MSH2            | Muts homolog 2                                                       | 8.91E-06 |
| ENSG00000152270 | PDE3B           | Phosphodiesterase 3B                                                 | 9.13E-06 |
| ENSG00000132967 | HMGB1P5         | High mobility group box 1 pseudogene 5                               | 1.00E-05 |
| ENSG00000152240 | HAUS1           | HAUS augmin like complex subunit 1                                   | 1.01E-05 |
| ENSG00000132749 | TESMIN          | Testis expressed metallothionein like protein                        | 1.03E-05 |
| ENSG00000172687 | ZNF738          | Zinc finger protein 738                                              | 1.03E-05 |
| ENSG00000136824 | SMC2            | Structural maintenance of chromosomes 2                              | 1.16E-05 |
| ENSG00000104738 | MCM4            | Minichromosome maintenance complex component 4                       | 1.24E-05 |
| ENSG00000118655 | DCLRE1B         | DNA cross-link repair 1B                                             | 1.24E-05 |
| ENSG00000169918 | OTUD7A          | OTU deubiquitinase 7A                                                | 1.27E-05 |
| ENSG00000145375 | SPATA5          | Spermatogenesis associated 5                                         | 1.46E-05 |
| ENSG00000160447 | PKN3            | Protein kinase N3                                                    | 1.48E-05 |
| ENSG00000185710 | SMG1P4          | SMG1 pseudogene 4                                                    | 1.50E-05 |
| ENSG00000165891 | E2F7            | E2F transcription factor 7                                           | 1.50E-05 |
| ENSG00000168476 | REEP4           | Receptor accessory protein 4                                         | 1.65E-05 |
| ENSG00000187790 | FANCM           | FA complementation group M                                           | 1.74E-05 |
| ENSG00000142149 | HUNK            | Hormonally up-regulated Neu-associated kinase                        | 2.00E-05 |
| ENSG00000256663 | AC112777.1      | Ubiquitin-like with PHD and ring finger domains 1 (UHRF1) pseudogene | 2.06E-05 |
| ENSG00000160229 | ZNF66           | Zinc finger protein 66                                               | 2.09E-05 |
| ENSG00000155755 | TMEM237         | Transmembrane protein 237                                            | 2.11E-05 |
| ENSG00000163002 | NUP35           | Nucleoporin 35                                                       | 2.19E-05 |
| ENSG00000165501 | LRR1            | Leucine rich repeat protein 1                                        | 2.38E-05 |
| ENSG00000182504 | CEP97           | Centrosomal protein 97                                               | 2.50E-05 |
| ENSG00000103495 | MAZ             | MYC associated zinc finger protein                                   | 2.67E-05 |
| ENSG00000231205 | ZNF826P         | Zinc finger protein 826, pseudogene                                  | 2.91E-05 |
| ENSG00000258555 | SPECC1L-ADORA2A | SPECC1L-ADORA2A readthrough (NMD candidate)                          | 3.12E-05 |
| ENSG00000130270 | ATP8B3          | Atpase phospholipid transporting 8B3                                 | 3.16E-05 |
| ENSG00000177084 | POLE            | DNA polymerase epsilon, catalytic subunit                            | 3.36E-05 |
| ENSG00000267041 | ZNF850          | Zinc finger protein 850                                              | 3.45E-05 |
| ENSG00000070081 | NUCB2           | Nucleobindin 2                                                       | 3.52E-05 |
| ENSG00000184661 | CDCA2           | Cell division cycle associated 2                                     | 3.87E-05 |
| ENSG00000174799 | CEP135          | Centrosomal protein 135                                              | 3.95E-05 |

|                 |          |                                                           |          |
|-----------------|----------|-----------------------------------------------------------|----------|
| ENSG00000154146 | NRGN     | Neurogranin                                               | 4.17E-05 |
| ENSG00000184897 | H1-10    | H1.10 linker histone                                      | 4.58E-05 |
| ENSG00000164985 | PSIP1    | PC4 and SFRS1 interacting protein 1                       | 4.78E-05 |
| ENSG00000176619 | LMNB2    | Lamin B2                                                  | 4.84E-05 |
| ENSG00000175445 | LPL      | Lipoprotein lipase                                        | 4.91E-05 |
| ENSG00000133739 | LRRCC1   | Leucine rich repeat and coiled-coil centrosomal protein 1 | 5.27E-05 |
| ENSG00000136518 | ACTL6A   | Actin like 6A                                             | 5.44E-05 |
| ENSG00000099256 | PRTFDC1  | Phosphoribosyl transferase domain containing 1            | 6.89E-05 |
| ENSG00000173218 | VANGL1   | VANGL planar cell polarity protein 1                      | 7.03E-05 |
| ENSG00000176974 | SHMT1    | Serine hydroxymethyltransferase 1                         | 7.09E-05 |
| ENSG00000137337 | MDC1     | Mediator of DNA damage checkpoint 1                       | 7.45E-05 |
| ENSG00000124207 | CSE1L    | Chromosome segregation 1 like                             | 8.64E-05 |
| ENSG00000116830 | TTF2     | Transcription termination factor 2                        | 8.87E-05 |
| ENSG00000081320 | STK17B   | Serine/threonine kinase 17b                               | 9.07E-05 |
| ENSG00000101868 | POLA1    | DNA polymerase alpha 1, catalytic subunit                 | 9.38E-05 |
| ENSG00000158427 | TMSB15B  | Thymosin beta 15B                                         | 9.44E-05 |
| ENSG00000050438 | SLC4A8   | Solute carrier family 4 member 8                          | 0.000106 |
| ENSG00000256229 | ZNF486   | Zinc finger protein 486                                   | 0.000106 |
| ENSG00000123737 | EXOSC9   | Exosome component 9                                       | 0.00011  |
| ENSG00000106268 | NUDT1    | Nudix hydrolase 1                                         | 0.000112 |
| ENSG00000109861 | CTSC     | Cathepsin C                                               | 0.000117 |
| ENSG00000198189 | HSD17B11 | Hydroxysteroid 17-beta dehydrogenase 11                   | 0.000134 |
| ENSG00000183765 | CHEK2    | Checkpoint kinase 2                                       | 0.000149 |
| ENSG00000213551 | DNAJC9   | Dnaj heat shock protein family (Hsp40) member C9          | 0.000151 |
| ENSG00000070950 | RAD18    | RAD18 E3 ubiquitin protein ligase                         | 0.000153 |
| ENSG00000115875 | SRSF7    | Serine and arginine rich splicing factor 7                | 0.000161 |
| ENSG00000267500 | ZNF887P  | Zinc finger protein 887, pseudogene                       | 0.000166 |
| ENSG00000136108 | CKAP2    | Cytoskeleton associated protein 2                         | 0.000187 |
| ENSG00000095777 | MYO3A    | Myosin IIIA                                               | 0.00019  |
| ENSG00000144485 | HES6     | Hes family bhlh transcription factor 6                    | 0.000192 |
| ENSG00000274588 | DGKK     | Diacylglycerol kinase kappa                               | 0.000223 |
| ENSG00000100242 | SUN2     | Sad1 and UNC84 domain containing 2                        | 0.000239 |
| ENSG00000156509 | FBXO43   | F-box protein 43                                          | 0.00024  |
| ENSG00000128951 | DUT      | Deoxyuridine triphosphatase                               | 0.000243 |
| ENSG00000187837 | H1-2     | H1.2 linker histone, cluster member                       | 0.000256 |
| ENSG00000155561 | NUP205   | Nucleoporin 205                                           | 0.000274 |
| ENSG00000167617 | CDC42EP5 | CDC42 effector protein 5                                  | 0.000282 |
| ENSG00000149548 | CCDC15   | Coiled-coil domain containing 15                          | 0.000317 |
| ENSG00000214826 | DDX12P   | DEAD/H-box helicase 12, pseudogene                        | 0.000325 |
| ENSG00000067955 | CBFB     | Core-binding factor subunit beta                          | 0.000344 |
| ENSG00000162062 | TEDC2    | Tubulin epsilon and delta complex 2                       | 0.000358 |
| ENSG00000179841 | AKAP5    | A-kinase anchoring protein 5                              | 0.000405 |
| ENSG00000103540 | CCP110   | Centriolar coiled-coil protein 110                        | 0.000415 |
| ENSG00000259781 | HMGB1P6  | High mobility group box 1 pseudogene 6                    | 0.000423 |
| ENSG00000144645 | OSBPL10  | Oxysterol binding protein like 10                         | 0.000429 |
| ENSG00000136811 | ODF2     | Outer dense fiber of sperm tails 2                        | 0.000447 |
| ENSG00000081870 | HSPB11   | Heat shock protein family B (small) member 11             | 0.000492 |
| ENSG00000158201 | ABHD3    | Abhydrolase domain containing 3                           | 0.000587 |
| ENSG00000178295 | GEN1     | GEN1 Holliday junction 5' flap endonuclease               | 0.000634 |
| ENSG00000076248 | UNG      | Uracil DNA glycosylase                                    | 0.00069  |

|                 |            |                                                                    |          |
|-----------------|------------|--------------------------------------------------------------------|----------|
| ENSG00000106355 | LSM5       | LSM5 homolog, U6 small nuclear RNA and mrna degradation associated | 0.000694 |
| ENSG00000259845 | HERC2P10   | Hect domain and RLD 2 pseudogene 10                                | 0.000698 |
| ENSG00000275221 | H2AC15     | H2A clustered histone 15                                           | 0.000699 |
| ENSG00000242419 | PCDHGC4    | Protocadherin gamma subfamily C, 4                                 | 0.0007   |
| ENSG00000077514 | POLD3      | DNA polymerase delta 3, accessory subunit                          | 0.000702 |
| ENSG00000125148 | MT2A       | Metallothionein 2A                                                 | 0.000725 |
| ENSG00000101773 | RBBP8      | RB binding protein 8, endonuclease                                 | 0.000773 |
| ENSG00000126453 | BCL2L12    | BCL2 like 12                                                       | 0.000785 |
| ENSG00000248710 | AC079594.2 | TRIM59 and ift80 readthrough                                       | 0.000797 |
| ENSG00000197451 | HNRNPAB    | Heterogeneous nuclear ribonucleoprotein A/B                        | 0.000898 |
| ENSG00000080200 | CRYBG3     | Crystallin beta-gamma domain containing 3                          | 0.000912 |
| ENSG00000260342 | AC138811.2 | Novel protein                                                      | 0.000916 |
| ENSG00000104219 | ZDHHC2     | Zinc finger DHHC-type palmitoyltransferase 2                       | 0.000937 |
| ENSG00000272196 | H2AC19     | H2A clustered histone 19                                           | 0.000939 |
| ENSG00000100578 | KIAA0586   | Kiaa0586                                                           | 0.000966 |
| ENSG00000275126 | H4C13      | H4 clustered histone 13                                            | 0.000979 |
| ENSG00000183684 | ALYREF     | Aly/REF export factor                                              | 0.000984 |
| ENSG00000163006 | CCDC138    | Coiled-coil domain containing 138                                  | 0.000999 |
| ENSG00000029993 | HMGB3      | High mobility group box 3                                          | 0.001048 |
| ENSG00000263513 | FAM72C     | Family with sequence similarity 72 member C                        | 0.001078 |
| ENSG00000179750 | APOBEC3B   | Apolipoprotein B mrna editing enzyme catalytic subunit 3B          | 0.001273 |
| ENSG00000187833 | C2orf78    | Chromosome 2 open reading frame 78                                 | 0.001295 |
| ENSG00000162174 | ASRGL1     | Asparaginase and isoaspartyl peptidase 1                           | 0.001295 |
| ENSG00000012048 | BRCA1      | BRCA1 DNA repair associated                                        | 0.001392 |
| ENSG00000163950 | SLBP       | Stem-loop binding protein                                          | 0.001392 |
| ENSG00000116062 | MSH6       | Muts homolog 6                                                     | 0.001401 |
| ENSG00000177917 | ARL6IP6    | ADP ribosylation factor like gtpase 6 interacting protein 6        | 0.001414 |
| ENSG00000217555 | CKLF       | Chemokine like factor                                              | 0.001614 |
| ENSG00000184635 | ZNF93      | Zinc finger protein 93                                             | 0.00165  |
| ENSG00000214796 | AC098934.1 | Tubulin, alpha (TUBA) pseudogene                                   | 0.001755 |
| ENSG00000013573 | DDX11      | DEAD/H-box helicase 11                                             | 0.001846 |
| ENSG00000162636 | FAM102B    | Family with sequence similarity 102 member B                       | 0.001932 |
| ENSG00000108468 | CBX1       | Chromobox 1                                                        | 0.001949 |
| ENSG00000156398 | SFXN2      | Sideroflexin 2                                                     | 0.001949 |
| ENSG00000152455 | SUV39H2    | Suppressor of variegation 3-9 homolog 2                            | 0.002016 |
| ENSG00000164754 | RAD21      | RAD21 cohesin complex component                                    | 0.002147 |
| ENSG00000029153 | ARNTL2     | Aryl hydrocarbon receptor nuclear translocator like 2              | 0.002311 |
| ENSG00000143493 | INTS7      | Integrator complex subunit 7                                       | 0.002371 |
| ENSG00000147050 | KDM6A      | Lysine demethylase 6A                                              | 0.002564 |
| ENSG00000120647 | CCDC77     | Coiled-coil domain containing 77                                   | 0.002565 |
| ENSG00000178343 | SHISA3     | Shisa family member 3                                              | 0.002773 |
| ENSG00000162039 | MEIOB      | Meiosis specific with OB-fold                                      | 0.002914 |
| ENSG00000167088 | SNRPD1     | Small nuclear ribonucleoprotein D1 polypeptide                     | 0.002961 |
| ENSG00000122566 | HNRNPA2B1  | Heterogeneous nuclear ribonucleoprotein A2/B1                      | 0.003167 |
| ENSG00000134291 | TMEM106C   | Transmembrane protein 106C                                         | 0.003506 |
| ENSG00000187134 | AKR1C1     | Aldo-keto reductase family 1 member C1                             | 0.003687 |
| ENSG00000152253 | SPC25      | SPC25 component of NDC80 kinetochore complex                       | 0.003714 |
| ENSG00000196172 | ZNF681     | Zinc finger protein 681                                            | 0.003918 |
| ENSG00000149929 | HIRIP3     | HIRA interacting protein 3                                         | 0.004202 |

|                 |             |                                                            |          |
|-----------------|-------------|------------------------------------------------------------|----------|
| ENSG00000276256 | AC011043.1  | Uncharacterized LOC389831                                  | 0.004312 |
| ENSG00000178177 | LCORL       | Ligand dependent nuclear receptor corepressor like         | 0.004477 |
| ENSG00000154040 | CABYR       | Calcium binding tyrosine phosphorylation regulated         | 0.004515 |
| ENSG00000196081 | ZNF724      | Zinc finger protein 724                                    | 0.004551 |
| ENSG00000109255 | NMU         | Neuromedin U                                               | 0.004588 |
| ENSG00000004777 | ARHGAP33    | Rho gtpase activating protein 33                           | 0.004665 |
| ENSG00000120699 | EXOSC8      | Exosome component 8                                        | 0.004677 |
| ENSG00000160352 | ZNF714      | Zinc finger protein 714                                    | 0.004715 |
| ENSG00000175322 | ZNF519      | Zinc finger protein 519                                    | 0.004817 |
| ENSG00000100206 | DMC1        | DNA meiotic recombinase 1                                  | 0.00495  |
| ENSG00000100401 | RANGAP1     | Ran gtpase activating protein 1                            | 0.004974 |
| ENSG00000251188 | AC079140.3  | Novel zinc finger protein pseudogene                       | 0.005107 |
| ENSG00000214425 | LRRC37A4P   | Leucine rich repeat containing 37 member A4, pseudogene    | 0.005111 |
| ENSG00000188985 | DHFRP1      | Dihydrofolate reductase pseudogene 1                       | 0.005143 |
| ENSG00000000460 | C1orf112    | Chromosome 1 open reading frame 112                        | 0.005155 |
| ENSG00000089280 | FUS         | FUS RNA binding protein                                    | 0.00523  |
| ENSG00000112081 | SRSF3       | Serine and arginine rich splicing factor 3                 | 0.005289 |
| ENSG00000147231 | RADX        | RPA1 related single stranded DNA binding protein, X-linked | 0.005719 |
| ENSG00000128059 | PPAT        | Phosphoribosyl pyrophosphate amidotransferase              | 0.005774 |
| ENSG00000253250 | C8orf88     | Chromosome 8 open reading frame 88                         | 0.005837 |
| ENSG00000235748 | SEPTIN14P12 | Septin 14 pseudogene 12                                    | 0.005948 |
| ENSG00000104626 | ERI1        | Exoribonuclease 1                                          | 0.006691 |
| ENSG00000105750 | ZNF85       | Zinc finger protein 85                                     | 0.006724 |
| ENSG00000187514 | PTMA        | Prothymosin alpha                                          | 0.006724 |
| ENSG00000184992 | BRI3BP      | BRI3 binding protein                                       | 0.006796 |
| ENSG00000198157 | HMG5        | High mobility group nucleosome binding domain 5            | 0.006989 |
| ENSG00000147274 | RBMX        | RNA binding motif protein X-linked                         | 0.007154 |
| ENSG00000151287 | TEX30       | Testis expressed 30                                        | 0.007212 |
| ENSG00000162073 | PAQR4       | Progesterone and adiponectin receptor family member 4      | 0.007582 |
| ENSG00000119333 | WDR34       | WD repeat domain 34                                        | 0.007634 |
| ENSG00000213024 | NUP62       | Nucleoporin 62                                             | 0.007664 |
| ENSG00000149136 | SSRP1       | Structure specific recognition protein 1                   | 0.007799 |
| ENSG00000105717 | PBX4        | PBX homeobox 4                                             | 0.008232 |
| ENSG00000132780 | NASP        | Nuclear autoantigenic sperm protein                        | 0.008232 |
| ENSG00000250312 | ZNF718      | Zinc finger protein 718                                    | 0.008774 |
| ENSG00000198088 | NUP62CL     | Nucleoporin 62 C-terminal like                             | 0.009001 |
| ENSG00000271254 | AC240274.1  | Neuroblastoma breakpoint family member 1                   | 0.009001 |
| ENSG00000025770 | NCAPH2      | Non-SMC condensin II complex subunit H2                    | 0.009174 |
| ENSG00000151503 | NCAPD3      | Non-SMC condensin II complex subunit D3                    | 0.00932  |
| ENSG00000204209 | DAXX        | Death domain associated protein                            | 0.009468 |
| ENSG00000214944 | ARHGEF28    | Rho guanine nucleotide exchange factor 28                  | 0.009631 |
| ENSG00000175130 | MARCKSL1    | MARCKS like 1                                              | 0.009761 |
| ENSG00000171793 | CTPS1       | CTP synthase 1                                             | 0.009934 |
| ENSG00000079387 | SENP1       | SUMO specific peptidase 1                                  | 0.009978 |
| ENSG00000197121 | PGAP1       | Post-GPI attachment to proteins inositol deacylase 1       | 0.009987 |
| ENSG00000148835 | TAF5        | TATA-box binding protein associated factor 5               | 0.010421 |
| ENSG00000173848 | NET1        | Neuroepithelial cell transforming 1                        | 0.010811 |
| ENSG00000077684 | JADE1       | Jade family PHD finger 1                                   | 0.01111  |

|                 |              |                                                              |          |
|-----------------|--------------|--------------------------------------------------------------|----------|
| ENSG00000151388 | ADAMTS12     | ADAM metallopeptidase with thrombospondin type 1 motif 12    | 0.011792 |
| ENSG00000136861 | CDK5RAP2     | CDK5 regulatory subunit associated protein 2                 | 0.012035 |
| ENSG00000186298 | PPP1CC       | Protein phosphatase 1 catalytic subunit gamma                | 0.012084 |
| ENSG00000169684 | CHRNA5       | Cholinergic receptor nicotinic alpha 5 subunit               | 0.012309 |
| ENSG00000118298 | CA14         | Carbonic anhydrase 14                                        | 0.012535 |
| ENSG00000244306 | AL589743.1   | Double homeobox A pseudogene 10                              | 0.013477 |
| ENSG00000123416 | TUBA1B       | Tubulin alpha 1b                                             | 0.013583 |
| ENSG00000196230 | TUBB         | Tubulin beta class I                                         | 0.013583 |
| ENSG00000141576 | RNF157       | Ring finger protein 157                                      | 0.014763 |
| ENSG00000068028 | RASSF1       | Ras association domain family member 1                       | 0.014917 |
| ENSG00000198435 | NRARP        | NOTCH regulated ankyrin repeat protein                       | 0.01502  |
| ENSG00000139291 | TMEM19       | Transmembrane protein 19                                     | 0.015387 |
| ENSG00000139734 | DIAPH3       | Diaphanous related formin 3                                  | 0.015427 |
| ENSG00000269226 | TMSB15B      | Thymosin beta 15B                                            | 0.016019 |
| ENSG00000115355 | CCDC88A      | Coiled-coil domain containing 88A                            | 0.016645 |
| ENSG00000162929 | KIAA1841     | Kiaa1841                                                     | 0.01682  |
| ENSG00000107566 | ERLIN1       | ER lipid raft associated 1                                   | 0.017038 |
| ENSG00000141401 | IMPA2        | Inositol monophosphatase 2                                   | 0.017097 |
| ENSG00000198521 | ZNF43        | Zinc finger protein 43                                       | 0.017097 |
| ENSG00000174600 | CMKLR1       | Chemerin chemokine-like receptor 1                           | 0.017237 |
| ENSG00000182628 | SKA2         | Spindle and kinetochore associated complex subunit 2         | 0.017932 |
| ENSG00000174010 | KLHL15       | Kelch like family member 15                                  | 0.018042 |
| ENSG00000125450 | NUP85        | Nucleoporin 85                                               | 0.01827  |
| ENSG00000277112 | ANKRD20A21 P | Ankyrin repeat domain 20 family member A21, pseudogene       | 0.018527 |
| ENSG00000176894 | PXMP2        | Peroxisomal membrane protein 2                               | 0.018527 |
| ENSG00000099783 | HNRNPM       | Heterogeneous nuclear ribonucleoprotein M                    | 0.01863  |
| ENSG00000133985 | TTC9         | Tetratricopeptide repeat domain 9                            | 0.01902  |
| ENSG00000132016 | C19orf57     | Chromosome 19 open reading frame 57                          | 0.019595 |
| ENSG00000143643 | TTC13        | Tetratricopeptide repeat domain 13                           | 0.019841 |
| ENSG00000011332 | DPF1         | Double PHD fingers 1                                         | 0.019976 |
| ENSG00000101911 | PRPS2        | Phosphoribosyl pyrophosphate synthetase 2                    | 0.02015  |
| ENSG00000197020 | ZNF100       | Zinc finger protein 100                                      | 0.020626 |
| ENSG00000138587 | MNS1         | Meiosis specific nuclear structural 1                        | 0.020638 |
| ENSG00000151466 | SCLT1        | Sodium channel and clathrin linker 1                         | 0.021023 |
| ENSG00000104059 | FAM189A1     | Family with sequence similarity 189 member A1                | 0.02128  |
| ENSG00000102230 | PCYT1B       | Phosphate cytidylyltransferase 1, choline, beta              | 0.021392 |
| ENSG00000114405 | C3orf14      | Chromosome 3 open reading frame 14                           | 0.021959 |
| ENSG00000147874 | HAUS6        | HAUS augmin like complex subunit 6                           | 0.022358 |
| ENSG00000183624 | HMCES        | 5-hydroxymethylcytosine binding, ES cell specific            | 0.022527 |
| ENSG00000179241 | LDLRAD3      | Low density lipoprotein receptor class A domain containing 3 | 0.022638 |
| ENSG00000128708 | HAT1         | Histone acetyltransferase 1                                  | 0.022648 |
| ENSG00000105968 | H2AZ2        | H2A.Z variant histone 2                                      | 0.022686 |
| ENSG00000183207 | RUVBL2       | Ruvb like AAA atpase 2                                       | 0.022768 |
| ENSG00000104267 | CA2          | Carbonic anhydrase 2                                         | 0.023145 |
| ENSG0000020922  | MRE11        | MRE11 homolog, double strand break repair nuclease           | 0.023578 |
| ENSG00000189362 | NEMP2        | Nuclear envelope integral membrane protein 2                 | 0.024134 |
| ENSG00000170264 | FAM161A      | FAM161 centrosomal protein A                                 | 0.024257 |
| ENSG00000106571 | GLI3         | GLI family zinc finger 3                                     | 0.024473 |

|                 |            |                                                               |          |
|-----------------|------------|---------------------------------------------------------------|----------|
| ENSG00000136159 | NUDT15     | Nudix hydrolase 15                                            | 0.024473 |
| ENSG00000114541 | FRMD4B     | FERM domain containing 4B                                     | 0.027076 |
| ENSG00000197771 | MCMBP      | Minichromosome maintenance complex binding protein            | 0.027145 |
| ENSG00000213390 | ARHGAP19   | Rho gtpase activating protein 19                              | 0.027612 |
| ENSG00000198039 | ZNF273     | Zinc finger protein 273                                       | 0.028146 |
| ENSG00000249115 | HAUS5      | HAUS augmin like complex subunit 5                            | 0.029503 |
| ENSG00000107672 | NSMCE4A    | NSE4 homolog A, SMC5-SMC6 complex component                   | 0.032497 |
| ENSG00000136938 | ANP32B     | Acidic nuclear phosphoprotein 32 family member B              | 0.033534 |
| ENSG00000183148 | ANKRD20A2  | Ankyrin repeat domain 20 family member A2                     | 0.033804 |
| ENSG00000186522 | SEPTIN10   | Septin 10                                                     | 0.033966 |
| ENSG00000286132 | AC022415.3 | Novel protein                                                 | 0.033993 |
| ENSG00000169508 | GPR183     | G protein-coupled receptor 183                                | 0.034006 |
| ENSG00000241634 | AC069499.2 | Ribosomal protein L13 (RPL13) pseudogene                      | 0.035083 |
| ENSG00000198168 | SVIP       | Small VCP interacting protein                                 | 0.035464 |
| ENSG00000107105 | ELAVL2     | ELAV like RNA binding protein 2                               | 0.035771 |
| ENSG00000130816 | DNMT1      | DNA methyltransferase 1                                       | 0.036655 |
| ENSG00000134758 | RNF138     | Ring finger protein 138                                       | 0.037618 |
| ENSG00000146426 | TIAM2      | TIAM Rac1 associated GEF 2                                    | 0.038632 |
| ENSG00000121988 | ZRANB3     | Zinc finger RANBP2-type containing 3                          | 0.040433 |
| ENSG00000280571 | AC006059.2 | Novel protein                                                 | 0.040631 |
| ENSG00000161547 | SRSF2      | Serine and arginine rich splicing factor 2                    | 0.041157 |
| ENSG00000126878 | AIF1L      | Allograft inflammatory factor 1 like                          | 0.04171  |
| ENSG00000056050 | HPF1       | Histone parylation factor 1                                   | 0.041956 |
| ENSG00000104889 | RNASEH2A   | Ribonuclease H2 subunit A                                     | 0.043069 |
| ENSG00000184270 | H2AC21     | H2A clustered histone 21                                      | 0.043394 |
| ENSG00000203814 | H2BC18     | H2B clustered histone 18                                      | 0.043794 |
| ENSG00000181588 | MEX3D      | Mex-3 RNA binding family member D                             | 0.04415  |
| ENSG00000171960 | PPIH       | Peptidylprolyl isomerase H                                    | 0.044159 |
| ENSG00000198155 | ZNF876P    | Zinc finger protein 876, pseudogene                           | 0.044573 |
| ENSG00000170037 | CNTROB     | Centrobin, centriole duplication and spindle assembly protein | 0.044584 |
| ENSG00000260802 | SERTM2     | Serine rich and transmembrane domain containing 2             | 0.04481  |
| ENSG00000183798 | EMILIN3    | Elastin microfibril interfacer 3                              | 0.044836 |
| ENSG00000104177 | MYEF2      | Myelin expression factor 2                                    | 0.045202 |
| ENSG00000180998 | GPR137C    | G protein-coupled receptor 137C                               | 0.045294 |
| ENSG00000096654 | ZNF184     | Zinc finger protein 184                                       | 0.045418 |
| ENSG00000118412 | CASP8AP2   | Caspase 8 associated protein 2                                | 0.046588 |
| ENSG00000149639 | SOGA1      | Suppressor of glucose, autophagy associated 1                 | 0.047252 |
| ENSG00000118513 | MYB        | MYB proto-oncogene, transcription factor                      | 0.048162 |
| ENSG00000204410 | MSH5       | Muts homolog 5                                                | 0.048907 |
| ENSG00000160201 | U2AF1      | U2 small nuclear RNA auxiliary factor 1                       | 0.049099 |
| ENSG00000144677 | CTDSPL     | CTD small phosphatase like                                    | 0.049262 |
| ENSG00000087301 | TXNDC16    | Thioredoxin domain containing 16                              | 0.049712 |

**Supplementary Table S2.** Statistically significant DEGs (Adj.*p*-value<0.05) derived from DGEA of RNA-Seq data from Primary Human Lung Fibroblasts (IMR90) after X-ray irradiation, using DESeq2. The experiment consists of 3 control samples and 3 irradiated with 2 Gy X-ray radiation for 24 hours [Bioproject: PRJNA436999].

| Ensembl ID                  | Gene Symbol | Gene Description                                                          | Adj. <i>p</i> -Value |
|-----------------------------|-------------|---------------------------------------------------------------------------|----------------------|
| <b>Up-Regulated Genes ↑</b> |             |                                                                           |                      |
| ENSG00000124762             | CDKN1A      | Cyclin dependent kinase inhibitor 1A                                      | 1.17E-83             |
| ENSG00000163071             | SPATA18     | Spermatogenesis associated 18                                             | 3.10E-38             |
| ENSG00000173530             | TNFRSF10D   | TNF receptor superfamily member 10d                                       | 5.93E-29             |
| ENSG00000181026             | AEN         | Apoptosis enhancing nuclease                                              | 7.02E-28             |
| ENSG00000055163             | CYFIP2      | Cytoplasmic FMR1 interacting protein 2                                    | 1.83E-27             |
| ENSG00000161513             | FDXR        | Ferredoxin reductase                                                      | 7.58E-27             |
| ENSG00000130513             | GDF15       | Growth differentiation factor 15                                          | 3.66E-25             |
| ENSG00000087088             | BAX         | BCL2 associated X, apoptosis regulator                                    | 7.75E-25             |
| ENSG00000105327             | BBC3        | BCL2 binding component 3                                                  | 8.07E-22             |
| ENSG00000131080             | EDA2R       | Ectodysplasin A2 receptor                                                 | 4.88E-21             |
| ENSG00000110900             | TSPAN11     | Tetraspanin 11                                                            | 2.57E-20             |
| ENSG00000120889             | TNFRSF10B   | TNF receptor superfamily member 10b                                       | 2.82E-20             |
| ENSG00000134574             | DDB2        | Damage specific DNA binding protein 2                                     | 5.11E-19             |
| ENSG00000132274             | TRIM22      | Tripartite motif containing 22                                            | 4.48E-17             |
| ENSG00000080546             | SESN1       | Sestrin 1                                                                 | 1.39E-14             |
| ENSG00000180155             | LYNX1       | Ly6/neurotoxin 1                                                          | 3.06E-14             |
| ENSG00000167196             | FBXO22      | F-box protein 22                                                          | 9.81E-14             |
| ENSG00000154767             | XPC         | XPC complex subunit, DNA damage recognition and repair factor             | 1.90E-13             |
| ENSG00000174307             | PHLDA3      | Pleckstrin homology like domain family A member 3                         | 6.02E-13             |
| ENSG00000112249             | ASCC3       | Activating signal cointegrator 1 complex subunit 3                        | 3.45E-12             |
| ENSG00000196562             | SULF2       | Sulfatase 2                                                               | 5.29E-12             |
| ENSG00000172667             | ZMAT3       | Zinc finger matrin-type 3                                                 | 3.93E-11             |
| ENSG00000173535             | TNFRSF10C   | TNF receptor superfamily member 10c                                       | 7.97E-11             |
| ENSG00000142627             | EPHA2       | EPH receptor A2                                                           | 8.93E-11             |
| ENSG00000026103             | FAS         | Fas cell surface death receptor                                           | 5.97E-10             |
| ENSG00000228430             | AL162726.3  | Serine palmitoyltransferase long chain base subunit 1 (SPTLC1) pseudogene | 5.24E-09             |
| ENSG00000148175             | STOM        | Stomatin                                                                  | 9.52E-09             |
| ENSG00000135919             | SERPINE2    | Serpin family E member 2                                                  | 1.07E-08             |
| ENSG00000170855             | TRIAP1      | TP53 regulated inhibitor of apoptosis 1                                   | 1.51E-08             |
| ENSG00000177106             | EPS8L2      | EPS8 like 2                                                               | 1.97E-08             |
| ENSG00000128422             | KRT17       | Keratin 17                                                                | 2.02E-08             |
| ENSG00000130766             | SESN2       | Sestrin 2                                                                 | 4.04E-08             |
| ENSG00000054148             | PHPT1       | Phosphohistidine phosphatase 1                                            | 7.49E-08             |
| ENSG00000177943             | MAMDC4      | MAM domain containing 4                                                   | 1.02E-07             |
| ENSG00000051108             | HERPUD1     | Homocysteine inducible ER protein with ubiquitin like domain 1            | 1.14E-07             |
| ENSG00000171246             | NPTX1       | Neuronal pentraxin 1                                                      | 1.98E-07             |
| ENSG00000112715             | VEGFA       | Vascular endothelial growth factor A                                      | 3.01E-07             |
| ENSG00000159388             | BTG2        | BTG anti-proliferation factor 2                                           | 3.74E-07             |
| ENSG00000141232             | TOB1        | Transducer of ERBB2, 1                                                    | 4.46E-07             |
| ENSG00000176697             | BDNF        | Brain derived neurotrophic factor                                         | 1.77E-06             |
| ENSG00000173846             | PLK3        | Polo like kinase 3                                                        | 1.96E-06             |



|                 |            |                                                                |          |
|-----------------|------------|----------------------------------------------------------------|----------|
| ENSG00000182247 | UBE2E2     | Ubiquitin conjugating enzyme E2 E2                             | 2.10E-06 |
| ENSG00000048392 | RRM2B      | Ribonucleotide reductase regulatory TP53 inducible subunit M2B | 4.60E-06 |
| ENSG00000011114 | BTBD7      | BTB domain containing 7                                        | 5.28E-06 |
| ENSG00000168621 | GDNF       | Glial cell derived neurotrophic factor                         | 5.35E-06 |
| ENSG00000197093 | GAL3ST4    | Galactose-3-O-sulfotransferase 4                               | 6.71E-06 |
| ENSG00000165072 | MAMDC2     | MAM domain containing 2                                        | 6.71E-06 |
| ENSG00000163735 | CXCL5      | C-X-C motif chemokine ligand 5                                 | 6.71E-06 |
| ENSG00000196975 | ANXA4      | Annexin A4                                                     | 8.08E-06 |
| ENSG00000178607 | ERN1       | Endoplasmic reticulum to nucleus signaling 1                   | 1.09E-05 |
| ENSG00000162643 | WDR63      | WD repeat domain 63                                            | 1.70E-05 |
| ENSG00000113328 | CCNG1      | Cyclin G1                                                      | 1.76E-05 |
| ENSG00000138166 | DUSP5      | Dual specificity phosphatase 5                                 | 2.22E-05 |
| ENSG00000185088 | RPS27L     | Ribosomal protein S27 like                                     | 2.45E-05 |
| ENSG00000182752 | PAPPA      | Pappalysin 1                                                   | 2.64E-05 |
| ENSG00000113108 | APBB3      | Amyloid beta precursor protein binding family B member 3       | 3.20E-05 |
| ENSG00000059804 | SLC2A3     | Solute carrier family 2 member 3                               | 3.41E-05 |
| ENSG00000244509 | APOBEC3C   | Apolipoprotein B mRNA editing enzyme catalytic subunit 3C      | 5.14E-05 |
| ENSG00000124466 | LYPD3      | LY6/PLAUR domain containing 3                                  | 6.25E-05 |
| ENSG00000104689 | TNFRSF10A  | TNF receptor superfamily member 10a                            | 6.46E-05 |
| ENSG00000277639 | AC007906.2 | Novel protein                                                  | 7.16E-05 |
| ENSG00000116574 | RHOU       | Ras homolog family member U                                    | 7.34E-05 |
| ENSG00000169429 | CXCL8      | C-X-C motif chemokine ligand 8                                 | 7.42E-05 |
| ENSG00000116183 | PAPPA2     | Pappalysin 2                                                   | 7.89E-05 |
| ENSG00000160691 | SHC1       | SHC adaptor protein 1                                          | 8.01E-05 |
| ENSG00000182580 | EPHB3      | EPH receptor B3                                                | 9.16E-05 |
| ENSG00000197872 | FAM49A     | Family with sequence similarity 49 member A                    | 0.000157 |
| ENSG00000244694 | PTCHD4     | Patched domain containing 4                                    | 0.000157 |
| ENSG00000168918 | INPP5D     | Inositol polyphosphate-5-phosphatase D                         | 0.000158 |
| ENSG00000065491 | TBC1D22B   | TBC1 domain family member 22B                                  | 0.000162 |
| ENSG00000103257 | SLC7A5     | Solute carrier family 7 member 5                               | 0.000169 |
| ENSG00000101928 | MOSPD1     | Motile sperm domain containing 1                               | 0.000182 |
| ENSG00000136244 | IL6        | Interleukin 6                                                  | 0.000211 |
| ENSG00000196152 | ZNF79      | Zinc finger protein 79                                         | 0.000221 |
| ENSG00000105372 | RPS19      | Ribosomal protein S19                                          | 0.000222 |
| ENSG00000197632 | SERPINB2   | Serpin family B member 2                                       | 0.000301 |
| ENSG00000163734 | CXCL3      | C-X-C motif chemokine ligand 3                                 | 0.000325 |
| ENSG00000105649 | RAB3A      | RAB3A, member RAS oncogene family                              | 0.000326 |
| ENSG00000225511 | LINC00475  | Long intergenic non-protein coding RNA 475                     | 0.000345 |
| ENSG00000125538 | IL1B       | Interleukin 1 beta                                             | 0.000353 |
| ENSG00000163739 | CXCL1      | C-X-C motif chemokine ligand 1                                 | 0.000369 |
| ENSG00000124098 | FAM210B    | Family with sequence similarity 210 member B                   | 0.000386 |
| ENSG00000198064 | NPIP13     | Nuclear pore complex interacting protein family, member B13    | 0.000395 |
| ENSG00000081041 | CXCL2      | C-X-C motif chemokine ligand 2                                 | 0.000443 |
| ENSG00000164938 | TP53INP1   | Tumor protein p53 inducible nuclear protein 1                  | 0.000451 |
| ENSG00000116761 | CTH        | Cystathionine gamma-lyase                                      | 0.000466 |
| ENSG00000140379 | BCL2A1     | BCL2 related protein A1                                        | 0.000486 |
| ENSG00000168209 | DDIT4      | DNA damage inducible transcript 4                              | 0.000509 |

|                 |            |                                                                            |          |
|-----------------|------------|----------------------------------------------------------------------------|----------|
| ENSG00000158050 | DUSP2      | Dual specificity phosphatase 2                                             | 0.000558 |
| ENSG00000132256 | TRIM5      | Tripartite motif containing 5                                              | 0.000573 |
| ENSG00000135679 | MDM2       | MDM2 proto-oncogene                                                        | 0.000593 |
| ENSG00000112773 | TENT5A     | Terminal nucleotidyltransferase 5A                                         | 0.000594 |
| ENSG00000144476 | ACKR3      | Atypical chemokine receptor 3                                              | 0.000595 |
| ENSG00000115008 | IL1A       | Interleukin 1 alpha                                                        | 0.000596 |
| ENSG00000255112 | CHMP1B     | Charged multivesicular body protein 1B                                     | 0.000621 |
| ENSG00000172890 | NADSYN1    | NAD synthetase 1                                                           | 0.000626 |
| ENSG00000116741 | RGS2       | Regulator of G protein signaling 2                                         | 0.000658 |
| ENSG00000123358 | NR4A1      | Nuclear receptor subfamily 4 group A member 1                              | 0.000684 |
| ENSG00000272921 | AC005832.4 | Novel protein                                                              | 0.000887 |
| ENSG00000104613 | INTS10     | Integrator complex subunit 10                                              | 0.00091  |
| ENSG00000068912 | ERLEC1     | Endoplasmic reticulum lectin 1                                             | 0.000989 |
| ENSG00000013588 | GPRC5A     | G protein-coupled receptor class C group 5 member A                        | 0.001023 |
| ENSG00000185112 | FAM43A     | Family with sequence similarity 43 member A                                | 0.001062 |
| ENSG00000163659 | TIPARP     | TCDD inducible poly(ADP-ribose) polymerase                                 | 0.001064 |
| ENSG00000138685 | FGF2       | Fibroblast growth factor 2                                                 | 0.001151 |
| ENSG00000111817 | DSE        | Dermatan sulfate epimerase                                                 | 0.001176 |
| ENSG00000168497 | CAVIN2     | Caveolae associated protein 2                                              | 0.00125  |
| ENSG00000108342 | CSF3       | Colony stimulating factor 3                                                | 0.00125  |
| ENSG00000112697 | TMEM30A    | Transmembrane protein 30A                                                  | 0.001326 |
| ENSG00000184205 | TSPYL2     | TSPY like 2                                                                | 0.001374 |
| ENSG00000065357 | DGKA       | Diacylglycerol kinase alpha                                                | 0.001546 |
| ENSG00000136826 | KLF4       | Kruppel like factor 4                                                      | 0.001598 |
| ENSG00000196576 | PLXNB2     | Plexin B2                                                                  | 0.001926 |
| ENSG00000171033 | PKIA       | Camp-dependent protein kinase inhibitor alpha                              | 0.002065 |
| ENSG00000137819 | PAQR5      | Progesterin and adipog receptor family member 5                            | 0.002151 |
| ENSG00000095794 | CREM       | Camp responsive element modulator                                          | 0.002188 |
| ENSG00000179094 | PER1       | Period circadian regulator 1                                               | 0.002197 |
| ENSG00000146592 | CREB5      | Camp responsive element binding protein 5                                  | 0.00231  |
| ENSG00000088826 | SMOX       | Spermine oxidase                                                           | 0.002351 |
| ENSG00000087589 | CASS4      | Cas scaffold protein family member 4                                       | 0.002384 |
| ENSG00000106004 | HOXA5      | Homeobox A5                                                                | 0.00253  |
| ENSG00000128590 | DNAJB9     | Dnaj heat shock protein family (Hsp40) member B9                           | 0.002562 |
| ENSG00000184588 | PDE4B      | Phosphodiesterase 4B                                                       | 0.002629 |
| ENSG00000001626 | CFTR       | CF transmembrane conductance regulator                                     | 0.002785 |
| ENSG00000176907 | TCIM       | Transcriptional and immune response regulator                              | 0.002798 |
| ENSG00000070540 | WIPI1      | WD repeat domain, phosphoinositide interacting 1                           | 0.002885 |
| ENSG00000154319 | FAM167A    | Family with sequence similarity 167 member A                               | 0.003048 |
| ENSG00000073756 | PTGS2      | Prostaglandin-endoperoxide synthase 2                                      | 0.003157 |
| ENSG00000285976 | AL135905.2 | Novel protein                                                              | 0.003404 |
| ENSG00000256206 | AC018523.2 | Novel protein                                                              | 0.003457 |
| ENSG00000130066 | SAT1       | Spermidine/spermine N1-acetyltransferase 1                                 | 0.003582 |
| ENSG00000104970 | KIR3DX1    | Killer cell immunoglobulin like receptor, three Ig domains X1 (pseudogene) | 0.003582 |
| ENSG00000121039 | RDH10      | Retinol dehydrogenase 10                                                   | 0.003664 |
| ENSG00000171219 | CDC42BPG   | CDC42 binding protein kinase gamma                                         | 0.003842 |
| ENSG00000134107 | BHLHE40    | Basic helix-loop-helix family member e40                                   | 0.00399  |
| ENSG00000100739 | BDKRB1     | Bradykinin receptor B1                                                     | 0.003994 |
| ENSG00000143507 | DUSP10     | Dual specificity phosphatase 10                                            | 0.003994 |
| ENSG00000145040 | UCN2       | Urocortin 2                                                                | 0.004269 |

|                 |            |                                                                      |          |
|-----------------|------------|----------------------------------------------------------------------|----------|
| ENSG00000167992 | VWCE       | Von Willebrand factor C and EGF domains                              | 0.004289 |
| ENSG00000100906 | NFKBIA     | NFKB inhibitor alpha                                                 | 0.004488 |
| ENSG00000169594 | BNC1       | Basonuclin 1                                                         | 0.0052   |
| ENSG00000102804 | TSC22D1    | TSC22 domain family member 1                                         | 0.00534  |
| ENSG00000124216 | SNAI1      | Snail family transcriptional repressor 1                             | 0.005595 |
| ENSG00000122484 | RPAP2      | RNA polymerase II associated protein 2                               | 0.005767 |
| ENSG00000164237 | CMBL       | Carboxymethylenebutenolidase homolog                                 | 0.005945 |
| ENSG00000128342 | LIF        | LIF interleukin 6 family cytokine                                    | 0.00626  |
| ENSG00000115421 | PAPOLG     | Poly(A) polymerase gamma                                             | 0.007146 |
| ENSG00000175600 | SUGCT      | Succinyl-coa:glutarate-coa transferase                               | 0.00734  |
| ENSG00000188243 | COMM6      | COMM domain containing 6                                             | 0.007405 |
| ENSG00000104321 | TRPA1      | Transient receptor potential cation channel subfamily A member 1     | 0.007434 |
| ENSG00000091592 | NLRP1      | NLR family pyrin domain containing 1                                 | 0.007483 |
| ENSG00000101255 | TRIB3      | Tribbles pseudokinase 3                                              | 0.007787 |
| ENSG00000003989 | SLC7A2     | Solute carrier family 7 member 2                                     | 0.008206 |
| ENSG00000142178 | SIK1       | Salt inducible kinase 1                                              | 0.008358 |
| ENSG00000170836 | PPM1D      | Protein phosphatase, Mg <sup>2+</sup> /Mn <sup>2+</sup> dependent 1D | 0.008422 |
| ENSG00000176531 | PHLDB3     | Pleckstrin homology like domain family B member 3                    | 0.008947 |
| ENSG00000075413 | MARK3      | Microtubule affinity regulating kinase 3                             | 0.009249 |
| ENSG00000137975 | CLCA2      | Chloride channel accessory 2                                         | 0.009424 |
| ENSG00000042445 | RETSAT     | Retinol saturase                                                     | 0.009564 |
| ENSG00000130844 | ZNF331     | Zinc finger protein 331                                              | 0.00959  |
| ENSG00000088340 | FER1L4     | Fer-1 like family member 4 (pseudogene)                              | 0.010024 |
| ENSG00000165272 | AQP3       | Aquaporin 3 (Gill blood group)                                       | 0.010913 |
| ENSG00000163638 | ADAMTS9    | ADAM metallopeptidase with thrombospondin type 1 motif 9             | 0.010973 |
| ENSG00000124882 | EREG       | Epiregulin                                                           | 0.011037 |
| ENSG00000078237 | TIGAR      | TP53 induced glycolysis regulatory phosphatase                       | 0.011078 |
| ENSG00000114270 | COL7A1     | Collagen type VII alpha 1 chain                                      | 0.011081 |
| ENSG00000124875 | CXCL6      | C-X-C motif chemokine ligand 6                                       | 0.011613 |
| ENSG00000204920 | ZNF155     | Zinc finger protein 155                                              | 0.011786 |
| ENSG00000134363 | FST        | Follistatin                                                          | 0.011789 |
| ENSG00000103253 | HAGHL      | Hydroxyacylglutathione hydrolase like                                | 0.011802 |
| ENSG00000145632 | PLK2       | Polo like kinase 2                                                   | 0.011821 |
| ENSG00000148344 | PTGES      | Prostaglandin E synthase                                             | 0.011821 |
| ENSG00000144655 | CSRNP1     | Cysteine and serine rich nuclear protein 1                           | 0.011836 |
| ENSG00000162496 | DHRS3      | Dehydrogenase/reductase 3                                            | 0.01195  |
| ENSG00000171223 | JUNB       | Junb proto-oncogene, AP-1 transcription factor subunit               | 0.012326 |
| ENSG00000255730 | AC011462.1 | Novel protein                                                        | 0.012385 |
| ENSG00000153234 | NR4A2      | Nuclear receptor subfamily 4 group A member 2                        | 0.012396 |
| ENSG00000104635 | SLC39A14   | Solute carrier family 39 member 14                                   | 0.012936 |
| ENSG00000152049 | KCNE4      | Potassium voltage-gated channel subfamily E regulatory subunit 4     | 0.013231 |
| ENSG00000188234 | AGAP4      | Arfgap with gtpase domain, ankyrin repeat and PH domain 4            | 0.013316 |
| ENSG00000115009 | CCL20      | C-C motif chemokine ligand 20                                        | 0.013408 |
| ENSG00000132510 | KDM6B      | Lysine demethylase 6B                                                | 0.0135   |
| ENSG00000151065 | DCP1B      | Decapping mma 1B                                                     | 0.013627 |
| ENSG00000177595 | PIDD1      | P53-induced death domain protein 1                                   | 0.013665 |
| ENSG00000165312 | OTUD1      | OTU deubiquitinase 1                                                 | 0.014166 |

|                 |            |                                                            |          |
|-----------------|------------|------------------------------------------------------------|----------|
| ENSG00000186866 | POFUT2     | Protein O-fucosyltransferase 2                             | 0.014758 |
| ENSG00000099875 | MKNK2      | MAPK interacting serine/threonine kinase 2                 | 0.014866 |
| ENSG00000164331 | ANKRA2     | Ankyrin repeat family A member 2                           | 0.015052 |
| ENSG00000124067 | SLC12A4    | Solute carrier family 12 member 4                          | 0.015183 |
| ENSG00000156976 | EIF4A2     | Eukaryotic translation initiation factor 4A2               | 0.015304 |
| ENSG00000125772 | GPCPD1     | Glycerophosphocholine phosphodiesterase 1                  | 0.015445 |
| ENSG00000198001 | AC093012.1 | Interleukin 1 receptor associated kinase 4                 | 0.015605 |
| ENSG00000013441 | CLK1       | CDC like kinase 1                                          | 0.015605 |
| ENSG00000143333 | RGS16      | Regulator of G protein signaling 16                        | 0.015635 |
| ENSG00000224877 | NDUFAF8    | NADH:ubiquinone oxidoreductase complex assembly factor 8   | 0.015678 |
| ENSG00000204219 | TCEA3      | Transcription elongation factor A3                         | 0.015678 |
| ENSG00000173230 | GOLGB1     | Golgin B1                                                  | 0.01621  |
| ENSG00000123610 | TNFAIP6    | TNF alpha induced protein 6                                | 0.016961 |
| ENSG00000121361 | KCNJ8      | Potassium inwardly rectifying channel subfamily J member 8 | 0.017063 |
| ENSG00000056972 | TRAF3IP2   | TRAF3 interacting protein 2                                | 0.01728  |
| ENSG00000103742 | IGDCC4     | Immunoglobulin superfamily DCC subclass member 4           | 0.017285 |
| ENSG00000110944 | IL23A      | Interleukin 23 subunit alpha                               | 0.018741 |
| ENSG00000186340 | THBS2      | Thrombospondin 2                                           | 0.019515 |
| ENSG00000139112 | GABARAPL1  | GABA type A receptor associated protein like 1             | 0.019696 |
| ENSG00000139636 | LMBR1L     | Limb development membrane protein 1 like                   | 0.020848 |
| ENSG00000259529 | AL136295.5 | Novel transcript                                           | 0.02178  |
| ENSG00000128052 | KDR        | Kinase insert domain receptor                              | 0.022347 |
| ENSG00000002745 | WNT16      | Wnt family member 16                                       | 0.022521 |
| ENSG00000279483 | AC090498.1 | Ribosomal protein L41 (RPL41) pseudogene                   | 0.022677 |
| ENSG00000164125 | GASK1B     | Golgi associated kinase 1B                                 | 0.022743 |
| ENSG00000140285 | FGF7       | Fibroblast growth factor 7                                 | 0.023727 |
| ENSG00000137500 | CCDC90B    | Coiled-coil domain containing 90B                          | 0.023889 |
| ENSG00000120129 | DUSP1      | Dual specificity phosphatase 1                             | 0.024747 |
| ENSG00000160746 | ANO10      | Anoctamin 10                                               | 0.024981 |
| ENSG00000114841 | DNAH1      | Dynein axonemal heavy chain 1                              | 0.026204 |
| ENSG00000172216 | CEBPB      | CCAAT enhancer binding protein beta                        | 0.02658  |
| ENSG00000119729 | RHOQ       | Ras homolog family member Q                                | 0.026876 |
| ENSG00000141337 | ARSG       | Arylsulfatase G                                            | 0.027492 |
| ENSG00000099625 | CBARP      | CACN subunit beta associated regulatory protein            | 0.027492 |
| ENSG00000099860 | GADD45B    | Growth arrest and DNA damage inducible beta                | 0.028408 |
| ENSG00000184319 | RPL23AP82  | Ribosomal protein L23a pseudogene 82                       | 0.028908 |
| ENSG00000182220 | ATP6AP2    | Atpase H+ transporting accessory protein 2                 | 0.029037 |
| ENSG00000111275 | ALDH2      | Aldehyde dehydrogenase 2 family member                     | 0.029527 |
| ENSG00000162772 | ATF3       | Activating transcription factor 3                          | 0.029783 |
| ENSG00000164181 | ELOVL7     | ELOVL fatty acid elongase 7                                | 0.029969 |
| ENSG00000204815 | TTC25      | Tetratricopeptide repeat domain 25                         | 0.030457 |
| ENSG00000152229 | PSTPIP2    | Proline-serine-threonine phosphatase interacting protein 2 | 0.030546 |
| ENSG00000172738 | TMEM217    | Transmembrane protein 217                                  | 0.030546 |
| ENSG00000078142 | PIK3C3     | Phosphatidylinositol 3-kinase catalytic subunit type 3     | 0.030698 |
| ENSG00000135452 | TSPAN31    | Tetraspanin 31                                             | 0.030926 |
| ENSG00000140945 | CDH13      | Cadherin 13                                                | 0.031045 |
| ENSG00000243970 | PPIEL      | Peptidylprolyl isomerase E like pseudogene                 | 0.031437 |
| ENSG00000228463 | AP006222.1 | Ribosomal protein L23a (RPL23A) pseudogene                 | 0.032863 |

|                               |          |                                                                 |           |
|-------------------------------|----------|-----------------------------------------------------------------|-----------|
| ENSG00000153714               | LURAP1L  | Leucine rich adaptor protein 1 like                             | 0.033138  |
| ENSG00000187479               | C11orf96 | Chromosome 11 open reading frame 96                             | 0.033138  |
| ENSG00000105928               | GSDME    | Gasdermin E                                                     | 0.033901  |
| ENSG00000184557               | SOCS3    | Suppressor of cytokine signaling 3                              | 0.034506  |
| ENSG00000119899               | SLC17A5  | Solute carrier family 17 member 5                               | 0.035611  |
| ENSG00000149968               | MMP3     | Matrix metalloproteinase 3                                      | 0.036731  |
| ENSG00000115107               | STEAP3   | STEAP3 metalloproteinase                                        | 0.037274  |
| ENSG00000196072               | BLOC1S2  | Biogenesis of lysosomal organelles complex 1 subunit 2          | 0.037385  |
| ENSG00000162004               | CCDC78   | Coiled-coil domain containing 78                                | 0.038281  |
| ENSG00000083097               | DOP1A    | DOP1 leucine zipper like protein A                              | 0.039387  |
| ENSG00000120669               | SOHLH2   | Spermatogenesis and oogenesis specific basic helix-loop-helix 2 | 0.039778  |
| ENSG00000044574               | HSPA5    | Heat shock protein family A (Hsp70) member 5                    | 0.040279  |
| ENSG00000100647               | SUSD6    | Sushi domain containing 6                                       | 0.041242  |
| ENSG00000138449               | SLC40A1  | Solute carrier family 40 member 1                               | 0.041272  |
| ENSG00000126785               | RHOJ     | Ras homolog family member J                                     | 0.041803  |
| ENSG00000132793               | LPIN3    | Lipin 3                                                         | 0.042514  |
| ENSG00000139874               | SSTR1    | Somatostatin receptor 1                                         | 0.042888  |
| ENSG00000134070               | IRAK2    | Interleukin 1 receptor associated kinase 2                      | 0.043333  |
| ENSG00000206561               | COLQ     | Collagen like tail subunit of asymmetric acetylcholinesterase   | 0.045497  |
| ENSG00000150681               | RGS18    | Regulator of G protein signaling 18                             | 0.046018  |
| ENSG00000149428               | HYOU1    | Hypoxia up-regulated 1                                          | 0.047357  |
| ENSG00000109323               | MANBA    | Mannosidase beta                                                | 0.047357  |
| ENSG00000091129               | NRCAM    | Neuronal cell adhesion molecule                                 | 0.047357  |
| ENSG00000100298               | APOBEC3H | Apolipoprotein B mRNA editing enzyme catalytic subunit 3H       | 0.047536  |
| ENSG00000198722               | UNC13B   | Unc-13 homolog B                                                | 0.047741  |
| ENSG00000113504               | SLC12A7  | Solute carrier family 12 member 7                               | 0.048192  |
| <b>Down-Regulated Genes</b> ↓ |          |                                                                 |           |
| ENSG00000111665               | CDCA3    | Cell division cycle associated 3                                | 2.18E-103 |
| ENSG00000148773               | MKI67    | Marker of proliferation Ki-67                                   | 2.13E-87  |
| ENSG00000164104               | HMGB2    | High mobility group box 2                                       | 1.47E-69  |
| ENSG00000123485               | HJURP    | Holliday junction recognition protein                           | 4.95E-68  |
| ENSG00000178999               | AURKB    | Aurora kinase B                                                 | 1.18E-65  |
| ENSG00000117399               | CDC20    | Cell division cycle 20                                          | 4.35E-65  |
| ENSG00000101057               | MYBL2    | MYB proto-oncogene like 2                                       | 3.61E-63  |
| ENSG00000105011               | ASF1B    | Anti-silencing function 1B histone chaperone                    | 3.87E-63  |
| ENSG00000127564               | PKMYT1   | Protein kinase, membrane associated tyrosine/threonine 1        | 7.64E-62  |
| ENSG0000013810                | TACC3    | Transforming acidic coiled-coil containing protein 3            | 7.96E-62  |
| ENSG00000134690               | CDCA8    | Cell division cycle associated 8                                | 2.18E-61  |
| ENSG00000145386               | CCNA2    | Cyclin A2                                                       | 3.15E-61  |
| ENSG00000171848               | RRM2     | Ribonucleotide reductase regulatory subunit M2                  | 2.90E-59  |
| ENSG00000075218               | GTSE1    | G2 and S-phase expressed 1                                      | 2.96E-59  |
| ENSG00000113368               | LMNB1    | Lamin B1                                                        | 7.27E-58  |
| ENSG00000146670               | CDCA5    | Cell division cycle associated 5                                | 1.05E-57  |
| ENSG00000166851               | PLK1     | Polo like kinase 1                                              | 1.53E-54  |
| ENSG00000237649               | KIFC1    | Kinesin family member C1                                        | 2.60E-54  |
| ENSG00000011426               | ANLN     | Anillin actin binding protein                                   | 2.81E-54  |
| ENSG00000162063               | CCNF     | Cyclin F                                                        | 1.05E-53  |
| ENSG00000175063               | UBE2C    | Ubiquitin conjugating enzyme E2 C                               | 3.42E-53  |

|                 |          |                                                           |          |
|-----------------|----------|-----------------------------------------------------------|----------|
| ENSG00000111206 | FOXM1    | Forkhead box M1                                           | 1.39E-51 |
| ENSG00000101447 | FAM83D   | Family with sequence similarity 83 member D               | 1.88E-51 |
| ENSG00000161888 | SPC24    | SPC24 component of NDC80 kinetochore complex              | 5.98E-50 |
| ENSG00000088325 | TPX2     | TPX2 microtubule nucleation factor                        | 1.48E-49 |
| ENSG00000137804 | NUSAP1   | Nucleolar and spindle associated protein 1                | 6.72E-49 |
| ENSG00000186185 | KIF18B   | Kinesin family member 18B                                 | 1.75E-48 |
| ENSG00000109805 | NCAPG    | Non-SMC condensin I complex subunit G                     | 4.92E-48 |
| ENSG00000156970 | BUB1B    | BUB1 mitotic checkpoint serine/threonine kinase B         | 7.72E-48 |
| ENSG00000188486 | H2AX     | H2A.X variant histone                                     | 9.64E-48 |
| ENSG00000162073 | PAQR4    | Progesterone and adiponectin receptor family member 4     | 1.48E-47 |
| ENSG00000121152 | NCAPH    | Non-SMC condensin I complex subunit H                     | 4.12E-47 |
| ENSG00000138180 | CEP55    | Centrosomal protein 55                                    | 6.03E-46 |
| ENSG00000170312 | CDK1     | Cyclin dependent kinase 1                                 | 1.50E-45 |
| ENSG00000126787 | DLGAP5   | DLG associated protein 5                                  | 1.77E-44 |
| ENSG00000165480 | SKA3     | Spindle and kinetochore associated complex subunit 3      | 4.20E-43 |
| ENSG00000137807 | KIF23    | Kinesin family member 23                                  | 5.31E-43 |
| ENSG00000122952 | ZWINT    | ZW10 interacting kinetochore protein                      | 8.01E-43 |
| ENSG00000138160 | KIF11    | Kinesin family member 11                                  | 3.03E-42 |
| ENSG00000142945 | KIF2C    | Kinesin family member 2C                                  | 3.39E-42 |
| ENSG00000174371 | EXO1     | Exonuclease 1                                             | 1.54E-41 |
| ENSG00000073111 | MCM2     | Minichromosome maintenance complex component 2            | 1.93E-39 |
| ENSG00000198901 | PRC1     | Protein regulator of cytokinesis 1                        | 3.11E-39 |
| ENSG00000213347 | MXD3     | MAX dimerization protein 3                                | 1.97E-38 |
| ENSG00000276043 | UHRF1    | Ubiquitin like with PHD and ring finger domains 1         | 1.02E-37 |
| ENSG00000112029 | FBXO5    | F-box protein 5                                           | 1.05E-37 |
| ENSG00000165304 | MELK     | Maternal embryonic leucine zipper kinase                  | 1.06E-37 |
| ENSG00000112984 | KIF20A   | Kinesin family member 20A                                 | 3.88E-37 |
| ENSG00000166508 | MCM7     | Minichromosome maintenance complex component 7            | 4.74E-37 |
| ENSG00000161800 | RACGAP1  | Rac gtpase activating protein 1                           | 6.29E-37 |
| ENSG00000101412 | E2F1     | E2F transcription factor 1                                | 1.48E-36 |
| ENSG00000168496 | FEN1     | Flap structure-specific endonuclease 1                    | 4.66E-36 |
| ENSG00000080986 | NDC80    | NDC80 kinetochore complex component                       | 4.96E-36 |
| ENSG00000076382 | SPAG5    | Sperm associated antigen 5                                | 6.41E-36 |
| ENSG00000183856 | IQGAP3   | IQ motif containing gtpase activating protein 3           | 1.37E-35 |
| ENSG00000169679 | BUB1     | BUB1 mitotic checkpoint serine/threonine kinase           | 2.81E-35 |
| ENSG00000090889 | KIF4A    | Kinesin family member 4A                                  | 3.57E-35 |
| ENSG00000140534 | TICRR    | TOPBP1 interacting checkpoint and replication regulator   | 2.17E-34 |
| ENSG00000179750 | APOBEC3B | Apolipoprotein B mRNA editing enzyme catalytic subunit 3B | 5.36E-34 |
| ENSG00000085840 | ORC1     | Origin recognition complex subunit 1                      | 2.93E-33 |
| ENSG00000093009 | CDC45    | Cell division cycle 45                                    | 4.26E-33 |
| ENSG00000131747 | TOP2A    | DNA topoisomerase II alpha                                | 1.01E-32 |
| ENSG00000186193 | SAPCD2   | Suppressor APC domain containing 2                        | 1.25E-32 |
| ENSG00000120802 | TMPO     | Thymopoietin                                              | 1.31E-32 |
| ENSG00000228716 | DHFR     | Dihydrofolate reductase                                   | 3.65E-32 |
| ENSG00000158402 | CDC25C   | Cell division cycle 25C                                   | 9.50E-32 |
| ENSG00000189057 | FAM111B  | Family with sequence similarity 111 member B              | 1.94E-31 |
| ENSG00000135451 | TROAP    | Trophinin associated protein                              | 2.11E-31 |
| ENSG00000129195 | PIMREG   | PICALM interacting mitotic regulator                      | 3.73E-31 |
| ENSG00000131153 | GINS2    | GINS complex subunit 2                                    | 8.11E-31 |
| ENSG00000066279 | ASPM     | Abnormal spindle microtubule assembly                     | 1.28E-30 |

|                 |          |                                                             |          |
|-----------------|----------|-------------------------------------------------------------|----------|
| ENSG00000065328 | MCM10    | Minichromosome maintenance 10 replication initiation factor | 3.54E-30 |
| ENSG00000112118 | MCM3     | Minichromosome maintenance complex component 3              | 2.90E-29 |
| ENSG00000149503 | INCENP   | Inner centromere protein                                    | 6.53E-29 |
| ENSG00000089685 | BIRC5    | Baculoviral IAP repeat containing 5                         | 1.61E-28 |
| ENSG00000071539 | TRIP13   | Thyroid hormone receptor interactor 13                      | 1.71E-28 |
| ENSG00000143228 | NUF2     | NUF2 component of NDC80 kinetochore complex                 | 4.27E-28 |
| ENSG00000007968 | E2F2     | E2F transcription factor 2                                  | 8.22E-28 |
| ENSG00000129173 | E2F8     | E2F transcription factor 8                                  | 8.54E-28 |
| ENSG00000156802 | ATAD2    | Atpase family AAA domain containing 2                       | 1.44E-27 |
| ENSG00000079616 | KIF22    | Kinesin family member 22                                    | 2.80E-27 |
| ENSG00000184661 | CDCA2    | Cell division cycle associated 2                            | 5.96E-27 |
| ENSG00000115163 | CENPA    | Centromere protein A                                        | 7.58E-27 |
| ENSG00000151725 | CENPU    | Centromere protein U                                        | 7.72E-27 |
| ENSG00000092853 | CLSPN    | Claspin                                                     | 2.14E-26 |
| ENSG00000101003 | GIN51    | GIN5 complex subunit 1                                      | 2.64E-26 |
| ENSG00000167670 | CHAF1A   | Chromatin assembly factor 1 subunit A                       | 3.85E-26 |
| ENSG00000182481 | KPNA2    | Karyopherin subunit alpha 2                                 | 6.32E-26 |
| ENSG00000075702 | WDR62    | WD repeat domain 62                                         | 6.59E-26 |
| ENSG00000100162 | CENPM    | Centromere protein M                                        | 1.12E-25 |
| ENSG00000167513 | CDT1     | Chromatin licensing and DNA replication factor 1            | 3.94E-25 |
| ENSG00000170779 | CDCA4    | Cell division cycle associated 4                            | 4.26E-25 |
| ENSG00000117724 | CENPF    | Centromere protein F                                        | 5.46E-25 |
| ENSG00000138778 | CENPE    | Centromere protein E                                        | 5.88E-25 |
| ENSG00000160957 | RECQL4   | Recq like helicase 4                                        | 1.38E-24 |
| ENSG00000165244 | ZNF367   | Zinc finger protein 367                                     | 1.45E-24 |
| ENSG00000187741 | FANCA    | FA complementation group A                                  | 5.08E-24 |
| ENSG00000117650 | NEK2     | NIMA related kinase 2                                       | 7.86E-24 |
| ENSG00000135476 | ESPL1    | Extra spindle pole bodies like 1, separase                  | 7.93E-24 |
| ENSG00000085999 | RAD54L   | RAD54 like                                                  | 8.65E-24 |
| ENSG00000166803 | PCLAF    | PCNA clamp associated factor                                | 8.74E-24 |
| ENSG00000144554 | FANCD2   | FA complementation group D2                                 | 1.32E-23 |
| ENSG00000112742 | TTK      | TTK protein kinase                                          | 1.37E-23 |
| ENSG00000035499 | DEPDC1B  | DEP domain containing 1B                                    | 2.45E-23 |
| ENSG00000094804 | CDC6     | Cell division cycle 6                                       | 5.15E-23 |
| ENSG00000122966 | CIT      | Citron rho-interacting serine/threonine kinase              | 1.10E-22 |
| ENSG00000123219 | CENPK    | Centromere protein K                                        | 1.35E-22 |
| ENSG00000169607 | CKAP2L   | Cytoskeleton associated protein 2 like                      | 1.70E-22 |
| ENSG00000111247 | RAD51AP1 | RAD51 associated protein 1                                  | 2.14E-22 |
| ENSG00000167325 | RRM1     | Ribonucleotide reductase catalytic subunit M1               | 2.71E-22 |
| ENSG00000157456 | CCNB2    | Cyclin B2                                                   | 4.45E-22 |
| ENSG00000168078 | PBK      | PDZ binding kinase                                          | 4.75E-22 |
| ENSG00000171241 | SHCBP1   | SHC binding and spindle associated 1                        | 6.42E-22 |
| ENSG00000184445 | KNTC1    | Kinetochore associated 1                                    | 9.61E-22 |
| ENSG00000175305 | CCNE2    | Cyclin E2                                                   | 1.74E-21 |
| ENSG00000092470 | WDR76    | WD repeat domain 76                                         | 3.30E-21 |
| ENSG00000137135 | ARHGEF39 | Rho guanine nucleotide exchange factor 39                   | 6.74E-21 |
| ENSG00000143476 | DTL      | Denticleless E3 ubiquitin protein ligase homolog            | 1.14E-20 |
| ENSG00000134222 | PSRC1    | Proline and serine rich coiled-coil 1                       | 1.20E-20 |
| ENSG00000051180 | RAD51    | RAD51 recombinase                                           | 1.22E-20 |

|                 |            |                                                                   |          |
|-----------------|------------|-------------------------------------------------------------------|----------|
| ENSG00000186871 | ERCC6L     | ERCC excision repair 6 like, spindle assembly checkpoint helicase | 1.30E-20 |
| ENSG00000213551 | DNAJC9     | Dnaj heat shock protein family (Hsp40) member C9                  | 1.42E-20 |
| ENSG00000133119 | RFC3       | Replication factor C subunit 3                                    | 1.53E-20 |
| ENSG00000106462 | EZH2       | Enhancer of zeste 2 polycomb repressive complex 2 subunit         | 1.53E-20 |
| ENSG00000176619 | LMNB2      | Lamin B2                                                          | 2.35E-20 |
| ENSG00000111602 | TIMELESS   | Timeless circadian regulator                                      | 2.53E-20 |
| ENSG00000149636 | DSN1       | DSN1 component of MIS12 kinetochore complex                       | 2.90E-20 |
| ENSG00000176890 | TYMS       | Thymidylate synthetase                                            | 3.70E-20 |
| ENSG00000131470 | PSMC3IP    | PSMC3 interacting protein                                         | 1.16E-19 |
| ENSG00000136108 | CKAP2      | Cytoskeleton associated protein 2                                 | 1.78E-19 |
| ENSG00000151503 | NCAPD3     | Non-SMC condensin II complex subunit D3                           | 2.30E-19 |
| ENSG00000163808 | KIF15      | Kinesin family member 15                                          | 2.96E-19 |
| ENSG00000101945 | SUV39H1    | Suppressor of variegation 3-9 homolog 1                           | 3.70E-19 |
| ENSG00000104889 | RNASEH2A   | Ribonuclease H2 subunit A                                         | 4.62E-19 |
| ENSG00000077152 | UBE2T      | Ubiquitin conjugating enzyme E2 T                                 | 6.14E-19 |
| ENSG00000159259 | CHAF1B     | Chromatin assembly factor 1 subunit B                             | 6.46E-19 |
| ENSG00000029993 | HMGB3      | High mobility group box 3                                         | 1.71E-18 |
| ENSG00000068489 | PRR11      | Proline rich 11                                                   | 2.43E-18 |
| ENSG00000198056 | PRIM1      | DNA primase subunit 1                                             | 2.85E-18 |
| ENSG00000177602 | HASPIN     | Histone H3 associated protein kinase                              | 5.38E-18 |
| ENSG00000186638 | KIF24      | Kinesin family member 24                                          | 6.01E-18 |
| ENSG00000171320 | ESCO2      | Establishment of sister chromatid cohesion N-acetyltransferase 2  | 1.02E-17 |
| ENSG00000160949 | TONSL      | Tonsoku like, DNA repair protein                                  | 1.73E-17 |
| ENSG00000138182 | KIF20B     | Kinesin family member 20B                                         | 1.92E-17 |
| ENSG00000113810 | SMC4       | Structural maintenance of chromosomes 4                           | 1.94E-17 |
| ENSG00000146918 | NCAPG2     | Non-SMC condensin II complex subunit G2                           | 2.51E-17 |
| ENSG00000160298 | C21orf58   | Chromosome 21 open reading frame 58                               | 3.49E-17 |
| ENSG00000198826 | ARHGAP11A  | Rho gtpase activating protein 11A                                 | 5.47E-17 |
| ENSG00000164087 | POC1A      | POC1 centriolar protein A                                         | 5.98E-17 |
| ENSG00000100297 | MCM5       | Minichromosome maintenance complex component 5                    | 9.98E-17 |
| ENSG00000091651 | ORC6       | Origin recognition complex subunit 6                              | 1.15E-16 |
| ENSG00000144354 | CDCA7      | Cell division cycle associated 7                                  | 1.18E-16 |
| ENSG00000127586 | CHTF18     | Chromosome transmission fidelity factor 18                        | 1.41E-16 |
| ENSG00000123080 | CDKN2C     | Cyclin dependent kinase inhibitor 2C                              | 1.60E-16 |
| ENSG00000138092 | CENPO      | Centromere protein O                                              | 2.72E-16 |
| ENSG00000176974 | SHMT1      | Serine hydroxymethyltransferase 1                                 | 3.69E-16 |
| ENSG00000131351 | HAUS8      | HAUS augmin like complex subunit 8                                | 3.89E-16 |
| ENSG00000170540 | ARL6IP1    | ADP ribosylation factor like gtpase 6 interacting protein 1       | 4.24E-16 |
| ENSG00000134057 | CCNB1      | Cyclin B1                                                         | 4.34E-16 |
| ENSG00000024526 | DEPDC1     | DEP domain containing 1                                           | 4.38E-16 |
| ENSG00000117632 | STMN1      | Stathmin 1                                                        | 7.15E-16 |
| ENSG00000167900 | TK1        | Thymidine kinase 1                                                | 8.56E-16 |
| ENSG00000072571 | HMMR       | Hyaluronan mediated motility receptor                             | 1.24E-15 |
| ENSG00000137812 | KNL1       | Kinetochore scaffold 1                                            | 1.48E-15 |
| ENSG00000284946 | AC068831.8 | Novel protein                                                     | 1.53E-15 |
| ENSG00000119333 | WDR34      | WD repeat domain 34                                               | 4.88E-15 |
| ENSG00000154839 | SKA1       | Spindle and kinetochore associated complex subunit 1              | 4.93E-15 |
| ENSG00000112312 | GMNN       | Geminin DNA replication inhibitor                                 | 6.13E-15 |



|                 |         |                                                                                                 |          |
|-----------------|---------|-------------------------------------------------------------------------------------------------|----------|
| ENSG00000198554 | WDHD1   | WD repeat and HMG-box DNA binding protein 1                                                     | 6.42E-15 |
| ENSG00000104147 | OIP5    | Opa interacting protein 5                                                                       | 6.63E-15 |
| ENSG00000154146 | NRGN    | Neurogranin                                                                                     | 1.05E-14 |
| ENSG00000164611 | PTTG1   | PTTG1 regulator of sister chromatid separation, securin                                         | 1.45E-14 |
| ENSG00000149554 | CHEK1   | Checkpoint kinase 1                                                                             | 1.64E-14 |
| ENSG00000163507 | CIP2A   | Cell proliferation regulating inhibitor of protein phosphatase 2A                               | 1.70E-14 |
| ENSG00000120539 | MASTL   | Microtubule associated serine/threonine kinase like                                             | 3.12E-14 |
| ENSG00000177084 | POLE    | DNA polymerase epsilon, catalytic subunit                                                       | 5.11E-14 |
| ENSG00000196584 | XRCC2   | X-ray repair cross complementing 2                                                              | 7.72E-14 |
| ENSG00000123473 | STIL    | STIL centriolar assembly protein                                                                | 8.12E-14 |
| ENSG00000013573 | DDX11   | DEAD/H-box helicase 11                                                                          | 2.73E-13 |
| ENSG00000163918 | RFC4    | Replication factor C subunit 4                                                                  | 6.02E-13 |
| ENSG00000130816 | DNMT1   | DNA methyltransferase 1                                                                         | 6.33E-13 |
| ENSG00000109674 | NEIL3   | Nei like DNA glycosylase 3                                                                      | 7.28E-13 |
| ENSG00000185347 | TEDC1   | Tubulin epsilon and delta complex 1                                                             | 7.42E-13 |
| ENSG00000101868 | POLA1   | DNA polymerase alpha 1, catalytic subunit                                                       | 1.14E-12 |
| ENSG00000214826 | DDX12P  | DEAD/H-box helicase 12, pseudogene                                                              | 1.22E-12 |
| ENSG00000160447 | PKN3    | Protein kinase N3                                                                               | 1.34E-12 |
| ENSG00000136492 | BRIP1   | BRCA1 interacting protein C-terminal helicase 1                                                 | 2.39E-12 |
| ENSG00000100526 | CDKN3   | Cyclin dependent kinase inhibitor 3                                                             | 2.55E-12 |
| ENSG00000076003 | MCM6    | Minichromosome maintenance complex component 6                                                  | 4.06E-12 |
| ENSG00000105486 | LIG1    | DNA ligase 1                                                                                    | 4.21E-12 |
| ENSG00000119403 | PHF19   | PHD finger protein 19                                                                           | 4.27E-12 |
| ENSG00000125885 | MCM8    | Minichromosome maintenance 8 homologous recombination repair factor                             | 5.13E-12 |
| ENSG00000129810 | SGO1    | Shugoshin 1                                                                                     | 6.31E-12 |
| ENSG00000100714 | MTHFD1  | Methylenetetrahydrofolate dehydrogenase, cyclohydrolase and formyltetrahydrofolate synthetase 1 | 6.58E-12 |
| ENSG00000145861 | C1QTNF2 | C1q and TNF related 2                                                                           | 9.64E-12 |
| ENSG00000164032 | H2AZ1   | H2A.Z variant histone 1                                                                         | 1.16E-11 |
| ENSG00000101224 | CDC25B  | Cell division cycle 25B                                                                         | 1.24E-11 |
| ENSG00000249115 | HAUS5   | HAUS augmin like complex subunit 5                                                              | 1.26E-11 |
| ENSG00000128973 | CLN6    | CLN6 transmembrane ER protein                                                                   | 1.31E-11 |
| ENSG00000162607 | USP1    | Ubiquitin specific peptidase 1                                                                  | 1.61E-11 |
| ENSG00000143799 | PARP1   | Poly(ADP-ribose) polymerase 1                                                                   | 1.72E-11 |
| ENSG00000118193 | KIF14   | Kinesin family member 14                                                                        | 2.19E-11 |
| ENSG00000111445 | RFC5    | Replication factor C subunit 5                                                                  | 3.42E-11 |
| ENSG00000121211 | MND1    | Meiotic nuclear divisions 1                                                                     | 3.43E-11 |
| ENSG00000104738 | MCM4    | Minichromosome maintenance complex component 4                                                  | 3.71E-11 |
| ENSG00000097046 | CDC7    | Cell division cycle 7                                                                           | 3.92E-11 |
| ENSG00000168411 | RFWD3   | Ring finger and WD repeat domain 3                                                              | 4.19E-11 |
| ENSG00000168393 | DTYMK   | Deoxythymidylate kinase                                                                         | 5.37E-11 |
| ENSG00000142731 | PLK4    | Polo like kinase 4                                                                              | 6.21E-11 |
| ENSG00000164045 | CDC25A  | Cell division cycle 25A                                                                         | 6.26E-11 |
| ENSG00000124795 | DEK     | DEK proto-oncogene                                                                              | 7.32E-11 |
| ENSG00000139734 | DIAPH3  | Diaphanous related formin 3                                                                     | 1.10E-10 |
| ENSG00000154920 | EME1    | Essential meiotic structure-specific endonuclease 1                                             | 1.25E-10 |
| ENSG00000075624 | ACTB    | Actin beta                                                                                      | 1.56E-10 |
| ENSG00000153044 | CENPH   | Centromere protein H                                                                            | 1.69E-10 |
| ENSG00000126215 | XRCC3   | X-ray repair cross complementing 3                                                              | 1.80E-10 |

|                 |           |                                                              |          |
|-----------------|-----------|--------------------------------------------------------------|----------|
| ENSG00000080839 | RBL1      | RB transcriptional corepressor like 1                        | 1.86E-10 |
| ENSG00000138376 | BARD1     | BRCA1 associated RING domain 1                               | 1.87E-10 |
| ENSG00000214357 | NEURL1B   | Neutralized E3 ubiquitin protein ligase 1B                   | 2.13E-10 |
| ENSG00000004777 | ARHGAP33  | Rho gtpase activating protein 33                             | 2.16E-10 |
| ENSG00000051341 | POLQ      | DNA polymerase theta                                         | 2.34E-10 |
| ENSG00000130695 | CEP85     | Centrosomal protein 85                                       | 2.71E-10 |
| ENSG00000123975 | CKS2      | CDC28 protein kinase regulatory subunit 2                    | 2.81E-10 |
| ENSG00000062822 | POLD1     | DNA polymerase delta 1, catalytic subunit                    | 2.93E-10 |
| ENSG00000213186 | TRIM59    | Tripartite motif containing 59                               | 3.34E-10 |
| ENSG00000119969 | HELLS     | Helicase, lymphoid specific                                  | 5.58E-10 |
| ENSG00000163950 | SLBP      | Stem-loop binding protein                                    | 5.84E-10 |
| ENSG00000132780 | NASP      | Nuclear autoantigenic sperm protein                          | 6.00E-10 |
| ENSG00000183763 | TRAIIP    | TRAF interacting protein                                     | 6.57E-10 |
| ENSG00000100629 | CEP128    | Centrosomal protein 128                                      | 6.79E-10 |
| ENSG00000118655 | DCLRE1B   | DNA cross-link repair 1B                                     | 6.80E-10 |
| ENSG00000164109 | MAD2L1    | Mitotic arrest deficient 2 like 1                            | 7.09E-10 |
| ENSG00000040275 | SPDL1     | Spindle apparatus coiled-coil protein 1                      | 7.34E-10 |
| ENSG00000185361 | TNFAIP8L1 | TNF alpha induced protein 8 like 1                           | 8.82E-10 |
| ENSG00000159055 | MIS18A    | MIS18 kinetochore protein A                                  | 1.21E-09 |
| ENSG00000180198 | RCC1      | Regulator of chromosome condensation 1                       | 1.32E-09 |
| ENSG00000126453 | BCL2L12   | BCL2 like 12                                                 | 1.76E-09 |
| ENSG00000203760 | CENPW     | Centromere protein W                                         | 1.77E-09 |
| ENSG00000173207 | CKS1B     | CDC28 protein kinase regulatory subunit 1B                   | 1.88E-09 |
| ENSG00000140451 | PIF1      | PIF1 5'-to-3' DNA helicase                                   | 2.10E-09 |
| ENSG00000166451 | CENPN     | Centromere protein N                                         | 2.63E-09 |
| ENSG00000161692 | DBF4B     | DBF4 zinc finger B                                           | 3.59E-09 |
| ENSG00000136824 | SMC2      | Structural maintenance of chromosomes 2                      | 4.40E-09 |
| ENSG00000139354 | GAS2L3    | Growth arrest specific 2 like 3                              | 4.76E-09 |
| ENSG00000161547 | SRSF2     | Serine and arginine rich splicing factor 2                   | 6.59E-09 |
| ENSG00000120334 | CENPL     | Centromere protein L                                         | 7.90E-09 |
| ENSG00000173894 | CBX2      | Chromobox 2                                                  | 8.93E-09 |
| ENSG00000182963 | GJC1      | Gap junction protein gamma 1                                 | 9.52E-09 |
| ENSG00000123136 | DDX39A    | Dexd-box helicase 39A                                        | 9.61E-09 |
| ENSG00000134291 | TMEM106C  | Transmembrane protein 106C                                   | 9.93E-09 |
| ENSG00000143401 | ANP32E    | Acidic nuclear phosphoprotein 32 family member E             | 1.07E-08 |
| ENSG00000049541 | RFC2      | Replication factor C subunit 2                               | 1.45E-08 |
| ENSG00000058804 | NDC1      | NDC1 transmembrane nucleoporin                               | 1.83E-08 |
| ENSG00000111331 | OAS3      | 2'-5'-oligoadenylate synthetase 3                            | 2.07E-08 |
| ENSG00000096060 | FKBP5     | FKBP prolyl isomerase 5                                      | 2.38E-08 |
| ENSG00000162062 | TEDC2     | Tubulin epsilon and delta complex 2                          | 2.56E-08 |
| ENSG00000095002 | MSH2      | Muts homolog 2                                               | 2.65E-08 |
| ENSG00000158164 | TMSB15A   | Thymosin beta 15a                                            | 3.11E-08 |
| ENSG00000188229 | TUBB4B    | Tubulin beta 4B class ivb                                    | 3.39E-08 |
| ENSG00000109881 | CCDC34    | Coiled-coil domain containing 34                             | 3.43E-08 |
| ENSG00000176887 | SOX11     | SRY-box transcription factor 11                              | 3.64E-08 |
| ENSG00000014138 | POLA2     | DNA polymerase alpha 2, accessory subunit                    | 5.71E-08 |
| ENSG00000102384 | CENPI     | Centromere protein I                                         | 6.00E-08 |
| ENSG00000197299 | BLM       | BLM recq like helicase                                       | 6.72E-08 |
| ENSG00000100350 | FOXRED2   | FAD dependent oxidoreductase domain containing 2             | 7.02E-08 |
| ENSG00000012963 | UBR7      | Ubiquitin protein ligase E3 component n-recogin 7 (putative) | 9.52E-08 |

|                 |            |                                                                            |          |
|-----------------|------------|----------------------------------------------------------------------------|----------|
| ENSG00000166845 | C18orf54   | Chromosome 18 open reading frame 54                                        | 1.01E-07 |
| ENSG00000128245 | YWHAH      | Tyrosine 3-monooxygenase/tryptophan 5-monooxygenase activation protein eta | 1.26E-07 |
| ENSG00000136699 | SMPD4      | Sphingomyelin phosphodiesterase 4                                          | 1.40E-07 |
| ENSG00000000460 | C1orf112   | Chromosome 1 open reading frame 112                                        | 1.42E-07 |
| ENSG00000109084 | TMEM97     | Transmembrane protein 97                                                   | 1.69E-07 |
| ENSG00000127423 | AUNIP      | Aurora kinase A and ninein interacting protein                             | 1.95E-07 |
| ENSG00000213390 | ARHGAP19   | Rho gtpase activating protein 19                                           | 2.55E-07 |
| ENSG00000163535 | SGO2       | Shugoshin 2                                                                | 2.82E-07 |
| ENSG00000083720 | OXCT1      | 3-oxoacid coa-transferase 1                                                | 3.01E-07 |
| ENSG00000168077 | SCARA3     | Scavenger receptor class A member 3                                        | 3.60E-07 |
| ENSG00000140525 | FANCI      | FA complementation group I                                                 | 3.66E-07 |
| ENSG00000198176 | TFDP1      | Transcription factor Dp-1                                                  | 4.02E-07 |
| ENSG00000167747 | C19orf48   | Chromosome 19 open reading frame 48                                        | 4.17E-07 |
| ENSG00000128944 | KNSTRN     | Kinetochores localized astrin (SPAG5) binding protein                      | 4.53E-07 |
| ENSG00000125319 | HROB       | Homologous recombination factor with OB-fold                               | 5.11E-07 |
| ENSG00000108106 | UBE2S      | Ubiquitin conjugating enzyme E2 S                                          | 5.58E-07 |
| ENSG00000188807 | TMEM201    | Transmembrane protein 201                                                  | 5.83E-07 |
| ENSG00000164985 | PSIP1      | PC4 and SFRS1 interacting protein 1                                        | 6.21E-07 |
| ENSG00000259781 | HMGB1P6    | High mobility group box 1 pseudogene 6                                     | 6.29E-07 |
| ENSG00000010292 | NCAPD2     | Non-SMC condensin I complex subunit D2                                     | 6.46E-07 |
| ENSG00000285920 | AC087721.2 | Novel protein                                                              | 6.72E-07 |
| ENSG00000114346 | ECT2       | Epithelial cell transforming 2                                             | 7.29E-07 |
| ENSG00000165490 | DDIAS      | DNA damage induced apoptosis suppressor                                    | 8.02E-07 |
| ENSG00000149929 | HIRIP3     | HIRA interacting protein 3                                                 | 8.24E-07 |
| ENSG00000221829 | FANCG      | FA complementation group G                                                 | 8.41E-07 |
| ENSG00000174442 | ZWILCH     | Zwilch kinetochores protein                                                | 8.99E-07 |
| ENSG00000196230 | TUBB       | Tubulin beta class I                                                       | 1.22E-06 |
| ENSG00000146410 | MTFR2      | Mitochondrial fission regulator 2                                          | 1.26E-06 |
| ENSG00000130402 | ACTN4      | Actinin alpha 4                                                            | 1.30E-06 |
| ENSG00000198830 | HMGN2      | High mobility group nucleosomal binding domain 2                           | 1.44E-06 |
| ENSG00000025770 | NCAPH2     | Non-SMC condensin II complex subunit H2                                    | 1.70E-06 |
| ENSG00000136982 | DSCC1      | DNA replication and sister chromatid cohesion 1                            | 1.94E-06 |
| ENSG00000184216 | IRAK1      | Interleukin 1 receptor associated kinase 1                                 | 2.16E-06 |
| ENSG00000106144 | CASP2      | Caspase 2                                                                  | 2.40E-06 |
| ENSG00000011304 | PTBP1      | Polypyrimidine tract binding protein 1                                     | 3.14E-06 |
| ENSG00000153048 | CARHSP1    | Calcium regulated heat stable protein 1                                    | 3.23E-06 |
| ENSG00000182010 | RTKN2      | Rhotekin 2                                                                 | 4.48E-06 |
| ENSG00000077514 | POLD3      | DNA polymerase delta 3, accessory subunit                                  | 4.73E-06 |
| ENSG00000128951 | DUT        | Deoxyuridine triphosphatase                                                | 4.73E-06 |
| ENSG00000189403 | HMGB1      | High mobility group box 1                                                  | 5.17E-06 |
| ENSG00000187514 | PTMA       | Prothymosin alpha                                                          | 5.42E-06 |
| ENSG00000129534 | MIS18BP1   | MIS18 binding protein 1                                                    | 5.47E-06 |
| ENSG00000213853 | EMP2       | Epithelial membrane protein 2                                              | 5.72E-06 |
| ENSG00000087586 | AURKA      | Aurora kinase A                                                            | 5.96E-06 |
| ENSG00000012048 | BRCA1      | BRCA1 DNA repair associated                                                | 5.99E-06 |
| ENSG00000076248 | UNG        | Uracil DNA glycosylase                                                     | 6.63E-06 |
| ENSG00000183048 | SLC25A10   | Solute carrier family 25 member 10                                         | 7.67E-06 |
| ENSG00000158246 | TENT5B     | Terminal nucleotidyltransferase 5B                                         | 9.14E-06 |
| ENSG00000096433 | ITPR3      | Inositol 1,4,5-trisphosphate receptor type 3                               | 9.55E-06 |
| ENSG00000143554 | SLC27A3    | Solute carrier family 27 member 3                                          | 9.75E-06 |

|                 |          |                                                                    |          |
|-----------------|----------|--------------------------------------------------------------------|----------|
| ENSG00000061337 | LZTS1    | Leucine zipper tumor suppressor 1                                  | 1.01E-05 |
| ENSG00000092820 | EZR      | Ezrin                                                              | 1.02E-05 |
| ENSG00000166881 | NEMP1    | Nuclear envelope integral membrane protein 1                       | 1.09E-05 |
| ENSG00000132436 | FIGNL1   | Fidgetin like 1                                                    | 1.17E-05 |
| ENSG00000146263 | MMS22L   | MMS22 like, DNA repair protein                                     | 1.37E-05 |
| ENSG00000121957 | GPSM2    | G protein signaling modulator 2                                    | 1.37E-05 |
| ENSG00000144395 | CCDC150  | Coiled-coil domain containing 150                                  | 1.54E-05 |
| ENSG00000117748 | RPA2     | Replication protein A2                                             | 1.56E-05 |
| ENSG00000205208 | C4orf46  | Chromosome 4 open reading frame 46                                 | 1.76E-05 |
| ENSG00000184635 | ZNF93    | Zinc finger protein 93                                             | 1.90E-05 |
| ENSG00000166483 | WEE1     | WEE1 G2 checkpoint kinase                                          | 1.91E-05 |
| ENSG00000099901 | RANBP1   | RAN binding protein 1                                              | 2.03E-05 |
| ENSG00000184162 | NR2C2AP  | Nuclear receptor 2C2 associated protein                            | 2.32E-05 |
| ENSG00000169258 | GPRIN1   | G protein regulated inducer of neurite outgrowth 1                 | 2.53E-05 |
| ENSG00000123416 | TUBA1B   | Tubulin alpha 1b                                                   | 3.18E-05 |
| ENSG00000100749 | VRK1     | VRK serine/threonine kinase 1                                      | 3.46E-05 |
| ENSG00000165891 | E2F7     | E2F transcription factor 7                                         | 3.99E-05 |
| ENSG00000099783 | HNRNPM   | Heterogeneous nuclear ribonucleoprotein M                          | 4.28E-05 |
| ENSG00000141560 | FN3KRP   | Fructosamine 3 kinase related protein                              | 4.29E-05 |
| ENSG00000181938 | GINS3    | GINS complex subunit 3                                             | 4.73E-05 |
| ENSG00000123737 | EXOSC9   | Exosome component 9                                                | 4.74E-05 |
| ENSG00000137563 | GGH      | Gamma-glutamyl hydrolase                                           | 4.79E-05 |
| ENSG00000167553 | TUBA1C   | Tubulin alpha 1c                                                   | 5.13E-05 |
| ENSG00000164649 | CDCA7L   | Cell division cycle associated 7 like                              | 5.15E-05 |
| ENSG00000123374 | CDK2     | Cyclin dependent kinase 2                                          | 5.77E-05 |
| ENSG00000164105 | SAP30    | Sin3A associated protein 30                                        | 5.91E-05 |
| ENSG00000133026 | MYH10    | Myosin heavy chain 10                                              | 6.11E-05 |
| ENSG00000213024 | NUP62    | Nucleoporin 62                                                     | 6.22E-05 |
| ENSG00000124207 | CSE1L    | Chromosome segregation 1 like                                      | 6.71E-05 |
| ENSG00000079462 | PAFAH1B3 | Platelet activating factor acetylhydrolase 1b catalytic subunit 3  | 7.23E-05 |
| ENSG00000105968 | H2AZ2    | H2A.Z variant histone 2                                            | 7.56E-05 |
| ENSG00000035928 | RFC1     | Replication factor C subunit 1                                     | 7.74E-05 |
| ENSG00000121774 | KHDRBS1  | KH RNA binding domain containing, signal transduction associated 1 | 8.00E-05 |
| ENSG00000121621 | KIF18A   | Kinesin family member 18A                                          | 9.17E-05 |
| ENSG00000175592 | FOSL1    | FOS like 1, AP-1 transcription factor subunit                      | 0.000108 |
| ENSG00000148019 | CEP78    | Centrosomal protein 78                                             | 0.000111 |
| ENSG00000186767 | SPIN4    | Spindlin family member 4                                           | 0.000127 |
| ENSG00000053438 | NNAT     | Neuronatin                                                         | 0.000133 |
| ENSG00000161618 | ALDH16A1 | Aldehyde dehydrogenase 16 family member A1                         | 0.000133 |
| ENSG00000111581 | NUP107   | Nucleoporin 107                                                    | 0.000136 |
| ENSG00000115875 | SRSF7    | Serine and arginine rich splicing factor 7                         | 0.000136 |
| ENSG00000197275 | RAD54B   | RAD54 homolog B                                                    | 0.000155 |
| ENSG00000185480 | PARPBP   | PARP1 binding protein                                              | 0.000171 |
| ENSG00000086475 | SEPHS1   | Selenophosphate synthetase 1                                       | 0.000175 |
| ENSG00000135045 | C9orf40  | Chromosome 9 open reading frame 40                                 | 0.000185 |
| ENSG00000242114 | MTFP1    | Mitochondrial fission process 1                                    | 0.000197 |
| ENSG00000108055 | SMC3     | Structural maintenance of chromosomes 3                            | 0.000198 |
| ENSG00000185262 | UBALD2   | UBA like domain containing 2                                       | 0.00022  |
| ENSG00000163781 | TOPBP1   | DNA topoisomerase II binding protein 1                             | 0.000231 |

|                 |          |                                                           |          |
|-----------------|----------|-----------------------------------------------------------|----------|
| ENSG00000113569 | NUP155   | Nucleoporin 155                                           | 0.000241 |
| ENSG00000183963 | SMTN     | Smoothelin                                                | 0.000247 |
| ENSG00000116237 | ICMT     | Isoprenylcysteine carboxyl methyltransferase              | 0.000278 |
| ENSG00000275591 | XKR5     | XK related 5                                              | 0.00029  |
| ENSG00000089280 | FUS      | FUS RNA binding protein                                   | 0.00029  |
| ENSG00000112759 | SLC29A1  | Solute carrier family 29 member 1 (Augustine blood group) | 0.000291 |
| ENSG00000197771 | MCMBP    | Minichromosome maintenance complex binding protein        | 0.000301 |
| ENSG00000006634 | DBF4     | DBF4 zinc finger                                          | 0.000306 |
| ENSG00000159147 | DONSON   | Downstream neighbor of SON                                | 0.000309 |
| ENSG00000075131 | TIPIN    | TIMELESS interacting protein                              | 0.000311 |
| ENSG00000173456 | RNF26    | Ring finger protein 26                                    | 0.000325 |
| ENSG00000005189 | REXO5    | RNA exonuclease 5                                         | 0.000353 |
| ENSG00000137814 | HAUS2    | HAUS augmin like complex subunit 2                        | 0.000358 |
| ENSG00000156136 | DCK      | Deoxycytidine kinase                                      | 0.000368 |
| ENSG00000151287 | TEX30    | Testis expressed 30                                       | 0.000375 |
| ENSG00000184992 | BRI3BP   | BRI3 binding protein                                      | 0.000399 |
| ENSG00000206053 | JPT2     | Jupiter microtubule associated homolog 2                  | 0.000403 |
| ENSG00000108179 | PPIF     | Peptidylprolyl isomerase F                                | 0.000415 |
| ENSG00000156876 | SASS6    | SAS-6 centriolar assembly protein                         | 0.000451 |
| ENSG00000116133 | DHCR24   | 24-dehydrocholesterol reductase                           | 0.000461 |
| ENSG00000184897 | H1-10    | H1.10 linker histone                                      | 0.000499 |
| ENSG00000138658 | ZGRF1    | Zinc finger GRF-type containing 1                         | 0.000545 |
| ENSG00000149136 | SSRP1    | Structure specific recognition protein 1                  | 0.000582 |
| ENSG00000277443 | MARCKS   | Myristoylated alanine rich protein kinase C substrate     | 0.000584 |
| ENSG00000092201 | SUPT16H  | SPT16 homolog, facilitates chromatin remodeling subunit   | 0.000593 |
| ENSG00000031691 | CENPQ    | Centromere protein Q                                      | 0.000598 |
| ENSG00000136861 | CDK5RAP2 | CDK5 regulatory subunit associated protein 2              | 0.000733 |
| ENSG00000115687 | PASK     | PAS domain containing serine/threonine kinase             | 0.000756 |
| ENSG00000168476 | REEP4    | Receptor accessory protein 4                              | 0.000757 |
| ENSG00000141556 | TBCD     | Tubulin folding cofactor D                                | 0.000779 |
| ENSG00000131462 | TUBG1    | Tubulin gamma 1                                           | 0.000839 |
| ENSG00000176208 | ATAD5    | Atpase family AAA domain containing 5                     | 0.000881 |
| ENSG00000125450 | NUP85    | Nucleoporin 85                                            | 0.000948 |
| ENSG00000178966 | RMI1     | Recq mediated genome instability 1                        | 0.000983 |
| ENSG00000142856 | ITGB3BP  | Integrin subunit beta 3 binding protein                   | 0.001004 |
| ENSG00000132341 | RAN      | RAN, member RAS oncogene family                           | 0.001072 |
| ENSG00000100242 | SUN2     | Sad1 and UNC84 domain containing 2                        | 0.001084 |
| ENSG00000068028 | RASSF1   | Ras association domain family member 1                    | 0.001096 |
| ENSG00000125347 | IRF1     | Interferon regulatory factor 1                            | 0.001204 |
| ENSG00000134802 | SLC43A3  | Solute carrier family 43 member 3                         | 0.00125  |
| ENSG00000141499 | WRAP53   | WD repeat containing antisense to TP53                    | 0.001402 |
| ENSG00000110108 | TMEM109  | Transmembrane protein 109                                 | 0.001608 |
| ENSG00000253304 | TMEM200B | Transmembrane protein 200B                                | 0.00168  |
| ENSG00000138668 | HNRNPD   | Heterogeneous nuclear ribonucleoprotein D                 | 0.001742 |
| ENSG00000132383 | RPA1     | Replication protein A1                                    | 0.001825 |
| ENSG00000054967 | RELT     | RELT TNF receptor                                         | 0.001825 |
| ENSG00000104081 | BMF      | Bcl2 modifying factor                                     | 0.001825 |
| ENSG00000129484 | PARP2    | Poly(ADP-ribose) polymerase 2                             | 0.001969 |
| ENSG00000160392 | C19orf47 | Chromosome 19 open reading frame 47                       | 0.001986 |
| ENSG00000169813 | HNRNPF   | Heterogeneous nuclear ribonucleoprotein F                 | 0.001986 |

|                 |            |                                                     |          |
|-----------------|------------|-----------------------------------------------------|----------|
| ENSG0000005022  | SLC25A5    | Solute carrier family 25 member 5                   | 0.002021 |
| ENSG00000136122 | BORA       | BORA aurora kinase A activator                      | 0.002034 |
| ENSG00000151849 | CENPJ      | Centromere protein J                                | 0.002065 |
| ENSG00000173848 | NET1       | Neuroepithelial cell transforming 1                 | 0.002078 |
| ENSG00000101773 | RBBP8      | RB binding protein 8, endonuclease                  | 0.00212  |
| ENSG00000147536 | GINS4      | GINS complex subunit 4                              | 0.002139 |
| ENSG00000160352 | ZNF714     | Zinc finger protein 714                             | 0.00216  |
| ENSG00000070814 | TCOF1      | Treacle ribosome biogenesis factor 1                | 0.002176 |
| ENSG00000179409 | GEMIN4     | Gem nuclear organelle associated protein 4          | 0.002248 |
| ENSG00000136527 | TRA2B      | Transformer 2 beta homolog                          | 0.002288 |
| ENSG00000176894 | PXMP2      | Peroxisomal membrane protein 2                      | 0.002301 |
| ENSG00000172009 | THOP1      | Thimet oligopeptidase 1                             | 0.002351 |
| ENSG00000112039 | FANCE      | FA complementation group E                          | 0.002427 |
| ENSG00000105173 | CCNE1      | Cyclin E1                                           | 0.00243  |
| ENSG00000109685 | NSD2       | Nuclear receptor binding SET domain protein 2       | 0.002641 |
| ENSG00000100479 | POLE2      | DNA polymerase epsilon 2, accessory subunit         | 0.002647 |
| ENSG00000215784 | FAM72D     | Family with sequence similarity 72 member D         | 0.002685 |
| ENSG00000136518 | ACTL6A     | Actin like 6A                                       | 0.002756 |
| ENSG00000103995 | CEP152     | Centrosomal protein 152                             | 0.00278  |
| ENSG00000125898 | FAM110A    | Family with sequence similarity 110 member A        | 0.002874 |
| ENSG00000151702 | FLI1       | Fli-1 proto-oncogene, ETS transcription factor      | 0.003093 |
| ENSG00000126822 | PLEKHG3    | Pleckstrin homology and rhoGef domain containing G3 | 0.003149 |
| ENSG00000154473 | BUB3       | BUB3 mitotic checkpoint protein                     | 0.003235 |
| ENSG00000140365 | COMMD4     | COMM domain containing 4                            | 0.003242 |
| ENSG00000126216 | TUBGCP3    | Tubulin gamma complex associated protein 3          | 0.003404 |
| ENSG00000187790 | FANCM      | FA complementation group M                          | 0.003445 |
| ENSG00000156509 | FBXO43     | F-box protein 43                                    | 0.00345  |
| ENSG00000156381 | ANKRD9     | Ankyrin repeat domain 9                             | 0.003664 |
| ENSG00000104626 | ERI1       | Exoribonuclease 1                                   | 0.00371  |
| ENSG00000175216 | CKAP5      | Cytoskeleton associated protein 5                   | 0.003755 |
| ENSG00000117877 | CD3EAP     | CD3e molecule associated protein                    | 0.003817 |
| ENSG00000102007 | PLP2       | Proteolipid protein 2                               | 0.003947 |
| ENSG00000114999 | TTL        | Tubulin tyrosine ligase                             | 0.003956 |
| ENSG00000155561 | NUP205     | Nucleoporin 205                                     | 0.003987 |
| ENSG00000149548 | CCDC15     | Coiled-coil domain containing 15                    | 0.004037 |
| ENSG00000182054 | IDH2       | Isocitrate dehydrogenase (NADP(+)) 2                | 0.004037 |
| ENSG00000051596 | THOC3      | THO complex 3                                       | 0.004277 |
| ENSG00000161996 | WDR90      | WD repeat domain 90                                 | 0.004285 |
| ENSG00000198885 | ITPRIPL1   | ITPRIP like 1                                       | 0.0044   |
| ENSG00000142149 | HUNK       | Hormonally up-regulated Neu-associated kinase       | 0.00441  |
| ENSG00000025772 | TOMM34     | Translocase of outer mitochondrial membrane 34      | 0.004497 |
| ENSG00000248710 | AC079594.2 | TRIM59 and ift80 readthrough                        | 0.004565 |
| ENSG00000119326 | CTNNAL1    | Catenin alpha like 1                                | 0.004758 |
| ENSG00000102900 | NUP93      | Nucleoporin 93                                      | 0.004808 |
| ENSG00000159231 | CBR3       | Carbonyl reductase 3                                | 0.004817 |
| ENSG00000149596 | JPH2       | Junctophilin 2                                      | 0.004928 |
| ENSG00000103121 | CMC2       | C-X9-C motif containing 2                           | 0.005154 |
| ENSG00000102974 | CTCF       | CCCTC-binding factor                                | 0.005154 |
| ENSG00000142733 | MAP3K6     | Mitogen-activated protein kinase kinase kinase 6    | 0.005354 |
| ENSG00000136450 | SRSF1      | Serine and arginine rich splicing factor 1          | 0.005354 |
| ENSG00000143815 | LBR        | Lamin B receptor                                    | 0.005399 |

|                 |            |                                                                |          |
|-----------------|------------|----------------------------------------------------------------|----------|
| ENSG00000064666 | CNN2       | Calponin 2                                                     | 0.005641 |
| ENSG00000138796 | HADH       | Hydroxyacyl-coa dehydrogenase                                  | 0.005689 |
| ENSG00000142230 | SAE1       | SUMO1 activating enzyme subunit 1                              | 0.005742 |
| ENSG00000120437 | ACAT2      | Acetyl-coa acetyltransferase 2                                 | 0.005944 |
| ENSG00000284491 | THSD8      | Thrombospondin type 1 domain containing 8                      | 0.006122 |
| ENSG00000136811 | ODF2       | Outer dense fiber of sperm tails 2                             | 0.006324 |
| ENSG00000151466 | SCLT1      | Sodium channel and clathrin linker 1                           | 0.006372 |
| ENSG00000106628 | POLD2      | DNA polymerase delta 2, accessory subunit                      | 0.006372 |
| ENSG00000239306 | RBM14      | RNA binding motif protein 14                                   | 0.006383 |
| ENSG00000005059 | MCUB       | Mitochondrial calcium uniporter dominant negative beta subunit | 0.006408 |
| ENSG00000100401 | RANGAP1    | Ran gtpase activating protein 1                                | 0.006465 |
| ENSG00000184009 | ACTG1      | Actin gamma 1                                                  | 0.006504 |
| ENSG00000147155 | EBP        | EBP cholestenol delta-isomerase                                | 0.006573 |
| ENSG00000171388 | APLN       | Apelin                                                         | 0.006642 |
| ENSG00000213160 | KLHL23     | Kelch like family member 23                                    | 0.006672 |
| ENSG00000171649 | ZIK1       | Zinc finger protein interacting with K protein 1               | 0.006678 |
| ENSG00000122483 | CCDC18     | Coiled-coil domain containing 18                               | 0.006996 |
| ENSG00000171793 | CTPS1      | CTP synthase 1                                                 | 0.007255 |
| ENSG00000165501 | LRR1       | Leucine rich repeat protein 1                                  | 0.007324 |
| ENSG00000132017 | DCAF15     | DDB1 and CUL4 associated factor 15                             | 0.00734  |
| ENSG00000108468 | CBX1       | Chromobox 1                                                    | 0.007358 |
| ENSG00000136159 | NUDT15     | Nudix hydrolase 15                                             | 0.007576 |
| ENSG00000136715 | SAP130     | Sin3A associated protein 130                                   | 0.007802 |
| ENSG00000169683 | LRRC45     | Leucine rich repeat containing 45                              | 0.007919 |
| ENSG00000174013 | FBXO45     | F-box protein 45                                               | 0.00816  |
| ENSG00000075618 | FSCN1      | Fascin actin-bundling protein 1                                | 0.008264 |
| ENSG00000163002 | NUP35      | Nucleoporin 35                                                 | 0.008337 |
| ENSG00000205476 | CCDC85C    | Coiled-coil domain containing 85C                              | 0.008337 |
| ENSG00000131504 | DIAPH1     | Diaphanous related formin 1                                    | 0.008364 |
| ENSG00000100304 | TTL12      | Tubulin tyrosine ligase like 12                                | 0.008527 |
| ENSG00000166833 | NAV2       | Neuron navigator 2                                             | 0.008651 |
| ENSG00000011332 | DPF1       | Double PHD fingers 1                                           | 0.008712 |
| ENSG00000095319 | NUP188     | Nucleoporin 188                                                | 0.008725 |
| ENSG00000197451 | HNRNPAB    | Heterogeneous nuclear ribonucleoprotein A/B                    | 0.00947  |
| ENSG00000116670 | MAD2L2     | Mitotic arrest deficient 2 like 2                              | 0.009539 |
| ENSG00000180998 | GPR137C    | G protein-coupled receptor 137C                                | 0.009912 |
| ENSG00000172687 | ZNF738     | Zinc finger protein 738                                        | 0.009912 |
| ENSG00000088247 | KHSRP      | KH-type splicing regulatory protein                            | 0.009973 |
| ENSG00000101407 | TTI1       | TELO2 interacting protein 1                                    | 0.010043 |
| ENSG00000166801 | FAM111A    | Family with sequence similarity 111 member A                   | 0.010294 |
| ENSG00000129355 | CDKN2D     | Cyclin dependent kinase inhibitor 2D                           | 0.010324 |
| ENSG00000128408 | RIBC2      | RIB43A domain with coiled-coils 2                              | 0.010623 |
| ENSG00000136938 | ANP32B     | Acidic nuclear phosphoprotein 32 family member B               | 0.010943 |
| ENSG00000163923 | RPL39L     | Ribosomal protein L39 like                                     | 0.011078 |
| ENSG00000111788 | AC009533.1 | DEAD/H (Asp-Glu-Ala-Asp/His) box polypeptide like pseudogene   | 0.011081 |
| ENSG00000183814 | LIN9       | Lin-9 DREAM muvb core complex component                        | 0.011502 |
| ENSG00000105323 | HNRNPUL1   | Heterogeneous nuclear ribonucleoprotein U like 1               | 0.011502 |
| ENSG00000170379 | TCAF2      | TRPM8 channel associated factor 2                              | 0.011704 |
| ENSG00000267041 | ZNF850     | Zinc finger protein 850                                        | 0.01177  |

|                 |            |                                                                    |          |
|-----------------|------------|--------------------------------------------------------------------|----------|
| ENSG00000198331 | HYLS1      | HYLS1 centriolar and ciliogenesis associated                       | 0.011836 |
| ENSG00000164002 | EXO5       | Exonuclease 5                                                      | 0.01195  |
| ENSG00000117593 | DARS2      | Aspartyl-trna synthetase 2, mitochondrial                          | 0.011999 |
| ENSG00000138587 | MNS1       | Meiosis specific nuclear structural 1                              | 0.012054 |
| ENSG00000133392 | MYH11      | Myosin heavy chain 11                                              | 0.012167 |
| ENSG00000044459 | CNTLN      | Centlein                                                           | 0.012396 |
| ENSG00000196363 | WDR5       | WD repeat domain 5                                                 | 0.012396 |
| ENSG00000101004 | NINL       | Ninein like                                                        | 0.012575 |
| ENSG00000138780 | GSTCD      | Glutathione S-transferase C-terminal domain containing             | 0.012814 |
| ENSG00000164742 | ADCY1      | Adenylate cyclase 1                                                | 0.012936 |
| ENSG00000061918 | GUCY1B1    | Guanylate cyclase 1 soluble subunit beta 1                         | 0.012936 |
| ENSG00000164053 | ATRIP      | ATR interacting protein                                            | 0.013591 |
| ENSG00000135801 | TAF5L      | TATA-box binding protein associated factor 5 like                  | 0.013811 |
| ENSG00000112081 | SRSF3      | Serine and arginine rich splicing factor 3                         | 0.013855 |
| ENSG00000106459 | NRF1       | Nuclear respiratory factor 1                                       | 0.01391  |
| ENSG00000183688 | RFLNB      | Refilin B                                                          | 0.014333 |
| ENSG00000170144 | HNRNPA3    | Heterogeneous nuclear ribonucleoprotein A3                         | 0.014552 |
| ENSG00000101361 | NOP56      | NOP56 ribonucleoprotein                                            | 0.015183 |
| ENSG00000135744 | AGT        | Angiotensinogen                                                    | 0.015251 |
| ENSG00000143321 | HDGF       | Heparin binding growth factor                                      | 0.015251 |
| ENSG00000167088 | SNRPD1     | Small nuclear ribonucleoprotein D1 polypeptide                     | 0.015445 |
| ENSG00000285035 | AC091057.6 | Serine/threonine-protein kinase ULK4 (ULK4), pseudogene            | 0.015448 |
| ENSG00000217555 | CKLF       | Chemokine like factor                                              | 0.015563 |
| ENSG00000177613 | CSTF2T     | Cleavage stimulation factor subunit 2 tau variant                  | 0.015683 |
| ENSG00000183955 | KMT5A      | Lysine methyltransferase 5A                                        | 0.016031 |
| ENSG00000187676 | B3GLCT     | Beta 3-glucosyltransferase                                         | 0.016838 |
| ENSG00000166889 | PATL1      | PAT1 homolog 1, processing body mrna decay factor                  | 0.01728  |
| ENSG00000152455 | SUV39H2    | Suppressor of variegation 3-9 homolog 2                            | 0.017679 |
| ENSG00000176225 | RTTN       | Rotatin                                                            | 0.018559 |
| ENSG00000138346 | DNA2       | DNA replication helicase/nuclease 2                                | 0.018897 |
| ENSG00000099849 | RASSF7     | Ras association domain family member 7                             | 0.019598 |
| ENSG00000182575 | NXPH3      | Neurexophilin 3                                                    | 0.020821 |
| ENSG00000198055 | GRK6       | G protein-coupled receptor kinase 6                                | 0.021082 |
| ENSG00000183496 | MEX3B      | Mex-3 RNA binding family member B                                  | 0.021203 |
| ENSG00000171960 | PPIH       | Peptidylprolyl isomerase H                                         | 0.021378 |
| ENSG00000116350 | SRSF4      | Serine and arginine rich splicing factor 4                         | 0.021864 |
| ENSG00000110958 | PTGES3     | Prostaglandin E synthase 3                                         | 0.021904 |
| ENSG00000121775 | TMEM39B    | Transmembrane protein 39B                                          | 0.021924 |
| ENSG00000169710 | FASN       | Fatty acid synthase                                                | 0.022366 |
| ENSG00000204899 | MZT1       | Mitotic spindle organizing protein 1                               | 0.022521 |
| ENSG00000008838 | MED24      | Mediator complex subunit 24                                        | 0.022521 |
| ENSG00000180385 | EMC3-AS1   | EMC3 antisense RNA 1                                               | 0.022533 |
| ENSG00000116161 | CACYBP     | Calcyclin binding protein                                          | 0.022743 |
| ENSG00000130881 | LRP3       | LDL receptor related protein 3                                     | 0.022743 |
| ENSG00000171097 | KYAT1      | Kynurenine aminotransferase 1                                      | 0.023335 |
| ENSG00000275895 | U2AF1L5    | U2 small nuclear RNA auxiliary factor 1 like 5                     | 0.023804 |
| ENSG00000183684 | ALYREF     | Aly/REF export factor                                              | 0.023953 |
| ENSG00000130520 | LSM4       | LSM4 homolog, U6 small nuclear RNA and mrna degradation associated | 0.024258 |
| ENSG00000198700 | IPO9       | Importin 9                                                         | 0.025198 |



|                 |            |                                                                                                      |          |
|-----------------|------------|------------------------------------------------------------------------------------------------------|----------|
| ENSG0000006625  | GGCT       | Gamma-glutamylcyclotransferase                                                                       | 0.025742 |
| ENSG00000175643 | RMI2       | Recq mediated genome instability 2                                                                   | 0.025825 |
| ENSG00000167306 | MYO5B      | Myosin VB                                                                                            | 0.025836 |
| ENSG00000254726 | MEX3A      | Mex-3 RNA binding family member A                                                                    | 0.025836 |
| ENSG00000205659 | LIN52      | Lin-52 DREAM muvb core complex component                                                             | 0.026108 |
| ENSG00000078900 | TP73       | Tumor protein p73                                                                                    | 0.026449 |
| ENSG00000188312 | CENPP      | Centromere protein P                                                                                 | 0.026939 |
| ENSG00000074696 | HACD3      | 3-hydroxyacyl-coa dehydratase 3                                                                      | 0.027313 |
| ENSG00000172336 | POP7       | POP7 homolog, ribonuclease P/MRP subunit                                                             | 0.02736  |
| ENSG00000128578 | STRIP2     | Striatin interacting protein 2                                                                       | 0.027816 |
| ENSG00000170989 | S1PR1      | Sphingosine-1-phosphate receptor 1                                                                   | 0.02853  |
| ENSG00000075461 | CACNG4     | Calcium voltage-gated channel auxiliary subunit gamma 4                                              | 0.028547 |
| ENSG00000197977 | ELOVL2     | ELOVL fatty acid elongase 2                                                                          | 0.028879 |
| ENSG00000103495 | MAZ        | MYC associated zinc finger protein                                                                   | 0.028879 |
| ENSG00000189159 | JPT1       | Jupiter microtubule associated homolog 1                                                             | 0.028893 |
| ENSG00000256663 | AC112777.1 | Ubiquitin-like with PHD and ring finger domains 1 (UHRF1) pseudogene                                 | 0.029783 |
| ENSG00000069974 | RAB27A     | RAB27A, member RAS oncogene family                                                                   | 0.029807 |
| ENSG00000112658 | SRF        | Serum response factor                                                                                | 0.030132 |
| ENSG00000094916 | CBX5       | Chromobox 5                                                                                          | 0.03022  |
| ENSG00000198168 | SVIP       | Small VCP interacting protein                                                                        | 0.030297 |
| ENSG00000127337 | YEATS4     | YEATS domain containing 4                                                                            | 0.030373 |
| ENSG00000181588 | MEX3D      | Mex-3 RNA binding family member D                                                                    | 0.030405 |
| ENSG00000122779 | TRIM24     | Tripartite motif containing 24                                                                       | 0.030405 |
| ENSG00000137656 | BUD13      | BUD13 homolog                                                                                        | 0.030405 |
| ENSG00000119397 | CNTRL      | Centriolin                                                                                           | 0.030478 |
| ENSG00000147955 | SIGMAR1    | Sigma non-opioid intracellular receptor 1                                                            | 0.030847 |
| ENSG00000128708 | HAT1       | Histone acetyltransferase 1                                                                          | 0.031237 |
| ENSG00000162613 | FUBP1      | Far upstream element binding protein 1                                                               | 0.031577 |
| ENSG00000177917 | ARL6IP6    | ADP ribosylation factor like gtpase 6 interacting protein 6                                          | 0.031885 |
| ENSG00000130826 | DKC1       | Dyskerin pseudouridine synthase 1                                                                    | 0.031885 |
| ENSG00000155755 | TMEM237    | Transmembrane protein 237                                                                            | 0.031929 |
| ENSG00000169689 | CENPX      | Centromere protein X                                                                                 | 0.032383 |
| ENSG00000066044 | ELAVL1     | ELAV like RNA binding protein 1                                                                      | 0.032383 |
| ENSG00000139998 | RAB15      | RAB15, member RAS oncogene family                                                                    | 0.032659 |
| ENSG00000183386 | FHL3       | Four and a half LIM domains 3                                                                        | 0.034072 |
| ENSG00000229676 | ZNF492     | Zinc finger protein 492                                                                              | 0.034179 |
| ENSG00000128050 | PAICS      | Phosphoribosylaminoimidazole carboxylase and phosphoribosylaminoimidazolesuccinocarboxamide synthase | 0.034399 |
| ENSG00000130935 | NOL11      | Nucleolar protein 11                                                                                 | 0.034588 |
| ENSG00000130208 | APOC1      | Apolipoprotein C1                                                                                    | 0.035042 |
| ENSG00000130726 | TRIM28     | Tripartite motif containing 28                                                                       | 0.035584 |
| ENSG00000106268 | NUDT1      | Nudix hydrolase 1                                                                                    | 0.035611 |
| ENSG00000164754 | RAD21      | RAD21 cohesin complex component                                                                      | 0.035736 |
| ENSG00000124160 | NCOA5      | Nuclear receptor coactivator 5                                                                       | 0.036026 |
| ENSG00000117676 | RPS6KA1    | Ribosomal protein S6 kinase A1                                                                       | 0.037086 |
| ENSG00000051825 | MPHOSPH9   | M-phase phosphoprotein 9                                                                             | 0.037086 |
| ENSG00000135052 | GOLM1      | Golgi membrane protein 1                                                                             | 0.037261 |
| ENSG00000137124 | ALDH1B1    | Aldehyde dehydrogenase 1 family member B1                                                            | 0.037274 |

|                 |            |                                                        |          |
|-----------------|------------|--------------------------------------------------------|----------|
| ENSG00000103966 | EHD4       | EH domain containing 4                                 | 0.037302 |
| ENSG00000090273 | NUDC       | Nuclear distribution C, dynein complex regulator       | 0.038214 |
| ENSG00000149782 | PLCB3      | Phospholipase C beta 3                                 | 0.038218 |
| ENSG00000188566 | NDOR1      | NADPH dependent diflavin oxidoreductase 1              | 0.039752 |
| ENSG00000178531 | CTXN1      | Cortexin 1                                             | 0.040737 |
| ENSG00000120699 | EXOSC8     | Exosome component 8                                    | 0.041059 |
| ENSG00000165527 | ARF6       | ADP ribosylation factor 6                              | 0.041662 |
| ENSG00000256229 | ZNF486     | Zinc finger protein 486                                | 0.042014 |
| ENSG00000104885 | DOT1L      | DOT1 like histone lysine methyltransferase             | 0.042079 |
| ENSG00000180979 | LRRC57     | Leucine rich repeat containing 57                      | 0.042184 |
| ENSG00000130669 | PAK4       | P21 (RAC1) activated kinase 4                          | 0.042878 |
| ENSG00000205531 | NAP1L4     | Nucleosome assembly protein 1 like 4                   | 0.04297  |
| ENSG00000177733 | HNRNPA0    | Heterogeneous nuclear ribonucleoprotein A0             | 0.04367  |
| ENSG00000092036 | HAUS4      | HAUS augmin like complex subunit 4                     | 0.043836 |
| ENSG00000078246 | TULP3      | TUB like protein 3                                     | 0.044114 |
| ENSG00000132661 | NXT1       | Nuclear transport factor 2 like export factor 1        | 0.045091 |
| ENSG00000070950 | RAD18      | RAD18 E3 ubiquitin protein ligase                      | 0.045478 |
| ENSG00000116062 | MSH6       | Muts homolog 6                                         | 0.045478 |
| ENSG00000127191 | TRAF2      | TNF receptor associated factor 2                       | 0.045478 |
| ENSG00000162066 | AMDHD2     | Amidohydrolase domain containing 2                     | 0.045478 |
| ENSG00000105202 | FBL        | Fibrillarin                                            | 0.045478 |
| ENSG00000167173 | C15orf39   | Chromosome 15 open reading frame 39                    | 0.045478 |
| ENSG00000257921 | AC025165.3 | Novel protein                                          | 0.045983 |
| ENSG00000050820 | BCAR1      | BCAR1 scaffold protein, Cas family member              | 0.046295 |
| ENSG00000102034 | ELF4       | E74 like ETS transcription factor 4                    | 0.046427 |
| ENSG00000172731 | LRRC20     | Leucine rich repeat containing 20                      | 0.04662  |
| ENSG00000143493 | INTS7      | Integrator complex subunit 7                           | 0.046652 |
| ENSG00000152284 | TCF7L1     | Transcription factor 7 like 1                          | 0.046684 |
| ENSG00000267060 | PTGES3L    | Prostaglandin E synthase 3 like                        | 0.046763 |
| ENSG00000002822 | MAD1L1     | Mitotic arrest deficient 1 like 1                      | 0.047023 |
| ENSG00000167699 | GLOD4      | Glyoxalase domain containing 4                         | 0.047357 |
| ENSG00000140682 | TGFB11     | Transforming growth factor beta 1 induced transcript 1 | 0.047357 |
| ENSG00000171791 | BCL2       | BCL2 apoptosis regulator                               | 0.047694 |
| ENSG00000172244 | C5orf34    | Chromosome 5 open reading frame 34                     | 0.047741 |
| ENSG00000084710 | EFR3B      | EFR3 homolog B                                         | 0.047741 |
| ENSG00000178202 | POGLUT3    | Protein O-glucosyltransferase 3                        | 0.047763 |
| ENSG00000137834 | SMAD6      | SMAD family member 6                                   | 0.048255 |
| ENSG00000156787 | TBC1D31    | TBC1 domain family member 31                           | 0.04935  |

**Supplementary Table S3.** Statistically significant DEGs (Adj,*p*-value<0.05) derived from DGEA of RNA-Seq data from Human Lens Epithelial Cells after X-ray irradiation, using DESeq2. The experiment consists of 5 control samples and 5 irradiated with 5 Gy X-ray radiation for 20 hours [Bioproject: PRJNA494581].

| Ensembl ID                  | Gene Symbol | Gene Description                                                     | Adj. <i>p</i> -Value |
|-----------------------------|-------------|----------------------------------------------------------------------|----------------------|
| <b>Up-Regulated Genes ↑</b> |             |                                                                      |                      |
| ENSG00000124762             | CDKN1A      | Cyclin dependent kinase inhibitor 1A                                 | 3.70E-39             |
| ENSG00000109321             | AREG        | Amphiregulin                                                         | 1.75E-27             |
| ENSG00000164938             | TP53INP1    | Tumor protein p53 inducible nuclear protein 1                        | 5.09E-24             |
| ENSG00000130513             | GDF15       | Growth differentiation factor 15                                     | 7.44E-16             |
| ENSG00000076382             | SPAG5       | Sperm associated antigen 5                                           | 1.34E-15             |
| ENSG00000256664             | AC025423.2  | Ribosomal L24 domain containing 1 (RSL24D1) pseudogene               | 1.35E-14             |
| ENSG00000175063             | UBE2C       | Ubiquitin conjugating enzyme E2 C                                    | 1.24E-13             |
| ENSG00000090889             | KIF4A       | Kinesin family member 4A                                             | 2.64E-13             |
| ENSG00000132563             | REEP2       | Receptor accessory protein 2                                         | 3.57E-13             |
| ENSG00000176244             | ACBD7       | Acyl-coa binding domain containing 7                                 | 1.92E-12             |
| ENSG00000119397             | CNTRL       | Centriolin                                                           | 2.15E-12             |
| ENSG00000157456             | CCNB2       | Cyclin B2                                                            | 2.34E-12             |
| ENSG00000143217             | NECTIN4     | Nectin cell adhesion molecule 4                                      | 3.08E-12             |
| ENSG00000177459             | ERICH5      | Glutamate rich 5                                                     | 5.58E-12             |
| ENSG00000135679             | MDM2        | MDM2 proto-oncogene                                                  | 8.64E-12             |
| ENSG00000135423             | GLS2        | Glutaminase 2                                                        | 1.49E-11             |
| ENSG00000120889             | TNFRSF10B   | TNF receptor superfamily member 10b                                  | 3.97E-11             |
| ENSG00000087586             | AURKA       | Aurora kinase A                                                      | 1.58E-10             |
| ENSG00000162490             | DRAXIN      | Dorsal inhibitory axon guidance protein                              | 1.69E-10             |
| ENSG00000100526             | CDKN3       | Cyclin dependent kinase inhibitor 3                                  | 1.03E-09             |
| ENSG00000159388             | BTG2        | BTG anti-proliferation factor 2                                      | 1.47E-09             |
| ENSG00000123933             | MXD4        | MAX dimerization protein 4                                           | 6.31E-09             |
| ENSG00000167107             | ACSF2       | Acyl-coa synthetase family member 2                                  | 7.26E-09             |
| ENSG00000117724             | CENPF       | Centromere protein F                                                 | 8.50E-09             |
| ENSG00000112984             | KIF20A      | Kinesin family member 20A                                            | 1.18E-08             |
| ENSG00000185361             | TNFAIP8L1   | TNF alpha induced protein 8 like 1                                   | 3.11E-08             |
| ENSG00000115163             | CENPA       | Centromere protein A                                                 | 4.32E-08             |
| ENSG00000066279             | ASPM        | Abnormal spindle microtubule assembly                                | 5.00E-08             |
| ENSG00000166592             | RRAD        | RRAD, Ras related glycolysis inhibitor and calcium channel regulator | 5.37E-08             |
| ENSG00000198919             | DZIP3       | DAZ interacting zinc finger protein 3                                | 5.98E-08             |
| ENSG00000170540             | ARL6IP1     | ADP ribosylation factor like gtpase 6 interacting protein 1          | 1.03E-07             |
| ENSG00000104870             | FCGRT       | Fc fragment of igg receptor and transporter                          | 1.08E-07             |
| ENSG00000068745             | IP6K2       | Inositol hexakisphosphate kinase 2                                   | 1.14E-07             |
| ENSG00000161513             | FDXR        | Ferredoxin reductase                                                 | 1.72E-07             |
| ENSG00000139354             | GAS2L3      | Growth arrest specific 2 like 3                                      | 2.20E-07             |
| ENSG00000153208             | MERTK       | MER proto-oncogene, tyrosine kinase                                  | 4.61E-07             |
| ENSG00000142945             | KIF2C       | Kinesin family member 2C                                             | 4.85E-07             |
| ENSG00000214357             | NEURL1B     | Neuralized E3 ubiquitin protein ligase 1B                            | 8.49E-07             |
| ENSG00000177076             | ACER2       | Alkaline ceramidase 2                                                | 1.07E-06             |
| ENSG00000010030             | ETV7        | ETS variant transcription factor 7                                   | 2.33E-06             |
| ENSG00000239713             | APOBEC3G    | Apolipoprotein B mrna editing enzyme catalytic subunit 3G            | 2.89E-06             |
| ENSG00000118193             | KIF14       | Kinesin family member 14                                             | 3.00E-06             |

|                 |         |                                                          |          |
|-----------------|---------|----------------------------------------------------------|----------|
| ENSG00000111665 | CDCA3   | Cell division cycle associated 3                         | 3.45E-06 |
| ENSG00000127483 | HP1BP3  | Heterochromatin protein 1 binding protein 3              | 3.72E-06 |
| ENSG00000021826 | CPS1    | Carbamoyl-phosphate synthase 1                           | 3.86E-06 |
| ENSG00000168918 | INPP5D  | Inositol polyphosphate-5-phosphatase D                   | 4.12E-06 |
| ENSG00000055163 | CYFIP2  | Cytoplasmic FMR1 interacting protein 2                   | 4.56E-06 |
| ENSG00000138271 | GPR87   | G protein-coupled receptor 87                            | 4.69E-06 |
| ENSG00000026103 | FAS     | Fas cell surface death receptor                          | 6.14E-06 |
| ENSG00000276180 | H4C9    | H4 clustered histone 9                                   | 7.10E-06 |
| ENSG00000164463 | CREBRF  | CREB3 regulatory factor                                  | 7.20E-06 |
| ENSG00000158402 | CDC25C  | Cell division cycle 25C                                  | 8.12E-06 |
| ENSG00000137975 | CLCA2   | Chloride channel accessory 2                             | 9.39E-06 |
| ENSG00000154040 | CABYR   | Calcium binding tyrosine phosphorylation regulated       | 1.17E-05 |
| ENSG00000169760 | NLGN1   | Neuroigin 1                                              | 1.33E-05 |
| ENSG00000153029 | MR1     | Major histocompatibility complex, class I-related        | 1.33E-05 |
| ENSG00000072571 | HMMR    | Hyaluronan mediated motility receptor                    | 1.67E-05 |
| ENSG00000117461 | PIK3R3  | Phosphoinositide-3-kinase regulatory subunit 3           | 1.68E-05 |
| ENSG00000131747 | TOP2A   | DNA topoisomerase II alpha                               | 1.78E-05 |
| ENSG00000075218 | GTSE1   | G2 and S-phase expressed 1                               | 1.93E-05 |
| ENSG00000133101 | CCNA1   | Cyclin A1                                                | 2.12E-05 |
| ENSG00000173156 | RHOD    | Ras homolog family member D                              | 2.83E-05 |
| ENSG00000105650 | PDE4C   | Phosphodiesterase 4C                                     | 3.37E-05 |
| ENSG00000132824 | SERINC3 | Serine incorporator 3                                    | 4.40E-05 |
| ENSG00000196814 | MVB12B  | Multivesicular body subunit 12B                          | 5.87E-05 |
| ENSG00000047346 | FAM214A | Family with sequence similarity 214 member A             | 6.26E-05 |
| ENSG00000139291 | TMEM19  | Transmembrane protein 19                                 | 8.39E-05 |
| ENSG00000189195 | BTBD8   | BTB domain containing 8                                  | 0.000107 |
| ENSG00000129195 | PIMREG  | PICALM interacting mitotic regulator                     | 0.000127 |
| ENSG00000073331 | ALPK1   | Alpha kinase 1                                           | 0.000133 |
| ENSG00000063854 | HAGH    | Hydroxyacylglutathione hydrolase                         | 0.000149 |
| ENSG00000164611 | PTTG1   | PTTG1 regulator of sister chromatid separation, securin  | 0.000192 |
| ENSG00000117650 | NEK2    | NIMA related kinase 2                                    | 0.000198 |
| ENSG00000161896 | IP6K3   | Inositol hexakisphosphate kinase 3                       | 0.000204 |
| ENSG00000137414 | FAM8A1  | Family with sequence similarity 8 member A1              | 0.000216 |
| ENSG00000166313 | APBB1   | Amyloid beta precursor protein binding family B member 1 | 0.000227 |
| ENSG00000233369 | GTF2IP4 | General transcription factor iii pseudogene 4            | 0.00023  |
| ENSG00000198909 | MAP3K3  | Mitogen-activated protein kinase kinase kinase 3         | 0.000241 |
| ENSG00000173230 | GOLGB1  | Golgin B1                                                | 0.000243 |
| ENSG00000148660 | CAMK2G  | Calcium/calmodulin dependent protein kinase II gamma     | 0.000244 |
| ENSG00000175938 | ORAI3   | ORAI calcium release-activated calcium modulator 3       | 0.000264 |
| ENSG00000105325 | FZR1    | Fizzy and cell division cycle 20 related 1               | 0.000299 |
| ENSG00000130517 | PGPEP1  | Pyroglutamyl-peptidase I                                 | 0.000335 |
| ENSG00000128944 | KNSTRN  | Kinetochore localized astrin (SPAG5) binding protein     | 0.00034  |
| ENSG00000178401 | DNAJC22 | Dnaj heat shock protein family (Hsp40) member C22        | 0.000362 |
| ENSG00000144452 | ABCA12  | ATP binding cassette subfamily A member 12               | 0.000394 |
| ENSG00000179163 | FUCA1   | Alpha-L-fucosidase 1                                     | 0.000403 |
| ENSG00000024526 | DEPDC1  | DEP domain containing 1                                  | 0.000498 |
| ENSG00000175793 | SFN     | Stratifin                                                | 0.000587 |
| ENSG00000158055 | GRHL3   | Grainyhead like transcription factor 3                   | 0.000589 |
| ENSG00000197892 | KIF13B  | Kinesin family member 13B                                | 0.000602 |
| ENSG00000108830 | RND2    | Rho family gtpase 2                                      | 0.000646 |

|                 |            |                                                             |          |
|-----------------|------------|-------------------------------------------------------------|----------|
| ENSG00000139508 | SLC46A3    | Solute carrier family 46 member 3                           | 0.000674 |
| ENSG00000092140 | G2E3       | G2/M-phase specific E3 ubiquitin protein ligase             | 0.000686 |
| ENSG00000136859 | ANGPTL2    | Angiopoietin like 2                                         | 0.000698 |
| ENSG00000157150 | TIMP4      | TIMP metalloproteinase inhibitor 4                          | 0.000706 |
| ENSG00000151117 | TMEM86A    | Transmembrane protein 86A                                   | 0.000728 |
| ENSG00000126709 | IFI6       | Interferon alpha inducible protein 6                        | 0.000759 |
| ENSG00000160539 | PLPP7      | Phospholipid phosphatase 7 (inactive)                       | 0.000832 |
| ENSG00000163346 | PBXIP1     | PBX homeobox interacting protein 1                          | 0.000946 |
| ENSG00000119630 | PGF        | Placental growth factor                                     | 0.001018 |
| ENSG00000197496 | SLC2A10    | Solute carrier family 2 member 10                           | 0.00119  |
| ENSG00000163683 | SMIM14     | Small integral membrane protein 14                          | 0.001282 |
| ENSG00000136108 | CKAP2      | Cytoskeleton associated protein 2                           | 0.001294 |
| ENSG00000105483 | CARD8      | Caspase recruitment domain family member 8                  | 0.001435 |
| ENSG00000174684 | B4GAT1     | Beta-1,4-glucuronyltransferase 1                            | 0.001489 |
| ENSG00000132793 | LPIN3      | Lipin 3                                                     | 0.001489 |
| ENSG00000188921 | HACD4      | 3-hydroxyacyl-coa dehydratase 4                             | 0.001678 |
| ENSG00000166233 | ARIH1      | Ariadne RBR E3 ubiquitin protein ligase 1                   | 0.00175  |
| ENSG00000182481 | KPNA2      | Karyopherin subunit alpha 2                                 | 0.00175  |
| ENSG00000011243 | AKAP8L     | A-kinase anchoring protein 8 like                           | 0.001787 |
| ENSG00000119139 | TJP2       | Tight junction protein 2                                    | 0.001898 |
| ENSG00000175216 | CKAP5      | Cytoskeleton associated protein 5                           | 0.001912 |
| ENSG00000160469 | BRSK1      | BR serine/threonine kinase 1                                | 0.001928 |
| ENSG00000001461 | NIPAL3     | NIPA like domain containing 3                               | 0.001944 |
| ENSG00000184661 | CDCA2      | Cell division cycle associated 2                            | 0.002024 |
| ENSG00000116299 | KIAA1324   | Kiaa1324                                                    | 0.002318 |
| ENSG00000163596 | ICA1L      | Islet cell autoantigen 1 like                               | 0.002417 |
| ENSG00000089041 | P2RX7      | Purinergic receptor P2X 7                                   | 0.002478 |
| ENSG00000131015 | ULBP2      | UL16 binding protein 2                                      | 0.002618 |
| ENSG00000185215 | TNFAIP2    | TNF alpha induced protein 2                                 | 0.002838 |
| ENSG00000096872 | IFT74      | Intraflagellar transport 74                                 | 0.00284  |
| ENSG00000166311 | SMPD1      | Sphingomyelin phosphodiesterase 1                           | 0.002855 |
| ENSG00000105443 | CYTH2      | Cytohesin 2                                                 | 0.002957 |
| ENSG00000161618 | ALDH16A1   | Aldehyde dehydrogenase 16 family member A1                  | 0.003124 |
| ENSG00000138606 | SHF        | Src homology 2 domain containing F                          | 0.003198 |
| ENSG00000136378 | ADAMTS7    | ADAM metalloproteinase with thrombospondin type 1 motif 7   | 0.003198 |
| ENSG00000108187 | PBLD       | Phenazine biosynthesis like protein domain containing       | 0.003218 |
| ENSG00000142459 | EVI5L      | Ecotropic viral integration site 5 like                     | 0.003222 |
| ENSG00000188002 | AC026412.1 | Programmed cell death 6 (PDCD6) pseudogene                  | 0.003222 |
| ENSG00000213463 | SYNJ2BP    | Synaptojanin 2 binding protein                              | 0.003299 |
| ENSG00000118898 | PPL        | Periplakin                                                  | 0.0033   |
| ENSG00000156973 | PDE6D      | Phosphodiesterase 6D                                        | 0.003349 |
| ENSG00000241839 | PLEKHO2    | Pleckstrin homology domain containing O2                    | 0.003407 |
| ENSG00000204219 | TCEA3      | Transcription elongation factor A3                          | 0.003501 |
| ENSG00000120693 | SMAD9      | SMAD family member 9                                        | 0.003514 |
| ENSG00000143390 | RFX5       | Regulatory factor X5                                        | 0.003522 |
| ENSG00000176438 | SYNE3      | Spectrin repeat containing nuclear envelope family member 3 | 0.003522 |
| ENSG00000179277 | MEIS3P1    | Meis homeobox 3 pseudogene 1                                | 0.00357  |
| ENSG00000244694 | PTCHD4     | Patched domain containing 4                                 | 0.003593 |
| ENSG00000035499 | DEPDC1B    | DEP domain containing 1B                                    | 0.003685 |

|                 |            |                                                                        |          |
|-----------------|------------|------------------------------------------------------------------------|----------|
| ENSG00000168874 | ATOH8      | Atonal bhlh transcription factor 8                                     | 0.003702 |
| ENSG00000149809 | TM7SF2     | Transmembrane 7 superfamily member 2                                   | 0.003729 |
| ENSG00000169679 | BUB1       | BUB1 mitotic checkpoint serine/threonine kinase                        | 0.003775 |
| ENSG00000117399 | CDC20      | Cell division cycle 20                                                 | 0.003917 |
| ENSG00000175893 | ZDHHC21    | Zinc finger DHHC-type containing 21                                    | 0.003964 |
| ENSG00000104177 | MYEF2      | Myelin expression factor 2                                             | 0.004088 |
| ENSG00000237094 | AL732372.2 | Pseudogene similar to part of septin 14 SEPT14                         | 0.004106 |
| ENSG00000132623 | ANKEF1     | Ankyrin repeat and EF-hand domain containing 1                         | 0.004148 |
| ENSG00000130703 | OSBPL2     | Oxysterol binding protein like 2                                       | 0.004328 |
| ENSG00000133460 | SLC2A11    | Solute carrier family 2 member 11                                      | 0.004328 |
| ENSG00000196187 | TMEM63A    | Transmembrane protein 63A                                              | 0.004328 |
| ENSG00000167861 | HID1       | HID1 domain containing                                                 | 0.004328 |
| ENSG00000142619 | PADI3      | Peptidyl arginine deiminase 3                                          | 0.004328 |
| ENSG00000231007 | CDC20P1    | Cell division cycle 20 pseudogene 1                                    | 0.004468 |
| ENSG00000185432 | METTL7A    | Methyltransferase like 7A                                              | 0.004498 |
| ENSG00000139112 | GABARAPL1  | GABA type A receptor associated protein like 1                         | 0.004541 |
| ENSG00000165861 | ZFYVE1     | Zinc finger FYVE-type containing 1                                     | 0.004612 |
| ENSG00000102981 | PAR6A      | Par-6 family cell polarity regulator alpha                             | 0.004721 |
| ENSG00000196550 | FAM72A     | Family with sequence similarity 72 member A                            | 0.004743 |
| ENSG00000034713 | GABARAPL2  | GABA type A receptor associated protein like 2                         | 0.004771 |
| ENSG00000076685 | NT5C2      | 5'-nucleotidase, cytosolic II                                          | 0.004943 |
| ENSG00000197429 | IPP        | Intracisternal A particle-promoted polypeptide                         | 0.00519  |
| ENSG00000184602 | SNN        | Stannin                                                                | 0.005326 |
| ENSG00000114107 | CEP70      | Centrosomal protein 70                                                 | 0.005499 |
| ENSG00000165219 | GAPVD1     | Gtpase activating protein and VPS9 domains 1                           | 0.005565 |
| ENSG00000188554 | NBR1       | NBR1 autophagy cargo receptor                                          | 0.005581 |
| ENSG00000119403 | PHF19      | PHD finger protein 19                                                  | 0.005763 |
| ENSG00000064199 | SPA17      | Sperm autoantigenic protein 17                                         | 0.006228 |
| ENSG00000139597 | N4BP2L1    | NEDD4 binding protein 2 like 1                                         | 0.006267 |
| ENSG00000164088 | PPM1M      | Protein phosphatase, Mg <sup>2+</sup> /Mn <sup>2+</sup> dependent 1M   | 0.006334 |
| ENSG00000132849 | PATJ       | PATJ crumbs cell polarity complex component                            | 0.006337 |
| ENSG00000156671 | SAMD8      | Sterile alpha motif domain containing 8                                | 0.006347 |
| ENSG00000138495 | COX17      | Cytochrome c oxidase copper chaperone COX17                            | 0.00656  |
| ENSG00000169621 | APLF       | Aprataxin and PNKP like factor                                         | 0.00661  |
| ENSG00000135452 | TSPAN31    | Tetraspanin 31                                                         | 0.00664  |
| ENSG00000135451 | TROAP      | Trophinin associated protein                                           | 0.00664  |
| ENSG00000085998 | POMGNT1    | Protein O-linked mannose N-acetylglucosaminyltransferase 1 (beta 1,2-) | 0.006658 |
| ENSG00000080986 | NDC80      | NDC80 kinetochore complex component                                    | 0.006658 |
| ENSG00000126787 | DLGAP5     | DLG associated protein 5                                               | 0.006732 |
| ENSG00000185339 | TCN2       | Transcobalamin 2                                                       | 0.006737 |
| ENSG00000112983 | BRD8       | Bromodomain containing 8                                               | 0.006845 |
| ENSG00000103485 | QPRT       | Quinolate phosphoribosyltransferase                                    | 0.00685  |
| ENSG00000125746 | EML2       | EMAP like 2                                                            | 0.00685  |
| ENSG00000169902 | TPST1      | Tyrosylprotein sulfotransferase 1                                      | 0.007033 |
| ENSG00000158467 | AHCYL2     | Adenosylhomocysteinase like 2                                          | 0.0073   |
| ENSG00000101447 | FAM83D     | Family with sequence similarity 83 member D                            | 0.007334 |
| ENSG00000141504 | SAT2       | Spermidine/spermine N1-acetyltransferase family member 2               | 0.007526 |
| ENSG00000149212 | SESN3      | Sestrin 3                                                              | 0.007815 |
| ENSG00000138798 | EGF        | Epidermal growth factor                                                | 0.007859 |

|                 |          |                                                                        |          |
|-----------------|----------|------------------------------------------------------------------------|----------|
| ENSG00000127914 | AKAP9    | A-kinase anchoring protein 9                                           | 0.007878 |
| ENSG00000132570 | PCBD2    | Pterin-4 alpha-carbinolamine dehydratase 2                             | 0.007986 |
| ENSG00000168734 | PKIG     | Camp-dependent protein kinase inhibitor gamma                          | 0.008273 |
| ENSG00000158457 | TSPAN33  | Tetraspanin 33                                                         | 0.008298 |
| ENSG00000064687 | ABCA7    | ATP binding cassette subfamily A member 7                              | 0.008324 |
| ENSG00000111269 | CREBL2   | Camp responsive element binding protein like 2                         | 0.008329 |
| ENSG00000146232 | NFKBIE   | NFKB inhibitor epsilon                                                 | 0.008329 |
| ENSG00000161835 | GRASP    | General receptor for phosphoinositides 1 associated scaffold protein   | 0.008421 |
| ENSG00000163449 | TMEM169  | Transmembrane protein 169                                              | 0.008489 |
| ENSG00000158106 | RHPN1    | Rhophilin Rho gtpase binding protein 1                                 | 0.008495 |
| ENSG00000188766 | SPRED3   | Sprouty related EVH1 domain containing 3                               | 0.008537 |
| ENSG00000174007 | CEP19    | Centrosomal protein 19                                                 | 0.008557 |
| ENSG00000105851 | PIK3CG   | Phosphatidylinositol-4,5-bisphosphate 3-kinase catalytic subunit gamma | 0.00866  |
| ENSG00000121310 | ECHDC2   | Enoyl-coa hydratase domain containing 2                                | 0.009255 |
| ENSG00000137880 | GCHFR    | GTP cyclohydrolase I feedback regulator                                | 0.009255 |
| ENSG00000154240 | CEP112   | Centrosomal protein 112                                                | 0.009681 |
| ENSG00000012822 | CALCOCO1 | Calcium binding and coiled-coil domain 1                               | 0.009774 |
| ENSG00000173064 | HECTD4   | HECT domain E3 ubiquitin protein ligase 4                              | 0.009934 |
| ENSG00000239382 | ALKBH6   | Alkb homolog 6                                                         | 0.010383 |
| ENSG00000181513 | ACBD4    | Acyl-coa binding domain containing 4                                   | 0.010426 |
| ENSG00000092758 | COL9A3   | Collagen type IX alpha 3 chain                                         | 0.010511 |
| ENSG00000155111 | CDK19    | Cyclin dependent kinase 19                                             | 0.010678 |
| ENSG00000110713 | NUP98    | Nucleoporin 98                                                         | 0.010749 |
| ENSG00000089685 | BIRC5    | Baculoviral IAP repeat containing 5                                    | 0.010906 |
| ENSG00000055732 | MCOLN3   | Mucolipin 3                                                            | 0.011107 |
| ENSG00000196502 | SULT1A1  | Sulfotransferase family 1A member 1                                    | 0.011272 |
| ENSG00000173214 | MFS4B    | Major facilitator superfamily domain containing 4B                     | 0.011392 |
| ENSG00000135119 | RNFT2    | Ring finger protein, transmembrane 2                                   | 0.011459 |
| ENSG00000169583 | CLIC3    | Chloride intracellular channel 3                                       | 0.011513 |
| ENSG00000144834 | TAGLN3   | Transgelin 3                                                           | 0.011947 |
| ENSG00000087884 | AAMDC    | Adipogenesis associated Mth938 domain containing                       | 0.011965 |
| ENSG00000056558 | TRAF1    | TNF receptor associated factor 1                                       | 0.012012 |
| ENSG00000178038 | ALS2CL   | ALS2 C-terminal like                                                   | 0.012283 |
| ENSG00000108106 | UBE2S    | Ubiquitin conjugating enzyme E2 S                                      | 0.012575 |
| ENSG00000137804 | NUSAP1   | Nucleolar and spindle associated protein 1                             | 0.012956 |
| ENSG00000181754 | AMIGO1   | Adhesion molecule with Ig like domain 1                                | 0.013273 |
| ENSG00000134057 | CCNB1    | Cyclin B1                                                              | 0.0133   |
| ENSG00000219481 | NBPF1    | NBPF member 1                                                          | 0.013365 |
| ENSG00000140386 | SCAPER   | S-phase cyclin A associated protein in the ER                          | 0.013486 |
| ENSG00000123609 | NMI      | N-myc and STAT interactor                                              | 0.013486 |
| ENSG00000120709 | FAM53C   | Family with sequence similarity 53 member C                            | 0.013752 |
| ENSG00000100401 | RANGAP1  | Ran gtpase activating protein 1                                        | 0.013752 |
| ENSG00000146411 | SLC2A12  | Solute carrier family 2 member 12                                      | 0.013844 |
| ENSG00000100290 | BIK      | BCL2 interacting killer                                                | 0.013844 |
| ENSG00000181045 | SLC26A11 | Solute carrier family 26 member 11                                     | 0.013926 |
| ENSG00000243749 | TMEM35B  | Transmembrane protein 35B                                              | 0.014452 |
| ENSG00000163535 | SGO2     | Shugoshin 2                                                            | 0.014452 |
| ENSG00000136874 | STX17    | Syntaxin 17                                                            | 0.014537 |
| ENSG00000141232 | TOB1     | Transducer of ERBB2, 1                                                 | 0.014837 |

|                 |            |                                                                  |          |
|-----------------|------------|------------------------------------------------------------------|----------|
| ENSG00000198331 | HYLS1      | HYLS1 centriolar and ciliogenesis associated                     | 0.015192 |
| ENSG00000160460 | AC020929.1 | Spectrin beta, non-erythrocytic 4                                | 0.015222 |
| ENSG00000157184 | CPT2       | Carnitine palmitoyltransferase 2                                 | 0.015481 |
| ENSG00000066926 | FECH       | Ferrochelatase                                                   | 0.0155   |
| ENSG00000134070 | IRAK2      | Interleukin 1 receptor associated kinase 2                       | 0.0155   |
| ENSG00000197302 | ZNF720     | Zinc finger protein 720                                          | 0.0155   |
| ENSG00000060656 | PTPRU      | Protein tyrosine phosphatase receptor type U                     | 0.0155   |
| ENSG00000065320 | NTN1       | Netrin 1                                                         | 0.0155   |
| ENSG00000067369 | TP53BP1    | Tumor protein p53 binding protein 1                              | 0.015728 |
| ENSG00000178184 | PARD6G     | Par-6 family cell polarity regulator gamma                       | 0.015736 |
| ENSG00000138653 | NDST4      | N-deacetylase and N-sulfotransferase 4                           | 0.015948 |
| ENSG00000170667 | RASA4B     | RAS p21 protein activator 4B                                     | 0.015948 |
| ENSG00000166145 | SPINT1     | Serine peptidase inhibitor, Kunitz type 1                        | 0.015996 |
| ENSG00000213918 | DNASE1     | Deoxyribonuclease 1                                              | 0.015998 |
| ENSG00000064961 | HMG20B     | High mobility group 20B                                          | 0.016158 |
| ENSG00000031003 | FAM13B     | Family with sequence similarity 13 member B                      | 0.016299 |
| ENSG00000112981 | NME5       | NME/NM23 family member 5                                         | 0.016486 |
| ENSG00000285827 | AP001267.5 | Novel protein                                                    | 0.017593 |
| ENSG00000128917 | DLL4       | Delta like canonical Notch ligand 4                              | 0.017956 |
| ENSG00000183763 | TRAIIP     | TRAF interacting protein                                         | 0.018133 |
| ENSG00000138182 | KIF20B     | Kinesin family member 20B                                        | 0.018192 |
| ENSG00000187688 | TRPV2      | Transient receptor potential cation channel subfamily V member 2 | 0.018419 |
| ENSG00000163701 | IL17RE     | Interleukin 17 receptor E                                        | 0.018529 |
| ENSG00000137207 | YIPF3      | Yip1 domain family member 3                                      | 0.018805 |
| ENSG00000165280 | VCP        | Valosin containing protein                                       | 0.019236 |
| ENSG00000138641 | HERC3      | HECT and RLD domain containing E3 ubiquitin protein ligase 3     | 0.019692 |
| ENSG00000111058 | ACSS3      | Acy-coa synthetase short chain family member 3                   | 0.019948 |
| ENSG00000175854 | SWI5       | SWI5 homologous recombination repair protein                     | 0.020255 |
| ENSG00000141380 | SS18       | SS18 subunit of BAF chromatin remodeling complex                 | 0.020397 |
| ENSG00000166816 | LDHD       | Lactate dehydrogenase D                                          | 0.020625 |
| ENSG00000175352 | NRIP3      | Nuclear receptor interacting protein 3                           | 0.020865 |
| ENSG00000156970 | BUB1B      | BUB1 mitotic checkpoint serine/threonine kinase B                | 0.020959 |
| ENSG00000027869 | SH2D2A     | SH2 domain containing 2A                                         | 0.020959 |
| ENSG00000165209 | STRBP      | Spermatid perinuclear RNA binding protein                        | 0.021159 |
| ENSG00000153237 | CCDC148    | Coiled-coil domain containing 148                                | 0.021195 |
| ENSG00000165113 | GKAP1      | G kinase anchoring protein 1                                     | 0.022053 |
| ENSG00000240771 | ARHGEF25   | Rho guanine nucleotide exchange factor 25                        | 0.022312 |
| ENSG00000161800 | RACGAP1    | Rac gtpase activating protein 1                                  | 0.022425 |
| ENSG00000132879 | FBXO44     | F-box protein 44                                                 | 0.022425 |
| ENSG00000171236 | LRG1       | Leucine rich alpha-2-glycoprotein 1                              | 0.022425 |
| ENSG00000171680 | PLEKHG5    | Pleckstrin homology and rhogef domain containing G5              | 0.022753 |
| ENSG00000141376 | BCAS3      | BCAS3 microtubule associated cell migration factor               | 0.023124 |
| ENSG00000166887 | VPS39      | VPS39 subunit of HOPS complex                                    | 0.023249 |
| ENSG00000115226 | FNDC4      | Fibronectin type III domain containing 4                         | 0.023754 |
| ENSG00000135506 | OS9        | OS9 endoplasmic reticulum lectin                                 | 0.024111 |
| ENSG00000043143 | JADE2      | Jade family PHD finger 2                                         | 0.024111 |
| ENSG00000163521 | GLB1L      | Galactosidase beta 1 like                                        | 0.024677 |
| ENSG00000104756 | KCTD9      | Potassium channel tetramerization domain containing 9            | 0.02474  |
| ENSG00000101298 | SNPH       | Syntaphilin                                                      | 0.02474  |



|                 |          |                                                                                                   |          |
|-----------------|----------|---------------------------------------------------------------------------------------------------|----------|
| ENSG00000185745 | IFIT1    | Interferon induced protein with tetratricopeptide repeats 1                                       | 0.024853 |
| ENSG00000112561 | TFEB     | Transcription factor EB                                                                           | 0.024856 |
| ENSG00000138166 | DUSP5    | Dual specificity phosphatase 5                                                                    | 0.024897 |
| ENSG00000122483 | CCDC18   | Coiled-coil domain containing 18                                                                  | 0.024897 |
| ENSG00000135828 | RNASEL   | Ribonuclease L                                                                                    | 0.024901 |
| ENSG00000175155 | YPEL2    | Yippee like 2                                                                                     | 0.024995 |
| ENSG00000129003 | VPS13C   | Vacuolar protein sorting 13 homolog C                                                             | 0.025037 |
| ENSG00000138036 | DYNC2LI1 | Dynein cytoplasmic 2 light intermediate chain 1                                                   | 0.02518  |
| ENSG00000174307 | PHLDA3   | Pleckstrin homology like domain family A member 3                                                 | 0.02518  |
| ENSG00000157954 | WIP1     | WD repeat domain, phosphoinositide interacting 2                                                  | 0.025197 |
| ENSG00000165475 | CRYL1    | Crystallin lambda 1                                                                               | 0.025231 |
| ENSG00000172738 | TMEM217  | Transmembrane protein 217                                                                         | 0.0253   |
| ENSG00000125347 | IRF1     | Interferon regulatory factor 1                                                                    | 0.025727 |
| ENSG00000128604 | IRF5     | Interferon regulatory factor 5                                                                    | 0.025768 |
| ENSG00000066084 | DIP2B    | Disco interacting protein 2 homolog B                                                             | 0.025984 |
| ENSG00000182134 | TDRKH    | Tudor and KH domain containing                                                                    | 0.025984 |
| ENSG00000273045 | C2orf15  | Chromosome 2 open reading frame 15                                                                | 0.026342 |
| ENSG00000159592 | GPBP1L1  | GC-rich promoter binding protein 1 like 1                                                         | 0.026379 |
| ENSG00000185669 | SNAI3    | Snail family transcriptional repressor 3                                                          | 0.026379 |
| ENSG00000171130 | ATP6V0E2 | ATPase H <sup>+</sup> transporting V0 subunit e2                                                  | 0.027007 |
| ENSG00000102038 | SMARCA1  | SWI/SNF related, matrix associated, actin dependent regulator of chromatin, subfamily a, member 1 | 0.027438 |
| ENSG00000211584 | SLC48A1  | Solute carrier family 48 member 1                                                                 | 0.028058 |
| ENSG00000078304 | PPP2R5C  | Protein phosphatase 2 regulatory subunit b'gamma                                                  | 0.028337 |
| ENSG00000189241 | TSPYL1   | TSPY like 1                                                                                       | 0.028611 |
| ENSG00000081377 | CDC14B   | Cell division cycle 14B                                                                           | 0.028971 |
| ENSG00000178078 | STAP2    | Signal transducing adaptor family member 2                                                        | 0.028971 |
| ENSG00000138160 | KIF11    | Kinesin family member 11                                                                          | 0.029221 |
| ENSG00000100577 | GSTZ1    | Glutathione S-transferase zeta 1                                                                  | 0.029284 |
| ENSG00000109654 | TRIM2    | Tripartite motif containing 2                                                                     | 0.029637 |
| ENSG00000172508 | CARNS1   | Carnosine synthase 1                                                                              | 0.03065  |
| ENSG00000283050 | GTF2IP12 | General transcription factor iii pseudogene 12                                                    | 0.031757 |
| ENSG00000054267 | ARID4B   | AT-rich interaction domain 4B                                                                     | 0.031907 |
| ENSG00000156042 | CFAP70   | Cilia and flagella associated protein 70                                                          | 0.032416 |
| ENSG00000198842 | DUSP27   | Dual specificity phosphatase 27, atypical                                                         | 0.032807 |
| ENSG00000188610 | FAM72B   | Family with sequence similarity 72 member B                                                       | 0.032955 |
| ENSG00000242294 | STAG3L5P | Stromal antigen 3-like 5 pseudogene                                                               | 0.033107 |
| ENSG00000186193 | SAPCD2   | Suppressor APC domain containing 2                                                                | 0.033107 |
| ENSG00000197056 | ZMYM1    | Zinc finger MYM-type containing 1                                                                 | 0.034281 |
| ENSG00000072954 | TMEM38A  | Transmembrane protein 38A                                                                         | 0.034347 |
| ENSG00000054219 | LY75     | Lymphocyte antigen 75                                                                             | 0.035345 |
| ENSG00000278023 | RDM1     | RAD52 motif containing 1                                                                          | 0.035475 |
| ENSG00000137807 | KIF23    | Kinesin family member 23                                                                          | 0.036362 |
| ENSG00000120733 | KDM3B    | Lysine demethylase 3B                                                                             | 0.036419 |
| ENSG00000173992 | CCS      | Copper chaperone for superoxide dismutase                                                         | 0.036822 |
| ENSG00000116793 | PHTF1    | Putative homeodomain transcription factor 1                                                       | 0.037191 |
| ENSG00000148950 | IMMP1L   | Inner mitochondrial membrane peptidase subunit 1                                                  | 0.037191 |
| ENSG00000176907 | TCIM     | Transcriptional and immune response regulator                                                     | 0.037191 |
| ENSG00000183682 | BMP8A    | Bone morphogenetic protein 8a                                                                     | 0.037551 |
| ENSG00000183624 | HMCES    | 5-hydroxymethylcytosine binding, ES cell specific                                                 | 0.037593 |

|                               |            |                                                                                 |          |
|-------------------------------|------------|---------------------------------------------------------------------------------|----------|
| ENSG00000105327               | BBC3       | BCL2 binding component 3                                                        | 0.037696 |
| ENSG00000174125               | TLR1       | Toll like receptor 1                                                            | 0.037722 |
| ENSG00000260300               |            |                                                                                 | 0.037731 |
| ENSG00000130477               | UNC13A     | Unc-13 homolog A                                                                | 0.037771 |
| ENSG00000172831               | CES2       | Carboxylesterase 2                                                              | 0.037908 |
| ENSG00000162643               | WDR63      | WD repeat domain 63                                                             | 0.038078 |
| ENSG00000140451               | PIF1       | PIF1 5'-to-3' DNA helicase                                                      | 0.038158 |
| ENSG00000205403               | CFI        | Complement factor I                                                             | 0.03888  |
| ENSG00000136158               | SPRY2      | Sprouty RTK signaling antagonist 2                                              | 0.038978 |
| ENSG00000123975               | CKS2       | CDC28 protein kinase regulatory subunit 2                                       | 0.039119 |
| ENSG00000112294               | ALDH5A1    | Aldehyde dehydrogenase 5 family member A1                                       | 0.040097 |
| ENSG00000170634               | ACYP2      | Acylphosphatase 2                                                               | 0.040295 |
| ENSG00000084764               | MAPRE3     | Microtubule associated protein RP/EB family member 3                            | 0.040436 |
| ENSG00000134202               | GSTM3      | Glutathione S-transferase mu 3                                                  | 0.040533 |
| ENSG00000141574               | SECTM1     | Secreted and transmembrane 1                                                    | 0.040735 |
| ENSG00000170734               | POLH       | DNA polymerase eta                                                              | 0.040897 |
| ENSG00000171812               | COL8A2     | Collagen type VIII alpha 2 chain                                                | 0.040897 |
| ENSG00000205089               | CCNI2      | Cyclin I family member 2                                                        | 0.040897 |
| ENSG00000150977               | RILPL2     | Rab interacting lysosomal protein like 2                                        | 0.041042 |
| ENSG00000170542               | SERPINB9   | Serpin family B member 9                                                        | 0.041584 |
| ENSG00000115129               | TP53I3     | Tumor protein p53 inducible protein 3                                           | 0.042293 |
| ENSG00000101347               | SAMHD1     | SAM and HD domain containing deoxynucleoside triphosphate triphosphohydrolase 1 | 0.042377 |
| ENSG00000100897               | DCAF11     | DDB1 and CUL4 associated factor 11                                              | 0.042607 |
| ENSG00000213186               | TRIM59     | Tripartite motif containing 59                                                  | 0.042807 |
| ENSG00000125744               | RTN2       | Reticulon 2                                                                     | 0.04398  |
| ENSG00000103490               | PYCARD     | PYD and CARD domain containing                                                  | 0.04398  |
| ENSG00000135525               | MAP7       | Microtubule associated protein 7                                                | 0.04406  |
| ENSG00000130363               | RSPH3      | Radial spoke head 3                                                             | 0.044069 |
| ENSG00000128394               | APOBEC3F   | Apolipoprotein B mRNA editing enzyme catalytic subunit 3F                       | 0.045478 |
| ENSG00000213930               | GALT       | Galactose-1-phosphate uridylyltransferase                                       | 0.046342 |
| ENSG00000231551               | AC245100.4 | Phosphodiesterase 4D interacting protein (PDE4DIP) pseudogene                   | 0.046342 |
| ENSG00000118292               | C1orf54    | Chromosome 1 open reading frame 54                                              | 0.04641  |
| ENSG00000136861               | CDK5RAP2   | CDK5 regulatory subunit associated protein 2                                    | 0.046519 |
| ENSG00000182511               | FES        | FES proto-oncogene, tyrosine kinase                                             | 0.046523 |
| ENSG00000197165               | SULT1A2    | Sulfotransferase family 1A member 2                                             | 0.04733  |
| ENSG00000006283               | CACNA1G    | Calcium voltage-gated channel subunit alpha1 G                                  | 0.047333 |
| ENSG00000236609               | ZNF853     | Zinc finger protein 853                                                         | 0.047432 |
| ENSG00000148057               | IDNK       | IDNK gluconokinase                                                              | 0.047852 |
| ENSG00000137135               | ARHGEF39   | Rho guanine nucleotide exchange factor 39                                       | 0.047866 |
| ENSG00000160014               | CALM3      | Calmodulin 3                                                                    | 0.047954 |
| ENSG00000108771               | DHX58      | Dexh-box helicase 58                                                            | 0.048092 |
| ENSG00000100027               | YPEL1      | Yippee like 1                                                                   | 0.048719 |
| ENSG00000173193               | PARP14     | Poly(ADP-ribose) polymerase family member 14                                    | 0.049401 |
| ENSG00000119508               | NR4A3      | Nuclear receptor subfamily 4 group A member 3                                   | 0.049457 |
| ENSG00000255150               | EID3       | EP300 interacting inhibitor of differentiation 3                                | 0.049717 |
| ENSG00000078487               | ZCWPW1     | Zinc finger CW-type and PWWP domain containing 1                                | 0.049821 |
| <b>Down-Regulated Genes ↓</b> |            |                                                                                 |          |
| ENSG00000107562               | CXCL12     | C-X-C motif chemokine ligand 12                                                 | 4.22E-27 |

|                 |            |                                              |          |
|-----------------|------------|----------------------------------------------|----------|
| ENSG00000168298 | H1-4       | H1.4 linker histone, cluster member          | 3.66E-25 |
| ENSG00000146674 | IGFBP3     | Insulin like growth factor binding protein 3 | 1.84E-24 |
| ENSG00000184357 | H1-5       | H1.5 linker histone, cluster member          | 1.35E-22 |
| ENSG00000277075 | H2AC8      | H2A clustered histone 8                      | 3.10E-22 |
| ENSG00000197153 | H3C12      | H3 clustered histone 12                      | 2.98E-20 |
| ENSG00000184260 | H2AC20     | H2A clustered histone 20                     | 1.11E-18 |
| ENSG00000184270 | H2AC21     | H2A clustered histone 21                     | 2.48E-18 |
| ENSG00000183688 | RFLNB      | Refilin B                                    | 6.46E-18 |
| ENSG00000276903 | H2AC16     | H2A clustered histone 16                     | 1.21E-17 |
| ENSG00000183598 | H3C13      | H3 clustered histone 13                      | 2.42E-17 |
| ENSG00000278463 | H2AC4      | H2A clustered histone 4                      | 3.72E-17 |
| ENSG00000187837 | H1-2       | H1.2 linker histone, cluster member          | 1.41E-16 |
| ENSG00000154678 | PDE1C      | Phosphodiesterase 1C                         | 7.97E-16 |
| ENSG00000092969 | TGFB2      | Transforming growth factor beta 2            | 1.00E-14 |
| ENSG00000127863 | TNFRSF19   | TNF receptor superfamily member 19           | 6.99E-14 |
| ENSG00000286522 | H3C2       | H3 clustered histone 2                       | 1.17E-13 |
| ENSG00000196747 | H2AC13     | H2A clustered histone 13                     | 1.86E-13 |
| ENSG00000124575 | H1-3       | H1.3 linker histone, cluster member          | 1.57E-12 |
| ENSG00000278677 | H2AC17     | H2A clustered histone 17                     | 1.92E-12 |
| ENSG00000273802 | H2BC8      | H2B clustered histone 8                      | 2.22E-12 |
| ENSG00000100504 | PYGL       | Glycogen phosphorylase L                     | 3.50E-12 |
| ENSG00000203814 | H2BC18     | H2B clustered histone 18                     | 8.56E-12 |
| ENSG00000274997 | H2AC12     | H2A clustered histone 12                     | 1.07E-11 |
| ENSG00000275379 | H3C11      | H3 clustered histone 11                      | 1.32E-11 |
| ENSG00000101938 | CHRD1      | Chordin like 1                               | 2.08E-11 |
| ENSG00000180596 | H2BC4      | H2B clustered histone 4                      | 2.73E-11 |
| ENSG00000164125 | GASK1B     | Golgi associated kinase 1B                   | 2.95E-11 |
| ENSG00000185130 | H2BC13     | H2B clustered histone 13                     | 5.61E-11 |
| ENSG00000277224 | H2BC7      | H2B clustered histone 7                      | 6.63E-11 |
| ENSG00000277157 | H4C4       | H4 clustered histone 4                       | 1.58E-10 |
| ENSG00000272196 | H2AC19     | H2A clustered histone 19                     | 2.65E-10 |
| ENSG00000145681 | HAPLN1     | Hyaluronan and proteoglycan link protein 1   | 4.93E-10 |
| ENSG00000196787 | H2AC11     | H2A clustered histone 11                     | 5.71E-10 |
| ENSG00000128422 | KRT17      | Keratin 17                                   | 5.71E-10 |
| ENSG00000162909 | CAPN2      | Calpain 2                                    | 5.71E-10 |
| ENSG00000282988 | AL031777.2 | Novel protein                                | 7.51E-10 |
| ENSG00000099194 | SCD        | Stearoyl-coa desaturase                      | 1.16E-09 |
| ENSG00000275714 | H3C1       | H3 clustered histone 1                       | 1.52E-09 |
| ENSG00000203811 | H3C14      | H3 clustered histone 14                      | 1.67E-09 |
| ENSG00000145604 | SKP2       | S-phase kinase associated protein 2          | 2.17E-09 |
| ENSG00000180730 | SHISA2     | Shisa family member 2                        | 2.93E-09 |
| ENSG00000197903 | H2BC12     | H2B clustered histone 12                     | 2.99E-09 |
| ENSG00000156466 | GDF6       | Growth differentiation factor 6              | 3.77E-09 |
| ENSG00000105974 | CAV1       | Caveolin 1                                   | 3.90E-09 |
| ENSG00000196866 | H2AC7      | H2A clustered histone 7                      | 3.97E-09 |
| ENSG00000044524 | EPHA3      | EPH receptor A3                              | 4.04E-09 |
| ENSG00000183287 | CCBE1      | Collagen and calcium binding EGF domains 1   | 4.37E-09 |
| ENSG00000072041 | SLC6A15    | Solute carrier family 6 member 15            | 5.21E-09 |
| ENSG00000124610 | H1-1       | H1.1 linker histone, cluster member          | 5.75E-09 |
| ENSG00000158373 | H2BC5      | H2B clustered histone 5                      | 7.51E-09 |
| ENSG00000180914 | OXTR       | Oxytocin receptor                            | 1.06E-08 |

|                 |         |                                                           |          |
|-----------------|---------|-----------------------------------------------------------|----------|
| ENSG00000179431 | FJX1    | Four-jointed box kinase 1                                 | 1.44E-08 |
| ENSG00000276368 | H2AC14  | H2A clustered histone 14                                  | 2.23E-08 |
| ENSG00000270882 | H4C14   | H4 clustered histone 14                                   | 2.31E-08 |
| ENSG00000116774 | OLFML3  | Olfactomedin like 3                                       | 2.58E-08 |
| ENSG00000147202 | DIAPH2  | Diaphanous related formin 2                               | 3.30E-08 |
| ENSG00000120158 | RCL1    | RNA terminal phosphate cyclase like 1                     | 4.10E-08 |
| ENSG00000162849 | KIF26B  | Kinesin family member 26B                                 | 4.90E-08 |
| ENSG00000117597 | UTP25   | UTP25 small subunit processor component                   | 5.12E-08 |
| ENSG00000074800 | ENO1    | Enolase 1                                                 | 6.29E-08 |
| ENSG00000137124 | ALDH1B1 | Aldehyde dehydrogenase 1 family member B1                 | 7.68E-08 |
| ENSG00000134986 | NREP    | Neuronal regeneration related protein                     | 8.06E-08 |
| ENSG00000120217 | CD274   | CD274 molecule                                            | 8.42E-08 |
| ENSG00000107796 | ACTA2   | Actin alpha 2, smooth muscle                              | 1.23E-07 |
| ENSG00000141052 | MYOCD   | Myocardin                                                 | 1.40E-07 |
| ENSG00000168672 | LRATD2  | LRAT domain containing 2                                  | 1.94E-07 |
| ENSG00000115380 | EFEMP1  | EGF containing fibulin extracellular matrix protein 1     | 1.96E-07 |
| ENSG00000125384 | PTGER2  | Prostaglandin E receptor 2                                | 2.10E-07 |
| ENSG00000135763 | URB2    | URB2 ribosome biogenesis homolog                          | 2.53E-07 |
| ENSG00000125485 | DDX31   | DEAD-box helicase 31                                      | 2.65E-07 |
| ENSG00000274641 | H2BC17  | H2B clustered histone 17                                  | 4.05E-07 |
| ENSG00000174371 | EXO1    | Exonuclease 1                                             | 4.11E-07 |
| ENSG00000123213 | NLN     | Neurolysin                                                | 5.05E-07 |
| ENSG00000170153 | RNF150  | Ring finger protein 150                                   | 5.76E-07 |
| ENSG00000278828 | H3C10   | H3 clustered histone 10                                   | 9.34E-07 |
| ENSG00000113140 | SPARC   | Secreted protein acidic and cysteine rich                 | 9.34E-07 |
| ENSG00000234289 | H2BS1   | H2B.S histone 1                                           | 1.01E-06 |
| ENSG00000019549 | SNAI2   | Snail family transcriptional repressor 2                  | 1.12E-06 |
| ENSG00000146477 | SLC22A3 | Solute carrier family 22 member 3                         | 1.16E-06 |
| ENSG00000120658 | ENOX1   | Ecto-NOX disulfide-thiol exchanger 1                      | 1.17E-06 |
| ENSG00000139278 | GLIPR1  | GLI pathogenesis related 1                                | 1.17E-06 |
| ENSG00000129038 | LOXL1   | Lysyl oxidase like 1                                      | 1.17E-06 |
| ENSG00000144891 | AGTR1   | Angiotensin II receptor type 1                            | 1.27E-06 |
| ENSG00000134775 | FHOD3   | Formin homology 2 domain containing 3                     | 1.27E-06 |
| ENSG00000076248 | UNG     | Uracil DNA glycosylase                                    | 1.27E-06 |
| ENSG00000275221 | H2AC15  | H2A clustered histone 15                                  | 1.32E-06 |
| ENSG00000118596 | SLC16A7 | Solute carrier family 16 member 7                         | 1.59E-06 |
| ENSG00000133019 | CHRM3   | Cholinergic receptor muscarinic 3                         | 1.89E-06 |
| ENSG00000135549 | PKIB    | Camp-dependent protein kinase inhibitor beta              | 2.03E-06 |
| ENSG00000135362 | PRR5L   | Proline rich 5 like                                       | 2.50E-06 |
| ENSG00000153993 | SEMA3D  | Semaphorin 3D                                             | 3.13E-06 |
| ENSG00000189057 | FAM111B | Family with sequence similarity 111 member B              | 3.23E-06 |
| ENSG00000144681 | STAC    | SH3 and cysteine rich domain                              | 3.27E-06 |
| ENSG00000082512 | TRAF5   | TNF receptor associated factor 5                          | 4.26E-06 |
| ENSG00000170017 | ALCAM   | Activated leukocyte cell adhesion molecule                | 4.42E-06 |
| ENSG00000243955 | GSTA1   | Glutathione S-transferase alpha 1                         | 4.56E-06 |
| ENSG00000196456 | ZNF775  | Zinc finger protein 775                                   | 4.56E-06 |
| ENSG00000154734 | ADAMTS1 | ADAM metalloproteinase with thrombospondin type 1 motif 1 | 4.90E-06 |
| ENSG00000178409 | BEND3   | BEN domain containing 3                                   | 4.90E-06 |
| ENSG00000101868 | POLA1   | DNA polymerase alpha 1, catalytic subunit                 | 5.53E-06 |
| ENSG00000197238 | H4C11   | H4 clustered histone 11                                   | 5.88E-06 |

|                 |          |                                                                                                                            |          |
|-----------------|----------|----------------------------------------------------------------------------------------------------------------------------|----------|
| ENSG00000115648 | MLPH     | Melanophilin                                                                                                               | 6.14E-06 |
| ENSG00000003989 | SLC7A2   | Solute carrier family 7 member 2                                                                                           | 6.14E-06 |
| ENSG00000133107 | TRPC4    | Transient receptor potential cation channel subfamily C member 4                                                           | 6.14E-06 |
| ENSG00000134285 | FKBP11   | FKBP prolyl isomerase 11                                                                                                   | 6.17E-06 |
| ENSG00000157168 | NRG1     | Neuregulin 1                                                                                                               | 6.50E-06 |
| ENSG00000119285 | HEATR1   | HEAT repeat containing 1                                                                                                   | 6.72E-06 |
| ENSG00000101361 | NOP56    | NOP56 ribonucleoprotein                                                                                                    | 7.16E-06 |
| ENSG00000150687 | PRSS23   | Serine protease 23                                                                                                         | 7.20E-06 |
| ENSG00000185760 | KCNQ5    | Potassium voltage-gated channel subfamily Q member 5                                                                       | 7.31E-06 |
| ENSG00000151376 | ME3      | Malic enzyme 3                                                                                                             | 7.95E-06 |
| ENSG00000164619 | BMPER    | BMP binding endothelial regulator                                                                                          | 9.52E-06 |
| ENSG00000115461 | IGFBP5   | Insulin like growth factor binding protein 5                                                                               | 9.62E-06 |
| ENSG00000091986 | CCDC80   | Coiled-coil domain containing 80                                                                                           | 9.62E-06 |
| ENSG00000178695 | KCTD12   | Potassium channel tetramerization domain containing 12                                                                     | 9.62E-06 |
| ENSG00000182240 | BACE2    | Beta-secretase 2                                                                                                           | 9.62E-06 |
| ENSG00000172197 | MBOAT1   | Membrane bound O-acyltransferase domain containing 1                                                                       | 1.01E-05 |
| ENSG00000158406 | H4C8     | H4 clustered histone 8                                                                                                     | 1.07E-05 |
| ENSG00000143179 | UCK2     | Uridine-cytidine kinase 2                                                                                                  | 1.28E-05 |
| ENSG00000104356 | POP1     | POP1 homolog, ribonuclease P/MRP subunit                                                                                   | 1.36E-05 |
| ENSG00000196950 | SLC39A10 | Solute carrier family 39 member 10                                                                                         | 1.68E-05 |
| ENSG00000180573 | H2AC6    | H2A clustered histone 6                                                                                                    | 1.76E-05 |
| ENSG00000182197 | EXT1     | Exostosin glycosyltransferase 1                                                                                            | 1.86E-05 |
| ENSG00000233822 | H2BC15   | H2B clustered histone 15                                                                                                   | 1.91E-05 |
| ENSG00000080823 | MOK      | MOK protein kinase                                                                                                         | 2.18E-05 |
| ENSG00000136111 | TBC1D4   | TBC1 domain family member 4                                                                                                | 2.48E-05 |
| ENSG00000234571 | H2BP2    | H2B histone pseudogene 2                                                                                                   | 2.54E-05 |
| ENSG00000184678 | H2BC21   | H2B clustered histone 21                                                                                                   | 2.65E-05 |
| ENSG00000116679 | IVNS1ABP | Influenza virus NS1A binding protein                                                                                       | 2.65E-05 |
| ENSG00000120254 | MTHFD1L  | Methylenetetrahydrofolate dehydrogenase (NADP+ dependent) 1 like                                                           | 2.83E-05 |
| ENSG00000120708 | TGFBI    | Transforming growth factor beta induced                                                                                    | 2.83E-05 |
| ENSG00000145934 | TENM2    | Teneurin transmembrane protein 2                                                                                           | 2.94E-05 |
| ENSG00000154646 | TMPRSS15 | Transmembrane serine protease 15                                                                                           | 3.00E-05 |
| ENSG00000135919 | SERPINE2 | Serpin family E member 2                                                                                                   | 3.03E-05 |
| ENSG00000128510 | CPA4     | Carboxypeptidase A4                                                                                                        | 3.04E-05 |
| ENSG00000122870 | BICC1    | Bicc family RNA binding protein 1                                                                                          | 3.37E-05 |
| ENSG00000144354 | CDCA7    | Cell division cycle associated 7                                                                                           | 4.30E-05 |
| ENSG00000120594 | PLXDC2   | Plexin domain containing 2                                                                                                 | 4.44E-05 |
| ENSG00000060982 | BCAT1    | Branched chain amino acid transaminase 1                                                                                   | 4.53E-05 |
| ENSG00000070404 | FSTL3    | Follistatin like 3                                                                                                         | 4.53E-05 |
| ENSG00000172927 | MYEOV    | Myeloma overexpressed                                                                                                      | 4.61E-05 |
| ENSG00000111057 | KRT18    | Keratin 18                                                                                                                 | 4.70E-05 |
| ENSG00000183010 | PYCR1    | Pyrroline-5-carboxylate reductase 1                                                                                        | 5.04E-05 |
| ENSG00000168003 | SLC3A2   | Solute carrier family 3 member 2                                                                                           | 5.06E-05 |
| ENSG00000164176 | EDIL3    | EGF like repeats and discoidin domains 3                                                                                   | 5.33E-05 |
| ENSG00000139211 | AMIGO2   | Adhesion molecule with Ig like domain 2                                                                                    | 5.45E-05 |
| ENSG00000159131 | GART     | Phosphoribosylglycinamide formyltransferase, phosphoribosylglycinamide synthetase, phosphoribosylaminoimidazole synthetase | 5.66E-05 |
| ENSG00000180535 | BHLHA15  | Basic helix-loop-helix family member a15                                                                                   | 5.69E-05 |

|                 |          |                                                                                                      |          |
|-----------------|----------|------------------------------------------------------------------------------------------------------|----------|
| ENSG00000119537 | KDSR     | 3-ketodihydrosphingosine reductase                                                                   | 6.27E-05 |
| ENSG00000187840 | EIF4EBP1 | Eukaryotic translation initiation factor 4E binding protein 1                                        | 6.85E-05 |
| ENSG00000124635 | H2BC11   | H2B clustered histone 11                                                                             | 7.05E-05 |
| ENSG00000145675 | PIK3R1   | Phosphoinositide-3-kinase regulatory subunit 1                                                       | 8.01E-05 |
| ENSG00000115232 | ITGA4    | Integrin subunit alpha 4                                                                             | 8.35E-05 |
| ENSG00000204291 | COL15A1  | Collagen type XV alpha 1 chain                                                                       | 9.03E-05 |
| ENSG00000181751 | C5orf30  | Chromosome 5 open reading frame 30                                                                   | 9.28E-05 |
| ENSG00000113739 | STC2     | Stanniocalcin 2                                                                                      | 9.45E-05 |
| ENSG00000136261 | BZW2     | Basic leucine zipper and W2 domains 2                                                                | 9.62E-05 |
| ENSG00000265107 | GJA5     | Gap junction protein alpha 5                                                                         | 0.000101 |
| ENSG00000117394 | SLC2A1   | Solute carrier family 2 member 1                                                                     | 0.000107 |
| ENSG00000161647 | MPP3     | Membrane palmitoylated protein 3                                                                     | 0.000113 |
| ENSG00000157483 | MYO1E    | Myosin IE                                                                                            | 0.000134 |
| ENSG00000102271 | KLHL4    | Kelch like family member 4                                                                           | 0.000142 |
| ENSG00000128050 | PAICS    | Phosphoribosylaminoimidazole carboxylase and phosphoribosylaminoimidazolesuccinocarboxamide synthase | 0.000142 |
| ENSG00000132669 | RIN2     | Ras and Rab interactor 2                                                                             | 0.000147 |
| ENSG00000153823 | PID1     | Phosphotyrosine interaction domain containing 1                                                      | 0.000148 |
| ENSG00000170854 | RIOX2    | Ribosomal oxygenase 2                                                                                | 0.000154 |
| ENSG00000141569 | TRIM65   | Tripartite motif containing 65                                                                       | 0.000154 |
| ENSG00000122420 | PTGFR    | Prostaglandin F receptor                                                                             | 0.000155 |
| ENSG00000109861 | CTSC     | Cathepsin C                                                                                          | 0.000173 |
| ENSG00000197837 | H4-16    | H4 histone 16                                                                                        | 0.000184 |
| ENSG00000112276 | BVES     | Blood vessel epicardial substance                                                                    | 0.000192 |
| ENSG00000198796 | ALPK2    | Alpha kinase 2                                                                                       | 0.000194 |
| ENSG00000111885 | MAN1A1   | Mannosidase alpha class 1A member 1                                                                  | 0.000195 |
| ENSG00000183722 | LHFPL6   | LHFPL tetraspan subfamily member 6                                                                   | 0.000195 |
| ENSG00000054277 | OPN3     | Opsin 3                                                                                              | 0.000198 |
| ENSG00000113013 | HSPA9    | Heat shock protein family A (Hsp70) member 9                                                         | 0.000203 |
| ENSG00000186854 | TRABD2A  | Trab domain containing 2A                                                                            | 0.000209 |
| ENSG00000156265 | MAP3K7CL | MAP3K7 C-terminal like                                                                               | 0.000209 |
| ENSG00000145416 | MARCHF1  | Membrane associated ring-CH-type finger 1                                                            | 0.000212 |
| ENSG00000176697 | BDNF     | Brain derived neurotrophic factor                                                                    | 0.000225 |
| ENSG00000275126 | H4C13    | H4 clustered histone 13                                                                              | 0.000229 |
| ENSG00000178776 | C5orf46  | Chromosome 5 open reading frame 46                                                                   | 0.000243 |
| ENSG00000050344 | NFE2L3   | Nuclear factor, erythroid 2 like 3                                                                   | 0.000254 |
| ENSG00000243444 |          |                                                                                                      | 0.000257 |
| ENSG00000181418 | DDN      | Dendrin                                                                                              | 0.000262 |
| ENSG00000186480 | INSIG1   | Insulin induced gene 1                                                                               | 0.000279 |
| ENSG00000156398 | SFXN2    | Sideroflexin 2                                                                                       | 0.000292 |
| ENSG00000140416 | TPM1     | Tropomyosin 1                                                                                        | 0.000298 |
| ENSG00000152661 | GJA1     | Gap junction protein alpha 1                                                                         | 0.000303 |
| ENSG00000179104 | TMTC2    | Transmembrane O-mannosyltransferase targeting cadherins 2                                            | 0.00032  |
| ENSG00000187193 | MT1X     | Metallothionein 1X                                                                                   | 0.000331 |
| ENSG00000111186 | WNT5B    | Wnt family member 5B                                                                                 | 0.00034  |
| ENSG00000106105 | GARS1    | Glycyl-trna synthetase 1                                                                             | 0.000342 |
| ENSG00000197061 | H4C3     | H4 clustered histone 3                                                                               | 0.00037  |
| ENSG00000117877 | CD3EAP   | CD3e molecule associated protein                                                                     | 0.000394 |

|                 |           |                                                                      |          |
|-----------------|-----------|----------------------------------------------------------------------|----------|
| ENSG00000132768 | DPH2      | Diphthamide biosynthesis 2                                           | 0.000403 |
| ENSG00000206190 | ATP10A    | Atpase phospholipid transporting 10A (putative)                      | 0.000403 |
| ENSG00000166333 | ILK       | Integrin linked kinase                                               | 0.000405 |
| ENSG00000189212 | DPY19L2P1 | DPY19L2 pseudogene 1                                                 | 0.000415 |
| ENSG00000150051 | MKX       | Mohawk homeobox                                                      | 0.00042  |
| ENSG00000071575 | TRIB2     | Tribbles pseudokinase 2                                              | 0.00042  |
| ENSG00000166002 | SMCO4     | Single-pass membrane protein with coiled-coil domains 4              | 0.000429 |
| ENSG00000159176 | CSRP1     | Cysteine and glycine rich protein 1                                  | 0.00044  |
| ENSG00000157064 | NMNAT2    | Nicotinamide nucleotide adenylyltransferase 2                        | 0.000459 |
| ENSG00000244067 | GSTA2     | Glutathione S-transferase alpha 2                                    | 0.00046  |
| ENSG00000082516 | GEMIN5    | Gem nuclear organelle associated protein 5                           | 0.000482 |
| ENSG00000141384 | TAF4B     | TATA-box binding protein associated factor 4b                        | 0.000487 |
| ENSG00000198947 | DMD       | Dystrophin                                                           | 0.000543 |
| ENSG00000143314 | MRPL24    | Mitochondrial ribosomal protein L24                                  | 0.000546 |
| ENSG00000148484 | RSU1      | Ras suppressor protein 1                                             | 0.000547 |
| ENSG00000278705 | H4C2      | H4 clustered histone 2                                               | 0.000554 |
| ENSG00000026559 | KCNG1     | Potassium voltage-gated channel modifier subfamily G member 1        | 0.000554 |
| ENSG00000072274 | TFRC      | Transferrin receptor                                                 | 0.000581 |
| ENSG00000125257 | ABCC4     | ATP binding cassette subfamily C member 4                            | 0.000589 |
| ENSG00000101546 | RBFA      | Ribosome binding factor A                                            | 0.000589 |
| ENSG00000170515 | PA2G4     | Proliferation-associated 2G4                                         | 0.00059  |
| ENSG00000105810 | CDK6      | Cyclin dependent kinase 6                                            | 0.000593 |
| ENSG00000106366 | SERPINE1  | Serpin family E member 1                                             | 0.000603 |
| ENSG00000120800 | UTP20     | UTP20 small subunit processome component                             | 0.000614 |
| ENSG00000091527 | CDV3      | CDV3 homolog                                                         | 0.000625 |
| ENSG00000163083 | INHBB     | Inhibin subunit beta B                                               | 0.000634 |
| ENSG00000115107 | STEAP3    | STEAP3 metalloreductase                                              | 0.000634 |
| ENSG00000238243 | OR2W3     | Olfactory receptor family 2 subfamily W member 3                     | 0.000634 |
| ENSG00000189007 | ADAT2     | Adenosine deaminase trna specific 2                                  | 0.000662 |
| ENSG00000162419 | GMEB1     | Glucocorticoid modulatory element binding protein 1                  | 0.000662 |
| ENSG00000143157 | POGK      | Pogo transposable element derived with KRAB domain                   | 0.000797 |
| ENSG00000053372 | MRT04     | MRT4 homolog, ribosome maturation factor                             | 0.000798 |
| ENSG00000121057 | AKAP1     | A-kinase anchoring protein 1                                         | 0.000807 |
| ENSG00000125458 | NT5C      | 5', 3'-nucleotidase, cytosolic                                       | 0.000819 |
| ENSG00000196730 | DAPK1     | Death associated protein kinase 1                                    | 0.000839 |
| ENSG00000164649 | CDCA7L    | Cell division cycle associated 7 like                                | 0.000853 |
| ENSG00000140945 | CDH13     | Cadherin 13                                                          | 0.000869 |
| ENSG00000106628 | POLD2     | DNA polymerase delta 2, accessory subunit                            | 0.000872 |
| ENSG00000170876 | TMEM43    | Transmembrane protein 43                                             | 0.000873 |
| ENSG00000152256 | PDK1      | Pyruvate dehydrogenase kinase 1                                      | 0.000879 |
| ENSG00000149485 | FADS1     | Fatty acid desaturase 1                                              | 0.000887 |
| ENSG00000255561 | FDXACB1   | Ferredoxin-fold anticodon binding domain containing 1                | 0.000887 |
| ENSG00000072682 | P4HA2     | Prolyl 4-hydroxylase subunit alpha 2                                 | 0.000892 |
| ENSG00000106799 | TGFBR1    | Transforming growth factor beta receptor 1                           | 0.000944 |
| ENSG00000219607 | PPP1R3G   | Protein phosphatase 1 regulatory subunit 3G                          | 0.000946 |
| ENSG00000164687 | FABP5     | Fatty acid binding protein 5                                         | 0.00098  |
| ENSG00000144824 | PHLDB2    | Pleckstrin homology like domain family B member 2                    | 0.000988 |
| ENSG00000168405 | CMAHP     | Cytidine monophospho-N-acetylneuraminic acid hydroxylase, pseudogene | 0.00103  |
| ENSG00000134987 | WDR36     | WD repeat domain 36                                                  | 0.001108 |

|                 |          |                                                               |          |
|-----------------|----------|---------------------------------------------------------------|----------|
| ENSG00000197646 | PDCD1LG2 | Programmed cell death 1 ligand 2                              | 0.001122 |
| ENSG00000183496 | MEX3B    | Mex-3 RNA binding family member B                             | 0.001154 |
| ENSG00000276966 | H4C5     | H4 clustered histone 5                                        | 0.001243 |
| ENSG00000168542 | COL3A1   | Collagen type III alpha 1 chain                               | 0.001294 |
| ENSG00000251493 | FOXD1    | Forkhead box D1                                               | 0.0013   |
| ENSG00000113657 | DPYSL3   | Dihydropyrimidinase like 3                                    | 0.00132  |
| ENSG00000135318 | NT5E     | 5'-nucleotidase ecto                                          | 0.001363 |
| ENSG00000247626 | MARS2    | Methionyl-trna synthetase 2, mitochondrial                    | 0.001384 |
| ENSG00000137054 | POLR1E   | RNA polymerase I subunit E                                    | 0.001412 |
| ENSG00000181201 | H2BU2P   | H2B.U histone 2, pseudogene                                   | 0.001435 |
| ENSG00000135312 | HTR1B    | 5-hydroxytryptamine receptor 1B                               | 0.001451 |
| ENSG00000085276 | MECOM    | MDS1 and EVI1 complex locus                                   | 0.00147  |
| ENSG00000113578 | FGF1     | Fibroblast growth factor 1                                    | 0.001568 |
| ENSG00000087116 | ADAMTS2  | ADAM metallopeptidase with thrombospondin type 1 motif 2      | 0.001648 |
| ENSG00000137819 | PAQR5    | Progesterin and adipog receptor family member 5               | 0.001648 |
| ENSG00000178860 | MSC      | Musculin                                                      | 0.001696 |
| ENSG00000136933 | RABEPK   | Rab9 effector protein with kelch motifs                       | 0.001798 |
| ENSG00000165175 | MID1IP1  | MID1 interacting protein 1                                    | 0.001861 |
| ENSG00000138356 | AOX1     | Aldehyde oxidase 1                                            | 0.001898 |
| ENSG00000091136 | LAMB1    | Laminin subunit beta 1                                        | 0.001906 |
| ENSG00000180611 | MB21D2   | Mab-21 domain containing 2                                    | 0.001936 |
| ENSG00000196352 | CD55     | CD55 molecule (Cromer blood group)                            | 0.001936 |
| ENSG00000177191 | B3GNT8   | UDP-glcnae:betagal beta-1,3-N-acetylglucosaminyltransferase 8 | 0.001944 |
| ENSG00000102452 | NALCN    | Sodium leak channel, non-selective                            | 0.001944 |
| ENSG00000278637 | H4C1     | H4 clustered histone 1                                        | 0.00195  |
| ENSG00000173457 | PPP1R14B | Protein phosphatase 1 regulatory inhibitor subunit 14B        | 0.00195  |
| ENSG00000196890 | H2BU1    | H2B.U histone 1                                               | 0.002024 |
| ENSG00000273703 | H2BC14   | H2B clustered histone 14                                      | 0.002187 |
| ENSG00000065150 | IPO5     | Importin 5                                                    | 0.002231 |
| ENSG00000116132 | PRRX1    | Paired related homeobox 1                                     | 0.002263 |
| ENSG00000039139 | DNAH5    | Dynein axonemal heavy chain 5                                 | 0.002444 |
| ENSG00000039560 | RAI14    | Retinoic acid induced 14                                      | 0.002464 |
| ENSG00000079156 | OSBPL6   | Oxysterol binding protein like 6                              | 0.002528 |
| ENSG00000141668 | CBLN2    | Cerebellin 2 precursor                                        | 0.002552 |
| ENSG00000158716 | DUSP23   | Dual specificity phosphatase 23                               | 0.002639 |
| ENSG00000158483 | FAM86C1  | Family with sequence similarity 86 member C1                  | 0.002657 |
| ENSG00000144867 | SRPRB    | SRP receptor subunit beta                                     | 0.00275  |
| ENSG00000186340 | THBS2    | Thrombospondin 2                                              | 0.002815 |
| ENSG00000112773 | TENT5A   | Terminal nucleotidyltransferase 5A                            | 0.002853 |
| ENSG00000135245 | HILPDA   | Hypoxia inducible lipid droplet associated                    | 0.002957 |
| ENSG00000198081 | ZBTB14   | Zinc finger and BTB domain containing 14                      | 0.003085 |
| ENSG00000138074 | SLC5A6   | Solute carrier family 5 member 6                              | 0.003124 |
| ENSG00000169432 | SCN9A    | Sodium voltage-gated channel alpha subunit 9                  | 0.003312 |
| ENSG00000156471 | PTDSS1   | Phosphatidylserine synthase 1                                 | 0.00336  |
| ENSG00000171492 | LRR8D    | Leucine rich repeat containing 8 VRAC subunit D               | 0.00348  |
| ENSG00000153885 | KCTD15   | Potassium channel tetramerization domain containing 15        | 0.003522 |
| ENSG00000144749 | LRIG1    | Leucine rich repeats and immunoglobulin like domains 1        | 0.00357  |
| ENSG00000137801 | THBS1    | Thrombospondin 1                                              | 0.003584 |
| ENSG00000019186 | CYP24A1  | Cytochrome P450 family 24 subfamily A member 1                | 0.003591 |



|                 |            |                                                                   |          |
|-----------------|------------|-------------------------------------------------------------------|----------|
| ENSG00000176171 | BNIP3      | BCL2 interacting protein 3                                        | 0.00361  |
| ENSG00000139329 | LUM        | Lumican                                                           | 0.00362  |
| ENSG00000151892 | GFRA1      | GDNF family receptor alpha 1                                      | 0.003685 |
| ENSG00000120256 | LRP11      | LDL receptor related protein 11                                   | 0.003702 |
| ENSG00000159399 | HK2        | Hexokinase 2                                                      | 0.003751 |
| ENSG00000139263 | LRIG3      | Leucine rich repeats and immunoglobulin like domains 3            | 0.003752 |
| ENSG00000111371 | SLC38A1    | Solute carrier family 38 member 1                                 | 0.003774 |
| ENSG00000162433 | AK4        | Adenylate kinase 4                                                | 0.003837 |
| ENSG00000135446 | CDK4       | Cyclin dependent kinase 4                                         | 0.003837 |
| ENSG00000168502 | MTCL1      | Microtubule crosslinking factor 1                                 | 0.003917 |
| ENSG00000130299 | GTPBP3     | GTP binding protein 3, mitochondrial                              | 0.003955 |
| ENSG00000099250 | NRP1       | Neuropilin 1                                                      | 0.004047 |
| ENSG00000102743 | SLC25A15   | Solute carrier family 25 member 15                                | 0.004106 |
| ENSG00000144642 | RBMS3      | RNA binding motif single stranded interacting protein 3           | 0.004204 |
| ENSG00000117152 | RGS4       | Regulator of G protein signaling 4                                | 0.004258 |
| ENSG00000164284 | GRPEL2     | Grpe like 2, mitochondrial                                        | 0.004259 |
| ENSG00000184675 | AMER1      | APC membrane recruitment protein 1                                | 0.004295 |
| ENSG00000181982 | CCDC149    | Coiled-coil domain containing 149                                 | 0.004328 |
| ENSG00000100234 | TIMP3      | TIMP metalloproteinase inhibitor 3                                | 0.004328 |
| ENSG00000147883 | CDKN2B     | Cyclin dependent kinase inhibitor 2B                              | 0.004328 |
| ENSG00000075142 | SRI        | Sorcin                                                            | 0.004328 |
| ENSG00000105855 | ITGB8      | Integrin subunit beta 8                                           | 0.004477 |
| ENSG00000125863 | MKKS       | Mckusick-Kaufman syndrome                                         | 0.004498 |
| ENSG00000165030 | NFIL3      | Nuclear factor, interleukin 3 regulated                           | 0.00456  |
| ENSG00000198121 | LPAR1      | Lysophosphatidic acid receptor 1                                  | 0.00459  |
| ENSG00000174827 | PDZK1      | PDZ domain containing 1                                           | 0.004596 |
| ENSG00000174136 | RGMB       | Repulsive guidance molecule BMP co-receptor b                     | 0.004608 |
| ENSG00000176055 | MBLAC2     | Metallo-beta-lactamase domain containing 2                        | 0.004633 |
| ENSG00000239264 | TXNDC5     | Thioredoxin domain containing 5                                   | 0.004707 |
| ENSG00000145242 | EPHA5      | EPH receptor A5                                                   | 0.004763 |
| ENSG00000203805 | PLPP4      | Phospholipid phosphatase 4                                        | 0.004798 |
| ENSG00000123096 | SSPN       | Sarcospan                                                         | 0.004887 |
| ENSG00000113721 | PDGFRB     | Platelet derived growth factor receptor beta                      | 0.005066 |
| ENSG00000141858 | SAMD1      | Sterile alpha motif domain containing 1                           | 0.005111 |
| ENSG00000186523 | FAM86B1    | Family with sequence similarity 86 member B1                      | 0.005182 |
| ENSG00000148848 | ADAM12     | ADAM metalloproteinase domain 12                                  | 0.005341 |
| ENSG00000154978 | VOPP1      | VOPP1 WW domain binding protein                                   | 0.005411 |
| ENSG00000160193 | WDR4       | WD repeat domain 4                                                | 0.005522 |
| ENSG00000242114 | MTFP1      | Mitochondrial fission process 1                                   | 0.005545 |
| ENSG00000155858 | LSM11      | LSM11, U7 small nuclear RNA associated                            | 0.005565 |
| ENSG00000150938 | CRIM1      | Cysteine rich transmembrane BMP regulator 1                       | 0.005736 |
| ENSG00000196517 | SLC6A9     | Solute carrier family 6 member 9                                  | 0.005763 |
| ENSG00000103196 | CRISPLD2   | Cysteine rich secretory protein LCCL domain containing 2          | 0.005843 |
| ENSG00000115657 | ABCB6      | ATP binding cassette subfamily B member 6 (Langereis blood group) | 0.006087 |
| ENSG00000244026 | FAM86DP    | Family with sequence similarity 86 member D, pseudogene           | 0.006251 |
| ENSG00000185070 | FLRT2      | Fibronectin leucine rich transmembrane protein 2                  | 0.006328 |
| ENSG00000145990 | GFOD1      | Glucose-fructose oxidoreductase domain containing 1               | 0.006334 |
| ENSG00000180448 | AC004151.1 | Rho gtpase activating protein 45                                  | 0.006347 |

|                 |          |                                                                            |          |
|-----------------|----------|----------------------------------------------------------------------------|----------|
| ENSG00000186352 | ANKRD37  | Ankyrin repeat domain 37                                                   | 0.006347 |
| ENSG00000164107 | HAND2    | Heart and neural crest derivatives expressed 2                             | 0.006383 |
| ENSG00000112902 | SEMA5A   | Semaphorin 5A                                                              | 0.006533 |
| ENSG00000021645 | NRXN3    | Neurexin 3                                                                 | 0.006619 |
| ENSG00000241697 | TMEFF1   | Transmembrane protein with EGF like and two follistatin like domains 1     | 0.00664  |
| ENSG00000181588 | MEX3D    | Mex-3 RNA binding family member D                                          | 0.006658 |
| ENSG00000184009 | ACTG1    | Actin gamma 1                                                              | 0.00675  |
| ENSG00000167778 | SPRYD3   | SPRY domain containing 3                                                   | 0.006961 |
| ENSG00000073536 | NLE1     | Notchless homolog 1                                                        | 0.007115 |
| ENSG00000203668 | CHML     | CHM like Rab escort protein                                                | 0.007195 |
| ENSG00000112365 | ZBTB24   | Zinc finger and BTB domain containing 24                                   | 0.0073   |
| ENSG00000103522 | IL21R    | Interleukin 21 receptor                                                    | 0.007366 |
| ENSG00000183023 | SLC8A1   | Solute carrier family 8 member A1                                          | 0.007393 |
| ENSG00000150556 | LYPD6B   | LY6/PLAUR domain containing 6B                                             | 0.007412 |
| ENSG00000182173 | TSEN54   | Trna splicing endonuclease subunit 54                                      | 0.007471 |
| ENSG00000123843 | C4BPB    | Complement component 4 binding protein beta                                | 0.007475 |
| ENSG00000167460 | TPM4     | Tropomyosin 4                                                              | 0.007588 |
| ENSG00000117519 | CNN3     | Calponin 3                                                                 | 0.007662 |
| ENSG00000148680 | HTR7     | 5-hydroxytryptamine receptor 7                                             | 0.007768 |
| ENSG00000074410 | CA12     | Carbonic anhydrase 12                                                      | 0.007768 |
| ENSG00000070961 | ATP2B1   | ATPase plasma membrane Ca <sup>2+</sup> transporting 1                     | 0.007768 |
| ENSG00000106484 | MEST     | Mesoderm specific transcript                                               | 0.007815 |
| ENSG00000132661 | NXT1     | Nuclear transport factor 2 like export factor 1                            | 0.007839 |
| ENSG00000049323 | LTBP1    | Latent transforming growth factor beta binding protein 1                   | 0.007859 |
| ENSG00000137547 | MRPL15   | Mitochondrial ribosomal protein L15                                        | 0.008181 |
| ENSG00000166741 | NNMT     | Nicotinamide N-methyltransferase                                           | 0.008199 |
| ENSG00000146281 | PM20D2   | Peptidase M20 domain containing 2                                          | 0.008298 |
| ENSG00000134668 | SPOCD1   | SPOC domain containing 1                                                   | 0.008329 |
| ENSG00000125630 | POLR1B   | RNA polymerase I subunit B                                                 | 0.008495 |
| ENSG00000128973 | CLN6     | CLN6 transmembrane ER protein                                              | 0.008566 |
| ENSG00000038295 | TLL1     | Tolloid like 1                                                             | 0.00859  |
| ENSG00000106772 | PRUNE2   | Prune homolog 2 with BCH domain                                            | 0.008606 |
| ENSG00000174206 | C12orf66 | Chromosome 12 open reading frame 66                                        | 0.00866  |
| ENSG00000171791 | BCL2     | BCL2 apoptosis regulator                                                   | 0.008669 |
| ENSG00000101255 | TRIB3    | Tribbles pseudokinase 3                                                    | 0.009087 |
| ENSG00000133816 | MICAL2   | Microtubule associated monooxygenase, calponin and LIM domain containing 2 | 0.009167 |
| ENSG00000187742 | SECISBP2 | SECIS binding protein 2                                                    | 0.009381 |
| ENSG00000112658 | SRF      | Serum response factor                                                      | 0.009519 |
| ENSG00000125247 | TMTC4    | Transmembrane O-mannosyltransferase targeting cadherins 4                  | 0.009804 |
| ENSG00000119938 | PPP1R3C  | Protein phosphatase 1 regulatory subunit 3C                                | 0.009804 |
| ENSG00000188290 | HES4     | Hes family bHLH transcription factor 4                                     | 0.009834 |
| ENSG00000166289 | PLEKHF1  | Pleckstrin homology and FYVE domain containing 1                           | 0.010088 |
| ENSG00000137273 | FOXF2    | Forkhead box F2                                                            | 0.010511 |
| ENSG00000147485 | PXDNL    | Peroxidasin like                                                           | 0.010573 |
| ENSG00000139370 | SLC15A4  | Solute carrier family 15 member 4                                          | 0.010678 |
| ENSG00000171488 | LRRRC8C  | Leucine rich repeat containing 8 VRAC subunit C                            | 0.010744 |
| ENSG00000261236 | BOP1     | BOP1 ribosomal biogenesis factor                                           | 0.011134 |
| ENSG00000138944 | SHISAL1  | Shisa like 1                                                               | 0.011167 |

|                 |            |                                                          |          |
|-----------------|------------|----------------------------------------------------------|----------|
| ENSG00000131019 | ULBP3      | UL16 binding protein 3                                   | 0.011403 |
| ENSG00000163751 | CPA3       | Carboxypeptidase A3                                      | 0.011513 |
| ENSG00000042832 | TG         | Thyroglobulin                                            | 0.011686 |
| ENSG00000072310 | SREBF1     | Sterol regulatory element binding transcription factor 1 | 0.011686 |
| ENSG00000099725 | PRKY       | Protein kinase Y-linked (pseudogene)                     | 0.011876 |
| ENSG00000130810 | PPAN       | Peter pan homolog                                        | 0.011955 |
| ENSG00000205542 | TMSB4X     | Thymosin beta 4 X-linked                                 | 0.012568 |
| ENSG00000204856 | FAM216A    | Family with sequence similarity 216 member A             | 0.012575 |
| ENSG00000107104 | KANK1      | KN motif and ankyrin repeat domains 1                    | 0.012714 |
| ENSG00000125430 | HS3ST3B1   | Heparan sulfate-glucosamine 3-sulfotransferase 3B1       | 0.012714 |
| ENSG00000145632 | PLK2       | Polo like kinase 2                                       | 0.012735 |
| ENSG00000117479 | SLC19A2    | Solute carrier family 19 member 2                        | 0.012735 |
| ENSG00000112893 | MAN2A1     | Mannosidase alpha class 2A member 1                      | 0.012751 |
| ENSG00000134294 | SLC38A2    | Solute carrier family 38 member 2                        | 0.012751 |
| ENSG00000049192 | ADAMTS6    | ADAM metallopeptidase with thrombospondin type 1 motif 6 | 0.013066 |
| ENSG00000180801 | ARSJ       | Arylsulfatase family member J                            | 0.013066 |
| ENSG00000118894 | EEF2KMT    | Eukaryotic elongation factor 2 lysine methyltransferase  | 0.013108 |
| ENSG00000161547 | SRSF2      | Serine and arginine rich splicing factor 2               | 0.013136 |
| ENSG00000161091 | MFSD12     | Major facilitator superfamily domain containing 12       | 0.0133   |
| ENSG00000080493 | SLC4A4     | Solute carrier family 4 member 4                         | 0.013348 |
| ENSG00000180198 | RCC1       | Regulator of chromosome condensation 1                   | 0.013365 |
| ENSG00000105971 | CAV2       | Caveolin 2                                               | 0.013365 |
| ENSG00000154127 | UBASH3B    | Ubiquitin associated and SH3 domain containing B         | 0.013533 |
| ENSG00000177192 | PUS1       | Pseudouridine synthase 1                                 | 0.013606 |
| ENSG00000102967 | DHODH      | Dihydroorotate dehydrogenase (quinone)                   | 0.013606 |
| ENSG00000077092 | RARB       | Retinoic acid receptor beta                              | 0.013752 |
| ENSG00000277775 | H3C7       | H3 clustered histone 7                                   | 0.013771 |
| ENSG00000176749 | CDK5R1     | Cyclin dependent kinase 5 regulatory subunit 1           | 0.013844 |
| ENSG00000104907 | TRMT1      | Trna methyltransferase 1                                 | 0.013844 |
| ENSG00000153976 | HS3ST3A1   | Heparan sulfate-glucosamine 3-sulfotransferase 3A1       | 0.013874 |
| ENSG00000111450 | STX2       | Syntaxin 2                                               | 0.014621 |
| ENSG00000185238 | PRMT3      | Protein arginine methyltransferase 3                     | 0.014754 |
| ENSG00000254093 | PINX1      | PIN2 (TERF1) interacting telomerase inhibitor 1          | 0.014819 |
| ENSG00000148229 | POLE3      | DNA polymerase epsilon 3, accessory subunit              | 0.01538  |
| ENSG00000171208 | NETO2      | Neuropilin and tolloid like 2                            | 0.015481 |
| ENSG00000213853 | EMP2       | Epithelial membrane protein 2                            | 0.015481 |
| ENSG00000138448 | ITGAV      | Integrin subunit alpha V                                 | 0.015481 |
| ENSG00000160208 | RRP1B      | Ribosomal RNA processing 1B                              | 0.015481 |
| ENSG00000124787 | RPP40      | Ribonuclease P/MRP subunit p40                           | 0.0155   |
| ENSG00000184465 | WDR27      | WD repeat domain 27                                      | 0.0155   |
| ENSG00000125266 | EFNB2      | Ephrin B2                                                | 0.0155   |
| ENSG00000244306 | AL589743.1 | Double homeobox A pseudogene 10                          | 0.0155   |
| ENSG00000157193 | LRP8       | LDL receptor related protein 8                           | 0.015728 |
| ENSG00000165732 | DDX21      | Dexd-box helicase 21                                     | 0.015728 |
| ENSG00000154553 | PDLIM3     | PDZ and LIM domain 3                                     | 0.015742 |
| ENSG00000186654 | PRR5       | Proline rich 5                                           | 0.015905 |
| ENSG00000085415 | SEH1L      | SEH1 like nucleoporin                                    | 0.015905 |
| ENSG00000158125 | XDH        | Xanthine dehydrogenase                                   | 0.015948 |
| ENSG00000075223 | SEMA3C     | Semaphorin 3C                                            | 0.015948 |
| ENSG00000122861 | PLAU       | Plasminogen activator, urokinase                         | 0.016158 |

|                 |            |                                                                              |          |
|-----------------|------------|------------------------------------------------------------------------------|----------|
| ENSG00000128294 | TPST2      | Tyrosylprotein sulfotransferase 2                                            | 0.016256 |
| ENSG00000136999 | CCN3       | Cellular communication network factor 3                                      | 0.016269 |
| ENSG00000118508 | RAB32      | RAB32, member RAS oncogene family                                            | 0.016269 |
| ENSG00000117411 | B4GALT2    | Beta-1,4-galactosyltransferase 2                                             | 0.01643  |
| ENSG00000120942 | UBIAD1     | Ubiquitin prenyltransferase domain containing 1                              | 0.016683 |
| ENSG00000116667 | C1orf21    | Chromosome 1 open reading frame 21                                           | 0.017091 |
| ENSG00000234602 | MCIDAS     | Multiciliate differentiation and DNA synthesis associated cell cycle protein | 0.017213 |
| ENSG00000168785 | TSPAN5     | Tetraspanin 5                                                                | 0.017365 |
| ENSG00000093217 | XYLB       | Xylulokinase                                                                 | 0.017815 |
| ENSG00000128272 | ATF4       | Activating transcription factor 4                                            | 0.017815 |
| ENSG00000138741 | TRPC3      | Transient receptor potential cation channel subfamily C member 3             | 0.017853 |
| ENSG00000136720 | HS6ST1     | Heparan sulfate 6-O-sulfotransferase 1                                       | 0.01787  |
| ENSG00000131652 | THOC6      | THO complex 6                                                                | 0.017996 |
| ENSG00000124784 | RIOK1      | RIO kinase 1                                                                 | 0.017996 |
| ENSG00000145287 | PLAC8      | Placenta associated 8                                                        | 0.018116 |
| ENSG00000155846 | PPARGC1B   | PPARG coactivator 1 beta                                                     | 0.018192 |
| ENSG00000183605 | SFXN4      | Sideroflexin 4                                                               | 0.018192 |
| ENSG00000100029 | PES1       | Pescadillo ribosomal biogenesis factor 1                                     | 0.018192 |
| ENSG00000100314 | CABP7      | Calcium binding protein 7                                                    | 0.018223 |
| ENSG00000239672 | NME1       | NME/NM23 nucleoside diphosphate kinase 1                                     | 0.018223 |
| ENSG00000048162 | NOP16      | NOP16 nucleolar protein                                                      | 0.018301 |
| ENSG00000127329 | PTPRB      | Protein tyrosine phosphatase receptor type B                                 | 0.018322 |
| ENSG00000284620 | AF228730.5 | RNA binding protein, fox-1 homolog (C. Elegans) 1 (RBFOX1) pseudogene        | 0.018561 |
| ENSG00000145545 | SRD5A1     | Steroid 5 alpha-reductase 1                                                  | 0.018586 |
| ENSG00000050405 | LIMA1      | LIM domain and actin binding 1                                               | 0.018652 |
| ENSG00000082482 | KCNK2      | Potassium two pore domain channel subfamily K member 2                       | 0.018805 |
| ENSG00000114686 | MRPL3      | Mitochondrial ribosomal protein L3                                           | 0.019114 |
| ENSG00000186847 | KRT14      | Keratin 14                                                                   | 0.019236 |
| ENSG00000165359 | INTS6L     | Integrator complex subunit 6 like                                            | 0.019344 |
| ENSG00000055813 | CCDC85A    | Coiled-coil domain containing 85A                                            | 0.019794 |
| ENSG00000106348 | IMPDH1     | Inosine monophosphate dehydrogenase 1                                        | 0.020452 |
| ENSG00000086848 | ALG9       | ALG9 alpha-1,2-mannosyltransferase                                           | 0.020551 |
| ENSG00000169926 | KLF13      | Kruppel like factor 13                                                       | 0.020703 |
| ENSG00000205426 | KRT81      | Keratin 81                                                                   | 0.020959 |
| ENSG00000162711 | NLRP3      | NLR family pyrin domain containing 3                                         | 0.020959 |
| ENSG00000183527 | PSMG1      | Proteasome assembly chaperone 1                                              | 0.020959 |
| ENSG00000118263 | KLF7       | Kruppel like factor 7                                                        | 0.021223 |
| ENSG00000214706 | IFRD2      | Interferon related developmental regulator 2                                 | 0.021859 |
| ENSG00000150990 | DHX37      | DEAH-box helicase 37                                                         | 0.022255 |
| ENSG00000074582 | BCS1L      | BCS1 homolog, ubiquinol-cytochrome c reductase complex chaperone             | 0.022255 |
| ENSG00000111641 | NOP2       | NOP2 nucleolar protein                                                       | 0.022255 |
| ENSG00000038427 | VCAN       | Versican                                                                     | 0.022425 |
| ENSG00000227120 | AC009238.1 | Pseudogene similar to part of Cdon homolog (mouse) (CDON)                    | 0.023124 |
| ENSG00000109576 | AADAT      | Amino adipate aminotransferase                                               | 0.023985 |
| ENSG00000198478 | SH3BGL2    | SH3 domain binding glutamate rich protein like 2                             | 0.024079 |

|                 |            |                                                            |          |
|-----------------|------------|------------------------------------------------------------|----------|
| ENSG00000071242 | RPS6KA2    | Ribosomal protein S6 kinase A2                             | 0.024148 |
| ENSG00000185304 | RGPD2      | RANBP2 like and GRIP domain containing 2                   | 0.024677 |
| ENSG00000077348 | EXOSC5     | Exosome component 5                                        | 0.02474  |
| ENSG00000106546 | AHR        | Aryl hydrocarbon receptor                                  | 0.02474  |
| ENSG00000147955 | SIGMAR1    | Sigma non-opioid intracellular receptor 1                  | 0.02491  |
| ENSG00000278540 | ACACA      | Acetyl-coa carboxylase alpha                               | 0.024952 |
| ENSG00000175183 | CSRP2      | Cysteine and glycine rich protein 2                        | 0.025037 |
| ENSG00000094804 | CDC6       | Cell division cycle 6                                      | 0.025037 |
| ENSG00000171490 | RSL1D1     | Ribosomal L1 domain containing 1                           | 0.025131 |
| ENSG00000171067 | C11orf24   | Chromosome 11 open reading frame 24                        | 0.025197 |
| ENSG00000116991 | SIPA1L2    | Signal induced proliferation associated 1 like 2           | 0.025231 |
| ENSG00000106263 | EIF3B      | Eukaryotic translation initiation factor 3 subunit B       | 0.025231 |
| ENSG00000111666 | CHPT1      | Choline phosphotransferase 1                               | 0.025327 |
| ENSG00000126785 | RHOJ       | Ras homolog family member J                                | 0.025399 |
| ENSG00000157680 | DGKI       | Diacylglycerol kinase iota                                 | 0.025399 |
| ENSG00000134490 | TMEM241    | Transmembrane protein 241                                  | 0.025878 |
| ENSG00000198142 | SOWAHC     | Sosondowah ankyrin repeat domain family member C           | 0.025919 |
| ENSG00000168209 | DDIT4      | DNA damage inducible transcript 4                          | 0.025984 |
| ENSG00000168496 | FEN1       | Flap structure-specific endonuclease 1                     | 0.025984 |
| ENSG00000122042 | UBL3       | Ubiquitin like 3                                           | 0.026224 |
| ENSG00000071564 | TCF3       | Transcription factor 3                                     | 0.026266 |
| ENSG00000069122 | ADGRF5     | Adhesion G protein-coupled receptor F5                     | 0.026343 |
| ENSG00000151835 | SACS       | Sacsin molecular chaperone                                 | 0.026379 |
| ENSG00000244274 | DBNDD2     | Dysbindin domain containing 2                              | 0.026379 |
| ENSG00000138772 | ANXA3      | Annexin A3                                                 | 0.026554 |
| ENSG00000128951 | DUT        | Deoxyuridine triphosphatase                                | 0.02713  |
| ENSG00000186141 | POLR3C     | RNA polymerase III subunit C                               | 0.027285 |
| ENSG00000251669 | FAM86EP    | Family with sequence similarity 86 member E, pseudogene    | 0.027302 |
| ENSG00000148926 | ADM        | Adrenomedullin                                             | 0.028611 |
| ENSG00000155438 | NIFK       | Nucleolar protein interacting with the FHA domain of MKI67 | 0.028809 |
| ENSG00000102178 | UBL4A      | Ubiquitin like 4A                                          | 0.028971 |
| ENSG00000105185 | PDCD5      | Programmed cell death 5                                    | 0.029192 |
| ENSG00000270276 | H4C15      | H4 clustered histone 15                                    | 0.029418 |
| ENSG00000157827 | FMNL2      | Formin like 2                                              | 0.029504 |
| ENSG00000111799 | COL12A1    | Collagen type XII alpha 1 chain                            | 0.029767 |
| ENSG00000149591 | TAGLN      | Transgelin                                                 | 0.030118 |
| ENSG00000185640 | KRT79      | Keratin 79                                                 | 0.030242 |
| ENSG00000133597 | ADCK2      | Aarf domain containing kinase 2                            | 0.030507 |
| ENSG00000069998 | HDHD5      | Haloacid dehalogenase like hydrolase domain containing 5   | 0.030535 |
| ENSG00000119599 | DCAF4      | DDB1 and CUL4 associated factor 4                          | 0.030564 |
| ENSG00000188549 | CCDC9B     | Coiled-coil domain containing 9B                           | 0.030614 |
| ENSG00000140937 | CDH11      | Cadherin 11                                                | 0.030614 |
| ENSG00000122644 | ARL4A      | ADP ribosylation factor like gtpase 4A                     | 0.030614 |
| ENSG00000284753 | EEF1AKMT4  | EEF1A lysine methyltransferase 4                           | 0.030729 |
| ENSG00000066583 | ISOC1      | Isochorismatase domain containing 1                        | 0.030878 |
| ENSG00000131378 | RFTN1      | Raftlin, lipid raft linker 1                               | 0.030923 |
| ENSG00000288031 | AC093838.2 | Novel pseudogene                                           | 0.031492 |
| ENSG00000159199 | ATP5MC1    | ATP synthase membrane subunit c locus 1                    | 0.031728 |

|                 |            |                                                           |          |
|-----------------|------------|-----------------------------------------------------------|----------|
| ENSG00000143476 | DTL        | Denticleless E3 ubiquitin protein ligase homolog          | 0.031757 |
| ENSG00000186918 | ZNF395     | Zinc finger protein 395                                   | 0.031907 |
| ENSG00000154122 | ANKH       | ANKH inorganic pyrophosphate transport regulator          | 0.031907 |
| ENSG00000256667 | KLRA1P     | Killer cell lectin like receptor A1, pseudogene           | 0.032072 |
| ENSG00000085840 | ORC1       | Origin recognition complex subunit 1                      | 0.032072 |
| ENSG00000124766 | SOX4       | SRY-box transcription factor 4                            | 0.032844 |
| ENSG00000160214 | RRP1       | Ribosomal RNA processing 1                                | 0.032855 |
| ENSG00000065485 | PDIA5      | Protein disulfide isomerase family A member 5             | 0.033075 |
| ENSG00000065183 | WDR3       | WD repeat domain 3                                        | 0.033075 |
| ENSG00000134917 | ADAMTS8    | ADAM metalloproteinase with thrombospondin type 1 motif 8 | 0.033107 |
| ENSG00000011677 | GABRA3     | Gamma-aminobutyric acid type A receptor alpha3 subunit    | 0.033107 |
| ENSG00000165724 | ZMYND19    | Zinc finger MYND-type containing 19                       | 0.033107 |
| ENSG00000156697 | UTP14A     | UTP14A small subunit processome component                 | 0.033107 |
| ENSG00000154319 | FAM167A    | Family with sequence similarity 167 member A              | 0.033469 |
| ENSG00000138347 | MYPN       | Myopalladin                                               | 0.033855 |
| ENSG00000213585 | VDAC1      | Voltage dependent anion channel 1                         | 0.033855 |
| ENSG00000177425 | PAWR       | Pro-apoptotic WT1 regulator                               | 0.033855 |
| ENSG00000103888 | CEMP1      | Cell migration inducing hyaluronidase 1                   | 0.034194 |
| ENSG00000106511 | MEOX2      | Mesenchyme homeobox 2                                     | 0.034267 |
| ENSG00000205221 | VIT        | Vitrin                                                    | 0.034281 |
| ENSG00000170802 | FOXN2      | Forkhead box N2                                           | 0.034281 |
| ENSG00000268089 | GABRQ      | Gamma-aminobutyric acid type A receptor theta subunit     | 0.034835 |
| ENSG00000154736 | ADAMTS5    | ADAM metalloproteinase with thrombospondin type 1 motif 5 | 0.035587 |
| ENSG00000114850 | SSR3       | Signal sequence receptor subunit 3                        | 0.036362 |
| ENSG00000136877 | FPGS       | Folylpolyglutamate synthase                               | 0.036362 |
| ENSG00000122641 | INHBA      | Inhibin subunit beta A                                    | 0.036563 |
| ENSG00000100664 | EIF5       | Eukaryotic translation initiation factor 5                | 0.036563 |
| ENSG00000041982 | TNC        | Tenascin C                                                | 0.036947 |
| ENSG00000132359 | AC002316.1 | RAP1 gtpase activating protein 2                          | 0.037175 |
| ENSG00000148120 | AOPEP      | Aminopeptidase O (putative)                               | 0.037191 |
| ENSG00000109452 | INPP4B     | Inositol polyphosphate-4-phosphatase type II B            | 0.037506 |
| ENSG00000114251 | WNT5A      | Wnt family member 5A                                      | 0.037551 |
| ENSG00000136813 | ECPAS      | Ecm29 proteasome adaptor and scaffold                     | 0.037611 |
| ENSG00000144233 | AMMECR1L   | AMMECR1 like                                              | 0.037686 |
| ENSG00000220201 | ZGLP1      | Zinc finger GATA like protein 1                           | 0.037722 |
| ENSG00000145685 | LHFPL2     | LHFPL tetraspan subfamily member 2                        | 0.038198 |
| ENSG00000105976 | MET        | MET proto-oncogene, receptor tyrosine kinase              | 0.038662 |
| ENSG00000165617 | DACT1      | Dishevelled binding antagonist of beta catenin 1          | 0.039097 |
| ENSG00000264230 | ANXA8L1    | Annexin A8 like 1                                         | 0.039791 |
| ENSG00000187123 | LYPD6      | LY6/PLAUR domain containing 6                             | 0.040303 |
| ENSG00000136379 | ABHD17C    | Abhydrolase domain containing 17C                         | 0.040533 |
| ENSG00000130826 | DKC1       | Dyskerin pseudouridine synthase 1                         | 0.040533 |
| ENSG00000130204 | TOMM40     | Translocase of outer mitochondrial membrane 40            | 0.040533 |
| ENSG00000198912 | C1orf174   | Chromosome 1 open reading frame 174                       | 0.040542 |
| ENSG00000183098 | GPC6       | Glypican 6                                                | 0.040569 |
| ENSG00000114423 | CBLB       | Cbl proto-oncogene B                                      | 0.040686 |
| ENSG00000175305 | CCNE2      | Cyclin E2                                                 | 0.040735 |
| ENSG00000004660 | CAMKK1     | Calcium/calmodulin dependent protein kinase kinase 1      | 0.04092  |

|                 |           |                                                         |          |
|-----------------|-----------|---------------------------------------------------------|----------|
| ENSG00000079150 | FKBP7     | FKBP prolyl isomerase 7                                 | 0.040951 |
| ENSG00000138758 | SEPTIN11  | Septin 11                                               | 0.041077 |
| ENSG00000162746 | FCRLB     | Fc receptor like B                                      | 0.041766 |
| ENSG00000124370 | MCEE      | Methylmalonyl-coa epimerase                             | 0.042041 |
| ENSG00000115414 | FN1       | Fibronectin 1                                           | 0.042709 |
| ENSG00000116761 | CTH       | Cystathionine gamma-lyase                               | 0.042711 |
| ENSG00000187957 | DNER      | Delta/notch like EGF repeat containing                  | 0.042711 |
| ENSG00000117143 | UAP1      | UDP-N-acetylglucosamine pyrophosphorylase 1             | 0.042711 |
| ENSG00000114450 | GNB4      | G protein subunit beta 4                                | 0.043143 |
| ENSG00000181788 | SIAH2     | Siah E3 ubiquitin protein ligase 2                      | 0.043916 |
| ENSG00000173926 | MARCHF3   | Membrane associated ring-CH-type finger 3               | 0.044693 |
| ENSG00000171084 | FAM86JP   | Family with sequence similarity 86 member J, pseudogene | 0.044974 |
| ENSG00000173638 | SLC19A1   | Solute carrier family 19 member 1                       | 0.045964 |
| ENSG00000173898 | SPTBN2    | Spectrin beta, non-erythrocytic 2                       | 0.046283 |
| ENSG00000113460 | BRX1      | Biogenesis of ribosomes BRX1                            | 0.046283 |
| ENSG00000166250 | CLMP      | CXADR like membrane protein                             | 0.046309 |
| ENSG00000185875 | THNSL1    | Threonine synthase like 1                               | 0.046309 |
| ENSG00000186104 | CYP2R1    | Cytochrome P450 family 2 subfamily R member 1           | 0.046329 |
| ENSG00000156502 | SUPV3L1   | Suv3 like RNA helicase                                  | 0.046342 |
| ENSG00000011052 | NME1-NME2 | NME1-NME2 readthrough                                   | 0.046348 |
| ENSG00000119900 | OGFRL1    | Opioid growth factor receptor like 1                    | 0.047101 |
| ENSG00000164122 | ASB5      | Ankyrin repeat and SOCS box containing 5                | 0.047107 |
| ENSG00000176022 | B3GALT6   | Beta-1,3-galactosyltransferase 6                        | 0.04733  |
| ENSG00000035687 | ADSS2     | Adenylosuccinate synthase 2                             | 0.047481 |
| ENSG00000066468 | FGFR2     | Fibroblast growth factor receptor 2                     | 0.047866 |
| ENSG00000273213 | H3-2      | H3.2 histone (putative)                                 | 0.047866 |
| ENSG00000160752 | FDPS      | Farnesyl diphosphate synthase                           | 0.047866 |
| ENSG00000119950 | MXI1      | MAX interactor 1, dimerization protein                  | 0.048368 |
| ENSG00000170468 | RIOX1     | Ribosomal oxygenase 1                                   | 0.048644 |
| ENSG00000197498 | RPF2      | Ribosome production factor 2 homolog                    | 0.049042 |
| ENSG00000105825 | TFPI2     | Tissue factor pathway inhibitor 2                       | 0.049042 |
| ENSG00000121440 | PDZRN3    | PDZ domain containing ring finger 3                     | 0.049401 |
| ENSG00000116106 | EPHA4     | EPH receptor A4                                         | 0.049401 |
| ENSG00000170456 | DENND5B   | DENN domain containing 5B                               | 0.049401 |
| ENSG00000111364 | DDX55     | DEAD-box helicase 55                                    | 0.049401 |
| ENSG00000185730 | ZNF696    | Zinc finger protein 696                                 | 0.049457 |
| ENSG00000171793 | CTPS1     | CTP synthase 1                                          | 0.049457 |
| ENSG00000182985 | CADM1     | Cell adhesion molecule 1                                | 0.049717 |
| ENSG00000168952 | STXBP6    | Syntaxin binding protein 6                              | 0.049821 |

**Supplementary Table S4.** Statistically significant DEGs derived from a meta-analysis comparing DESeq2 outputs from irradiated and control samples of three datasets [PRJNA421022, PRJNA436999, PRJNA494581].

| Ensembl ID                  | Gene Symbol | Gene Description                                                     | Adj. p-Value |
|-----------------------------|-------------|----------------------------------------------------------------------|--------------|
| <b>Up-Regulated Genes ↑</b> |             |                                                                      |              |
| ENSG00000124762             | CDKN1A      | Cyclin dependent kinase inhibitor 1A                                 | 1.24E-108    |
| ENSG00000130513             | GDF15       | Growth differentiation factor 15                                     | 1.07E-38     |
| ENSG00000161513             | FDXR        | Ferredoxin reductase                                                 | 7.72E-33     |
| ENSG00000164938             | TP53INP1    | Tumor protein p53 inducible nuclear protein 1                        | 5.26E-29     |
| ENSG00000120889             | TNFRSF10B   | TNF receptor superfamily member 10b                                  | 1.18E-27     |
| ENSG00000163071             | SPATA18     | Spermatogenesis associated 18                                        | 1.45E-25     |
| ENSG00000055163             | CYFIP2      | Cytoplasmic FMR1 interacting protein 2                               | 1.79E-24     |
| ENSG00000256664             | AC025423.2  | Ribosomal L24 domain containing 1 (RSL24D1) pseudogene               | 5.27E-22     |
| ENSG00000135679             | MDM2        | MDM2 proto-oncogene                                                  | 1.49E-21     |
| ENSG00000109321             | AREG        | Amphiregulin                                                         | 1.86E-21     |
| ENSG00000026103             | FAS         | Fas cell surface death receptor                                      | 1.97E-17     |
| ENSG00000105327             | BBC3        | BCL2 binding component 3                                             | 1.22E-15     |
| ENSG00000173535             | TNFRSF10C   | TNF receptor superfamily member 10c                                  | 5.43E-15     |
| ENSG00000159388             | BTG2        | BTG anti-proliferation factor 2                                      | 6.41E-15     |
| ENSG00000132563             | REEP2       | Receptor accessory protein 2                                         | 6.87E-15     |
| ENSG00000174307             | PHLDA3      | Pleckstrin homology like domain family A member 3                    | 1.47E-14     |
| ENSG00000080546             | SESN1       | Sestrin 1                                                            | 2.06E-13     |
| ENSG00000110900             | TSPAN11     | Tetraspanin 11                                                       | 2.86E-13     |
| ENSG00000181026             | AEN         | Apoptosis enhancing nuclease                                         | 2.08E-12     |
| ENSG00000177076             | ACER2       | Alkaline ceramidase 2                                                | 1.54E-11     |
| ENSG00000134574             | DDB2        | Damage specific DNA binding protein 2                                | 3.93E-11     |
| ENSG00000087088             | BAX         | BCL2 associated X, apoptosis regulator                               | 4.17E-11     |
| ENSG00000244694             | PTCHD4      | Patched domain containing 4                                          | 4.57E-11     |
| ENSG00000143217             | NECTIN4     | Nectin cell adhesion molecule 4                                      | 7.59E-11     |
| ENSG00000177106             | EPS8L2      | EPS8 like 2                                                          | 1.69E-10     |
| ENSG00000154767             | XPC         | XPC complex subunit, DNA damage recognition and repair factor        | 9.08E-10     |
| ENSG00000168918             | INPP5D      | Inositol polyphosphate-5-phosphatase D                               | 1.43E-09     |
| ENSG00000130517             | PGPEP1      | Pyroglutamyl-peptidase I                                             | 2.23E-09     |
| ENSG00000131080             | EDA2R       | Ectodysplasin A2 receptor                                            | 1.96E-08     |
| ENSG00000166592             | RRAD        | RRAD, Ras related glycolysis inhibitor and calcium channel regulator | 2.30E-08     |
| ENSG00000172667             | ZMAT3       | Zinc finger matrin-type 3                                            | 3.68E-08     |
| ENSG00000162490             | DRAXIN      | Dorsal inhibitory axon guidance protein                              | 3.69E-08     |
| ENSG00000162643             | WDR63       | WD repeat domain 63                                                  | 4.68E-08     |
| ENSG00000141232             | TOB1        | Transducer of ERBB2, 1                                               | 4.96E-08     |
| ENSG00000177459             | ERICH5      | Glutamate rich 5                                                     | 5.51E-08     |
| ENSG00000196562             | SULF2       | Sulfatase 2                                                          | 6.51E-08     |
| ENSG00000104870             | FCGRT       | Fc fragment of igg receptor and transporter                          | 6.70E-08     |
| ENSG00000135423             | GLS2        | Glutaminase 2                                                        | 1.10E-07     |
| ENSG00000112249             | ASCC3       | Activating signal cointegrator 1 complex subunit 3                   | 1.22E-07     |
| ENSG00000123933             | MXD4        | MAX dimerization protein 4                                           | 1.25E-07     |
| ENSG00000173530             | TNFRSF10D   | TNF receptor superfamily member 10d                                  | 1.78E-07     |
| ENSG00000167107             | ACSF2       | Acyl-coa synthetase family member 2                                  | 1.84E-07     |



|                 |           |                                                                      |          |
|-----------------|-----------|----------------------------------------------------------------------|----------|
| ENSG00000164463 | CREBRF    | CREB3 regulatory factor                                              | 9.14E-07 |
| ENSG00000068745 | IP6K2     | Inositol hexakisphosphate kinase 2                                   | 1.06E-06 |
| ENSG00000105650 | PDE4C     | Phosphodiesterase 4C                                                 | 1.35E-06 |
| ENSG00000175938 | ORAI3     | ORAI calcium release-activated calcium modulator 3                   | 2.07E-06 |
| ENSG00000137975 | CLCA2     | Chloride channel accessory 2                                         | 3.38E-06 |
| ENSG00000104689 | TNFRSF10A | TNF receptor superfamily member 10a                                  | 4.22E-06 |
| ENSG00000173230 | GOLGB1    | Golgin B1                                                            | 4.41E-06 |
| ENSG00000125746 | EML2      | EMAP like 2                                                          | 4.83E-06 |
| ENSG00000139112 | GABARAPL1 | GABA type A receptor associated protein like 1                       | 7.55E-06 |
| ENSG00000164237 | CMBL      | Carboxymethylenebutenolidase homolog                                 | 1.85E-05 |
| ENSG00000135452 | TSPAN31   | Tetraspanin 31                                                       | 2.16E-05 |
| ENSG00000173846 | PLK3      | Polo like kinase 3                                                   | 3.09E-05 |
| ENSG00000132824 | SERINC3   | Serine incorporator 3                                                | 3.59E-05 |
| ENSG00000185088 | RPS27L    | Ribosomal protein S27 like                                           | 3.88E-05 |
| ENSG00000204219 | TCEA3     | Transcription elongation factor A3                                   | 3.90E-05 |
| ENSG00000042445 | RETSAT    | Retinol saturase                                                     | 3.90E-05 |
| ENSG00000001461 | NIPAL3    | NIPA like domain containing 3                                        | 4.99E-05 |
| ENSG00000196975 | ANXA4     | Annexin A4                                                           | 5.76E-05 |
| ENSG00000198919 | DZIP3     | DAZ interacting zinc finger protein 3                                | 7.37E-05 |
| ENSG00000130703 | OSBPL2    | Oxysterol binding protein like 2                                     | 7.75E-05 |
| ENSG00000196814 | MVB12B    | Multivesicular body subunit 12B                                      | 9.89E-05 |
| ENSG00000010030 | ETV7      | ETS variant transcription factor 7                                   | 0.000112 |
| ENSG00000158055 | GRHL3     | Grainyhead like transcription factor 3                               | 0.000113 |
| ENSG00000105290 | APLP1     | Amyloid beta precursor like protein 1                                | 0.00012  |
| ENSG00000132793 | LPIN3     | Lipin 3                                                              | 0.000134 |
| ENSG00000138166 | DUSP5     | Dual specificity phosphatase 5                                       | 0.000151 |
| ENSG00000244509 | APOBEC3C  | Apolipoprotein B mRNA editing enzyme catalytic subunit 3C            | 0.000165 |
| ENSG00000153029 | MR1       | Major histocompatibility complex, class I-related                    | 0.000166 |
| ENSG00000239713 | APOBEC3G  | Apolipoprotein B mRNA editing enzyme catalytic subunit 3G            | 0.00017  |
| ENSG00000172831 | CES2      | Carboxylesterase 2                                                   | 0.000172 |
| ENSG00000161896 | IP6K3     | Inositol hexakisphosphate kinase 3                                   | 0.000172 |
| ENSG00000119630 | PGF       | Placental growth factor                                              | 0.000179 |
| ENSG00000188554 | NBR1      | NBR1 autophagy cargo receptor                                        | 0.000189 |
| ENSG00000117461 | PIK3R3    | Phosphoinositide-3-kinase regulatory subunit 3                       | 0.00022  |
| ENSG00000148660 | CAMK2G    | Calcium/calmodulin dependent protein kinase II gamma                 | 0.000221 |
| ENSG00000130477 | UNC13A    | Unc-13 homolog A                                                     | 0.000226 |
| ENSG00000132274 | TRIM22    | Tripartite motif containing 22                                       | 0.00023  |
| ENSG00000161835 | GRASP     | General receptor for phosphoinositides 1 associated scaffold protein | 0.000236 |
| ENSG00000169429 | CXCL8     | C-X-C motif chemokine ligand 8                                       | 0.000238 |
| ENSG00000173156 | RHOD      | Ras homolog family member D                                          | 0.000258 |
| ENSG00000047346 | FAM214A   | Family with sequence similarity 214 member A                         | 0.000265 |
| ENSG00000153208 | MERTK     | MER proto-oncogene, tyrosine kinase                                  | 0.00028  |
| ENSG00000116299 | KIAA1324  | Kiaa1324                                                             | 0.000295 |
| ENSG00000163346 | PBXIP1    | PBX homeobox interacting protein 1                                   | 0.000296 |
| ENSG00000149809 | TM7SF2    | Transmembrane 7 superfamily member 2                                 | 0.000299 |
| ENSG00000012822 | CALCOCO1  | Calcium binding and coiled-coil domain 1                             | 0.000304 |
| ENSG00000169760 | NLGN1     | Neuroigin 1                                                          | 0.000322 |
| ENSG00000167861 | HID1      | HID1 domain containing                                               | 0.000352 |

|                 |            |                                                                        |          |
|-----------------|------------|------------------------------------------------------------------------|----------|
| ENSG00000188002 | AC026412.1 | Programmed cell death 6 (PDCD6) pseudogene                             | 0.000444 |
| ENSG00000166887 | VPS39      | VPS39 subunit of HOPS complex                                          | 0.000459 |
| ENSG00000136378 | ADAMTS7    | ADAM metallopeptidase with thrombospondin type 1 motif 7               | 0.000484 |
| ENSG00000060656 | PTPRU      | Protein tyrosine phosphatase receptor type U                           | 0.00051  |
| ENSG00000175155 | YPEL2      | Yippee like 2                                                          | 0.000521 |
| ENSG00000181513 | ACBD4      | Acyl-coa binding domain containing 4                                   | 0.000543 |
| ENSG00000130766 | SESN2      | Sestrin 2                                                              | 0.000573 |
| ENSG00000197093 | GAL3ST4    | Galactose-3-O-sulfotransferase 4                                       | 0.0006   |
| ENSG00000131015 | ULBP2      | UL16 binding protein 2                                                 | 0.000695 |
| ENSG00000137414 | FAM8A1     | Family with sequence similarity 8 member A1                            | 0.000705 |
| ENSG00000138271 | GPR87      | G protein-coupled receptor 87                                          | 0.000705 |
| ENSG00000132906 | CASP9      | Caspase 9                                                              | 0.000746 |
| ENSG00000189195 | BTBD8      | BTB domain containing 8                                                | 0.000798 |
| ENSG00000043143 | JADE2      | Jade family PHD finger 2                                               | 0.000828 |
| ENSG00000185215 | TNFAIP2    | TNF alpha induced protein 2                                            | 0.000839 |
| ENSG00000146411 | SLC2A12    | Solute carrier family 2 member 12                                      | 0.000899 |
| ENSG00000198753 | PLXNB3     | Plexin B3                                                              | 0.000995 |
| ENSG00000232871 | SEC1P      | Secretory blood group 1, pseudogene                                    | 0.000995 |
| ENSG00000167196 | FBXO22     | F-box protein 22                                                       | 0.000997 |
| ENSG00000176907 | TCIM       | Transcriptional and immune response regulator                          | 0.001035 |
| ENSG00000135506 | OS9        | OS9 endoplasmic reticulum lectin                                       | 0.001174 |
| ENSG00000134070 | IRAK2      | Interleukin 1 receptor associated kinase 2                             | 0.001241 |
| ENSG00000144452 | ABCA12     | ATP binding cassette subfamily A member 12                             | 0.001241 |
| ENSG00000160469 | BRSK1      | BR serine/threonine kinase 1                                           | 0.001282 |
| ENSG00000085998 | POMGNT1    | Protein O-linked mannose N-acetylglucosaminyltransferase 1 (beta 1,2-) | 0.001319 |
| ENSG00000156671 | SAMD8      | Sterile alpha motif domain containing 8                                | 0.001324 |
| ENSG00000174684 | B4GAT1     | Beta-1,4-glucuronyltransferase 1                                       | 0.001414 |
| ENSG00000163683 | SMIM14     | Small integral membrane protein 14                                     | 0.00145  |
| ENSG00000142627 | EPHA2      | EPH receptor A2                                                        | 0.001464 |
| ENSG00000048392 | RRM2B      | Ribonucleotide reductase regulatory TP53 inducible subunit M2B         | 0.001513 |
| ENSG00000184205 | TSPYL2     | TSPY like 2                                                            | 0.001563 |
| ENSG00000132879 | FBXO44     | F-box protein 44                                                       | 0.001681 |
| ENSG00000196187 | TMEM63A    | Transmembrane protein 63A                                              | 0.001702 |
| ENSG00000185669 | SNAI3      | Snail family transcriptional repressor 3                               | 0.001744 |
| ENSG00000179163 | FUCA1      | Alpha-L-fucosidase 1                                                   | 0.001923 |
| ENSG00000166233 | ARIH1      | Ariadne RBR E3 ubiquitin protein ligase 1                              | 0.002131 |
| ENSG00000178184 | PARD6G     | Par-6 family cell polarity regulator gamma                             | 0.002273 |
| ENSG00000197496 | SLC2A10    | Solute carrier family 2 member 10                                      | 0.002423 |
| ENSG00000166311 | SMPD1      | Sphingomyelin phosphodiesterase 1                                      | 0.002441 |
| ENSG00000176531 | PHLDB3     | Pleckstrin homology like domain family B member 3                      | 0.002467 |
| ENSG00000109323 | MANBA      | Mannosidase beta                                                       | 0.002517 |
| ENSG00000125538 | IL1B       | Interleukin 1 beta                                                     | 0.002517 |
| ENSG00000115008 | IL1A       | Interleukin 1 alpha                                                    | 0.002599 |
| ENSG00000151117 | TMEM86A    | Transmembrane protein 86A                                              | 0.002599 |
| ENSG00000101298 | SNPH       | Syntaphilin                                                            | 0.002627 |
| ENSG00000170271 | FAXDC2     | Fatty acid hydroxylase domain containing 2                             | 0.002631 |
| ENSG00000157150 | TIMP4      | TIMP metallopeptidase inhibitor 4                                      | 0.002757 |
| ENSG00000165861 | ZFYVE1     | Zinc finger FYVE-type containing 1                                     | 0.002785 |

|                 |            |                                                               |          |
|-----------------|------------|---------------------------------------------------------------|----------|
| ENSG00000021826 | CPS1       | Carbamoyl-phosphate synthase 1                                | 0.002804 |
| ENSG00000188766 | SPRED3     | Sprouty related EVH1 domain containing 3                      | 0.002817 |
| ENSG00000059122 | FLYWCH1    | FLYWCH-type zinc finger 1                                     | 0.002831 |
| ENSG00000138606 | SHF        | Src homology 2 domain containing F                            | 0.002851 |
| ENSG00000135828 | RNASEL     | Ribonuclease L                                                | 0.002908 |
| ENSG00000124098 | FAM210B    | Family with sequence similarity 210 member B                  | 0.002966 |
| ENSG00000148344 | PTGES      | Prostaglandin E synthase                                      | 0.003043 |
| ENSG00000172738 | TMEM217    | Transmembrane protein 217                                     | 0.003065 |
| ENSG00000164331 | ANKRA2     | Ankyrin repeat family A member 2                              | 0.003113 |
| ENSG00000142459 | EVI5L      | Ecotropic viral integration site 5 like                       | 0.003197 |
| ENSG00000137207 | YIPF3      | Yip1 domain family member 3                                   | 0.003408 |
| ENSG00000163703 | CRELD1     | Cysteine rich with EGF like domains 1                         | 0.003548 |
| ENSG00000064687 | ABCA7      | ATP binding cassette subfamily A member 7                     | 0.003625 |
| ENSG00000160460 | AC020929.1 | Spectrin beta, non-erythrocytic 4                             | 0.003738 |
| ENSG00000067369 | TP53BP1    | Tumor protein p53 binding protein 1                           | 0.003938 |
| ENSG00000135709 | KIAA0513   | Kiaa0513                                                      | 0.003938 |
| ENSG00000198722 | UNC13B     | Unc-13 homolog B                                              | 0.004119 |
| ENSG00000084764 | MAPRE3     | Microtubule associated protein RP/EB family member 3          | 0.004163 |
| ENSG00000163947 | ARHGEF3    | Rho guanine nucleotide exchange factor 3                      | 0.004163 |
| ENSG00000142687 | KIAA0319L  | KIAA0319 like                                                 | 0.004222 |
| ENSG00000146278 | PNRC1      | Proline rich nuclear receptor coactivator 1                   | 0.004421 |
| ENSG00000103742 | IGDCC4     | Immunoglobulin superfamily DCC subclass member 4              | 0.004506 |
| ENSG00000056558 | TRAF1      | TNF receptor associated factor 1                              | 0.004527 |
| ENSG00000133460 | SLC2A11    | Solute carrier family 2 member 11                             | 0.004527 |
| ENSG00000196152 | ZNF79      | Zinc finger protein 79                                        | 0.004664 |
| ENSG00000063854 | HAGH       | Hydroxyacylglutathione hydrolase                              | 0.005015 |
| ENSG00000086544 | ITPKC      | Inositol-trisphosphate 3-kinase C                             | 0.005288 |
| ENSG00000078237 | TIGAR      | TP53 induced glycolysis regulatory phosphatase                | 0.005419 |
| ENSG00000139508 | SLC46A3    | Solute carrier family 46 member 3                             | 0.005919 |
| ENSG00000170734 | POLH       | DNA polymerase eta                                            | 0.005974 |
| ENSG00000180155 | LYNX1      | Ly6/neurotoxin 1                                              | 0.006029 |
| ENSG00000105204 | DYRK1B     | Dual specificity tyrosine phosphorylation regulated kinase 1B | 0.006123 |
| ENSG00000173214 | MFS4B      | Major facilitator superfamily domain containing 4B            | 0.006123 |
| ENSG00000118898 | PPL        | Periplakin                                                    | 0.006231 |
| ENSG00000179277 | MEIS3P1    | Meis homeobox 3 pseudogene 1                                  | 0.006423 |
| ENSG00000197429 | IPP        | Intracisternal A particle-promoted polypeptide                | 0.006446 |
| ENSG00000127914 | AKAP9      | A-kinase anchoring protein 9                                  | 0.006666 |
| ENSG00000029534 | ANK1       | Ankyrin 1                                                     | 0.006967 |
| ENSG00000186866 | POFUT2     | Protein O-fucosyltransferase 2                                | 0.007011 |
| ENSG00000260300 |            |                                                               | 0.007032 |
| ENSG00000137880 | GCHFR      | GTP cyclohydrolase I feedback regulator                       | 0.007257 |
| ENSG00000156804 | FBXO32     | F-box protein 32                                              | 0.007462 |
| ENSG00000182580 | EPHB3      | EPH receptor B3                                               | 0.007504 |
| ENSG00000099875 | MKNK2      | MAPK interacting serine/threonine kinase 2                    | 0.008133 |
| ENSG00000158769 | F11R       | F11 receptor                                                  | 0.008233 |
| ENSG00000054148 | PHPT1      | Phosphohistidine phosphatase 1                                | 0.008371 |
| ENSG00000141504 | SAT2       | Spermidine/spermine N1-acetyltransferase family member 2      | 0.00841  |
| ENSG00000143390 | RFX5       | Regulatory factor X5                                          | 0.00841  |
| ENSG00000139266 | MARCHF9    | Membrane associated ring-CH-type finger 9                     | 0.008567 |

|                 |            |                                                                      |          |
|-----------------|------------|----------------------------------------------------------------------|----------|
| ENSG00000181045 | SLC26A11   | Solute carrier family 26 member 11                                   | 0.008812 |
| ENSG00000181754 | AMIGO1     | Adhesion molecule with Ig like domain 1                              | 0.008831 |
| ENSG00000186591 | UBE2H      | Ubiquitin conjugating enzyme E2 H                                    | 0.008957 |
| ENSG00000255112 | CHMP1B     | Charged multivesicular body protein 1B                               | 0.009272 |
| ENSG00000277639 | AC007906.2 | Novel protein                                                        | 0.009577 |
| ENSG00000185339 | TCN2       | Transcobalamin 2                                                     | 0.009642 |
| ENSG00000274180 | NATD1      | N-acetyltransferase domain containing 1                              | 0.01023  |
| ENSG00000088340 | FER1L4     | Fer-1 like family member 4 (pseudogene)                              | 0.010493 |
| ENSG00000034713 | GABARAPL2  | GABA type A receptor associated protein like 2                       | 0.010759 |
| ENSG00000158467 | AHCYL2     | Adenosylhomocysteinase like 2                                        | 0.010975 |
| ENSG00000169902 | TPST1      | Tyrosylprotein sulfotransferase 1                                    | 0.010991 |
| ENSG00000136003 | ISCU       | Iron-sulfur cluster assembly enzyme                                  | 0.01108  |
| ENSG00000128394 | APOBEC3F   | Apolipoprotein B mrna editing enzyme catalytic subunit 3F            | 0.011326 |
| ENSG00000111269 | CREBL2     | Camp responsive element binding protein like 2                       | 0.011329 |
| ENSG00000113319 | RASGRF2    | Ras protein specific guanine nucleotide releasing factor 2           | 0.011676 |
| ENSG00000139182 | CLSTN3     | Calsyntenin 3                                                        | 0.011719 |
| ENSG00000187688 | TRPV2      | Transient receptor potential cation channel subfamily V member 2     | 0.012032 |
| ENSG00000168216 | LMBRD1     | LMBR1 domain containing 1                                            | 0.012324 |
| ENSG00000012171 | SEMA3B     | Semaphorin 3B                                                        | 0.012916 |
| ENSG00000140463 | BBS4       | Bardet-Biedl syndrome 4                                              | 0.012929 |
| ENSG00000076641 | PAG1       | Phosphoprotein membrane anchor with glycosphingolipid microdomains 1 | 0.01297  |
| ENSG00000117533 | VAMP4      | Vesicle associated membrane protein 4                                | 0.013104 |
| ENSG00000160539 | PLPP7      | Phospholipid phosphatase 7 (inactive)                                | 0.013293 |
| ENSG00000237094 | AL732372.2 | Pseudogene similar to part of septin 14 SEPT14                       | 0.013765 |
| ENSG00000175854 | SWI5       | SWI5 homologous recombination repair protein                         | 0.013831 |
| ENSG00000112343 | TRIM38     | Tripartite motif containing 38                                       | 0.013936 |
| ENSG00000173193 | PARP14     | Poly(ADP-ribose) polymerase family member 14                         | 0.013936 |
| ENSG00000157954 | WIPI2      | WD repeat domain, phosphoinositide interacting 2                     | 0.014002 |
| ENSG00000100100 | PIK3IP1    | Phosphoinositide-3-kinase interacting protein 1                      | 0.014107 |
| ENSG00000166816 | LDHD       | Lactate dehydrogenase D                                              | 0.014434 |
| ENSG00000136874 | STX17      | Syntaxin 17                                                          | 0.014483 |
| ENSG00000119508 | NR4A3      | Nuclear receptor subfamily 4 group A member 3                        | 0.014559 |
| ENSG00000011243 | AKAP8L     | A-kinase anchoring protein 8 like                                    | 0.014597 |
| ENSG00000197892 | KIF13B     | Kinesin family member 13B                                            | 0.014938 |
| ENSG00000163956 | LRPAP1     | LDL receptor related protein associated protein 1                    | 0.015172 |
| ENSG00000184588 | PDE4B      | Phosphodiesterase 4B                                                 | 0.015719 |
| ENSG00000105649 | RAB3A      | RAB3A, member RAS oncogene family                                    | 0.015913 |
| ENSG00000136928 | GABBR2     | Gamma-aminobutyric acid type B receptor subunit 2                    | 0.015976 |
| ENSG00000087085 | ACHE       | Acetylcholinesterase (Cartwright blood group)                        | 0.016047 |
| ENSG00000103021 | CCDC113    | Coiled-coil domain containing 113                                    | 0.016057 |
| ENSG00000132256 | TRIM5      | Tripartite motif containing 5                                        | 0.01666  |
| ENSG00000119899 | SLC17A5    | Solute carrier family 17 member 5                                    | 0.01685  |
| ENSG00000137103 | TMEM8B     | Transmembrane protein 8B                                             | 0.017031 |
| ENSG00000065357 | DGKA       | Diacylglycerol kinase alpha                                          | 0.017314 |
| ENSG00000186642 | PDE2A      | Phosphodiesterase 2A                                                 | 0.017314 |
| ENSG00000213463 | SYNJ2BP    | Synaptojanin 2 binding protein                                       | 0.017466 |
| ENSG00000283050 | GTF2IP12   | General transcription factor iii pseudogene 12                       | 0.018207 |
| ENSG00000100577 | GSTZ1      | Glutathione S-transferase zeta 1                                     | 0.018272 |

|                 |            |                                                                              |          |
|-----------------|------------|------------------------------------------------------------------------------|----------|
| ENSG00000121310 | ECHDC2     | Enoyl-coa hydratase domain containing 2                                      | 0.018318 |
| ENSG00000149577 | SIDT2      | SID1 transmembrane family member 2                                           | 0.018318 |
| ENSG00000148541 | FAM13C     | Family with sequence similarity 13 member C                                  | 0.01862  |
| ENSG00000175793 | SFN        | Stratifin                                                                    | 0.019005 |
| ENSG00000170855 | TRIAP1     | TP53 regulated inhibitor of apoptosis 1                                      | 0.019174 |
| ENSG00000173992 | CCS        | Copper chaperone for superoxide dismutase                                    | 0.019205 |
| ENSG00000161544 | CYGB       | Cytoglobin                                                                   | 0.019473 |
| ENSG00000168300 | PCMTD1     | Protein-L-isoaspartate (D-aspartate) O-methyltransferase domain containing 1 | 0.019636 |
| ENSG00000178607 | ERN1       | Endoplasmic reticulum to nucleus signaling 1                                 | 0.019691 |
| ENSG00000166145 | SPINT1     | Serine peptidase inhibitor, Kunitz type 1                                    | 0.020192 |
| ENSG00000243749 | TMEM35B    | Transmembrane protein 35B                                                    | 0.020192 |
| ENSG00000129472 | RAB2B      | RAB2B, member RAS oncogene family                                            | 0.020472 |
| ENSG00000121743 | GJA3       | Gap junction protein alpha 3                                                 | 0.021079 |
| ENSG00000124067 | SLC12A4    | Solute carrier family 12 member 4                                            | 0.021132 |
| ENSG00000197302 | ZNF720     | Zinc finger protein 720                                                      | 0.021656 |
| ENSG00000115129 | TP53I3     | Tumor protein p53 inducible protein 3                                        | 0.021687 |
| ENSG00000116209 | TMEM59     | Transmembrane protein 59                                                     | 0.022305 |
| ENSG00000089847 | ANKRD24    | Ankyrin repeat domain 24                                                     | 0.022555 |
| ENSG00000131386 | GALNT15    | Polypeptide N-acetylgalactosaminyltransferase 15                             | 0.02256  |
| ENSG00000025434 | NR1H3      | Nuclear receptor subfamily 1 group H member 3                                | 0.022759 |
| ENSG00000076344 | RGS11      | Regulator of G protein signaling 11                                          | 0.022809 |
| ENSG00000213930 | GALT       | Galactose-1-phosphate uridylyltransferase                                    | 0.023225 |
| ENSG00000137145 | DENND4C    | DENN domain containing 4C                                                    | 0.023499 |
| ENSG00000100647 | SUSD6      | Sushi domain containing 6                                                    | 0.024199 |
| ENSG00000135823 | STX6       | Syntaxin 6                                                                   | 0.024199 |
| ENSG00000143409 | MINDY1     | MINDY lysine 48 deubiquitinase 1                                             | 0.024199 |
| ENSG00000109103 | UNC119     | Unc-119 lipid binding chaperone                                              | 0.024368 |
| ENSG00000138641 | HERC3      | HECT and RLD domain containing E3 ubiquitin protein ligase 3                 | 0.025289 |
| ENSG00000172508 | CARNS1     | Carnosine synthase 1                                                         | 0.025289 |
| ENSG00000168890 | TMEM150A   | Transmembrane protein 150A                                                   | 0.025662 |
| ENSG00000124406 | ATP8A1     | Atpase phospholipid transporting 8A1                                         | 0.025871 |
| ENSG00000170581 | STAT2      | Signal transducer and activator of transcription 2                           | 0.026216 |
| ENSG00000173221 | GLRX       | Glutaredoxin                                                                 | 0.026216 |
| ENSG00000165475 | CRYL1      | Crystallin lambda 1                                                          | 0.026375 |
| ENSG00000142961 | MOB3C      | MOB kinase activator 3C                                                      | 0.026764 |
| ENSG00000114626 | ABTB1      | Ankyrin repeat and BTB domain containing 1                                   | 0.027893 |
| ENSG00000136859 | ANGPTL2    | Angiopoietin like 2                                                          | 0.027893 |
| ENSG00000169242 | EFNA1      | Ephrin A1                                                                    | 0.027893 |
| ENSG00000121671 | CRY2       | Cryptochrome circadian regulator 2                                           | 0.028045 |
| ENSG00000166313 | APBB1      | Amyloid beta precursor protein binding family B member 1                     | 0.028045 |
| ENSG00000171219 | CDC42BPG   | CDC42 binding protein kinase gamma                                           | 0.028222 |
| ENSG00000137216 | TMEM63B    | Transmembrane protein 63B                                                    | 0.028398 |
| ENSG00000169621 | APLF       | Aprataxin and PNKP like factor                                               | 0.028923 |
| ENSG00000285188 | AC008397.2 | Camp-specific 3',5'-cyclic phosphodiesterase 4C                              | 0.028923 |
| ENSG00000233369 | GTF2IP4    | General transcription factor iii pseudogene 4                                | 0.029097 |
| ENSG00000105967 | TFEC       | Transcription factor EC                                                      | 0.029244 |
| ENSG00000178038 | ALS2CL     | ALS2 C-terminal like                                                         | 0.02939  |
| ENSG00000180104 | EXOC3      | Exocyst complex component 3                                                  | 0.029588 |

|                 |            |                                                                      |          |
|-----------------|------------|----------------------------------------------------------------------|----------|
| ENSG00000275066 | SYNRG      | Synerglin gamma                                                      | 0.029759 |
| ENSG00000004799 | PDK4       | Pyruvate dehydrogenase kinase 4                                      | 0.030153 |
| ENSG00000114796 | KLHL24     | Kelch like family member 24                                          | 0.030153 |
| ENSG00000159214 | CCDC24     | Coiled-coil domain containing 24                                     | 0.030349 |
| ENSG00000170836 | PPM1D      | Protein phosphatase, Mg <sup>2+</sup> /Mn <sup>2+</sup> dependent 1D | 0.030545 |
| ENSG00000095970 | TREM2      | Triggering receptor expressed on myeloid cells 2                     | 0.030687 |
| ENSG00000120709 | FAM53C     | Family with sequence similarity 53 member C                          | 0.031243 |
| ENSG00000166046 | TCP11L2    | T-complex 11 like 2                                                  | 0.031243 |
| ENSG00000006282 | SPATA20    | Spermatogenesis associated 20                                        | 0.031382 |
| ENSG00000132510 | KDM6B      | Lysine demethylase 6B                                                | 0.031382 |
| ENSG00000077150 | NFKB2      | Nuclear factor kappa B subunit 2                                     | 0.031713 |
| ENSG00000103485 | QPRT       | Quinolate phosphoribosyltransferase                                  | 0.031822 |
| ENSG00000165272 | AQP3       | Aquaporin 3 (Gill blood group)                                       | 0.031822 |
| ENSG00000250770 | AC005865.1 | Tetraspanin 11 (TSPAN11) pseudogene                                  | 0.031822 |
| ENSG00000189241 | TSPYL1     | TSPY like 1                                                          | 0.032148 |
| ENSG00000146232 | NFKBIE     | NFKB inhibitor epsilon                                               | 0.032473 |
| ENSG00000070540 | WIPI1      | WD repeat domain, phosphoinositide interacting 1                     | 0.03288  |
| ENSG00000167703 | SLC43A2    | Solute carrier family 43 member 2                                    | 0.033852 |
| ENSG00000132623 | ANKF1      | Ankyrin repeat and EF-hand domain containing 1                       | 0.03404  |
| ENSG00000113328 | CCNG1      | Cyclin G1                                                            | 0.034444 |
| ENSG00000231551 | AC245100.4 | Phosphodiesterase 4D interacting protein (PDE4DIP) pseudogene        | 0.034817 |
| ENSG00000135525 | MAP7       | Microtubule associated protein 7                                     | 0.035159 |
| ENSG00000240771 | ARHGEF25   | Rho guanine nucleotide exchange factor 25                            | 0.035159 |
| ENSG00000206561 | COLQ       | Collagen like tail subunit of asymmetric acetylcholinesterase        | 0.035684 |
| ENSG00000068912 | ERLEC1     | Endoplasmic reticulum lectin 1                                       | 0.036298 |
| ENSG00000136114 | THSD1      | Thrombospondin type 1 domain containing 1                            | 0.036754 |
| ENSG00000130363 | RSPH3      | Radial spoke head 3                                                  | 0.036873 |
| ENSG00000249624 | AP000295.1 | Novel protein                                                        | 0.036873 |
| ENSG00000117305 | HMGCL      | 3-hydroxy-3-methylglutaryl-coa lyase                                 | 0.037472 |
| ENSG00000027869 | SH2D2A     | SH2 domain containing 2A                                             | 0.037495 |
| ENSG00000265808 | SEC22B     | SEC22 homolog B, vesicle trafficking protein (gene/pseudogene)       | 0.037495 |
| ENSG00000164088 | PPM1M      | Protein phosphatase, Mg <sup>2+</sup> /Mn <sup>2+</sup> dependent 1M | 0.037611 |
| ENSG00000163449 | TMEM169    | Transmembrane protein 169                                            | 0.037789 |
| ENSG00000006283 | CACNA1G    | Calcium voltage-gated channel subunit alpha1 G                       | 0.037905 |
| ENSG00000106992 | AK1        | Adenylate kinase 1                                                   | 0.037905 |
| ENSG00000102981 | PARD6A     | Par-6 family cell polarity regulator alpha                           | 0.038019 |
| ENSG00000111540 | RAB5B      | RAB5B, member RAS oncogene family                                    | 0.038019 |
| ENSG00000105514 | RAB3D      | RAB3D, member RAS oncogene family                                    | 0.038133 |
| ENSG00000179941 | BBS10      | Bardet-Biedl syndrome 10                                             | 0.038133 |
| ENSG00000138036 | DYNC2LI1   | Dynein cytoplasmic 2 light intermediate chain 1                      | 0.038215 |
| ENSG00000141295 | SCRN2      | Secernin 2                                                           | 0.038215 |
| ENSG00000095066 | HOOK2      | Hook microtubule tethering protein 2                                 | 0.038853 |
| ENSG00000163659 | TIPARP     | TCDD inducible poly(ADP-ribose) polymerase                           | 0.038853 |
| ENSG00000167971 | CASKIN1    | CASK interacting protein 1                                           | 0.038996 |
| ENSG00000155957 | TMBIM4     | Transmembrane BAX inhibitor motif containing 4                       | 0.03917  |
| ENSG00000161509 | GRIN2C     | Glutamate ionotropic receptor NMDA type subunit 2C                   | 0.039518 |
| ENSG00000186814 | ZSCAN30    | Zinc finger and SCAN domain containing 30                            | 0.039518 |
| ENSG00000158604 | TMED4      | Transmembrane p24 trafficking protein 4                              | 0.039659 |

|                              |            |                                                                            |          |
|------------------------------|------------|----------------------------------------------------------------------------|----------|
| ENSG00000128604              | IRF5       | Interferon regulatory factor 5                                             | 0.040004 |
| ENSG00000111275              | ALDH2      | Aldehyde dehydrogenase 2 family member                                     | 0.040455 |
| ENSG00000128268              | MGAT3      | Beta-1,4-mannosyl-glycoprotein 4-beta-N-acetylglucosaminyltransferase      | 0.040455 |
| ENSG00000132471              | WBP2       | WW domain binding protein 2                                                | 0.041276 |
| ENSG00000132849              | PATJ       | PATJ crumbs cell polarity complex component                                | 0.041276 |
| ENSG00000092758              | COL9A3     | Collagen type IX alpha 3 chain                                             | 0.041615 |
| ENSG00000285976              | AL135905.2 | Novel protein                                                              | 0.041751 |
| ENSG00000171174              | RBKS       | Ribokinase                                                                 | 0.041852 |
| ENSG00000130244              | FAM98C     | Family with sequence similarity 98 member C                                | 0.041987 |
| ENSG00000138642              | HERC6      | HECT and RLD domain containing E3 ubiquitin protein ligase family member 6 | 0.041987 |
| ENSG00000135414              | GDF11      | Growth differentiation factor 11                                           | 0.042155 |
| ENSG00000090238              | YPEL3      | Yippee like 3                                                              | 0.042589 |
| ENSG00000126709              | IFI6       | Interferon alpha inducible protein 6                                       | 0.042589 |
| ENSG00000213918              | DNASE1     | Deoxyribonuclease 1                                                        | 0.044011 |
| ENSG00000173918              | C1QTNF1    | C1q and TNF related 1                                                      | 0.044175 |
| ENSG00000171236              | LRG1       | Leucine rich alpha-2-glycoprotein 1                                        | 0.044503 |
| ENSG00000198208              | RPS6KL1    | Ribosomal protein S6 kinase like 1                                         | 0.044666 |
| ENSG00000167642              | SPINT2     | Serine peptidase inhibitor, Kunitz type 2                                  | 0.044957 |
| ENSG00000171408              | PDE7B      | Phosphodiesterase 7B                                                       | 0.046018 |
| ENSG00000167986              | DDB1       | Damage specific DNA binding protein 1                                      | 0.04639  |
| ENSG00000185133              | INPP5J     | Inositol polyphosphate-5-phosphatase J                                     | 0.04639  |
| ENSG00000225511              | LINC00475  | Long intergenic non-protein coding RNA 475                                 | 0.04639  |
| ENSG00000182473              | EXOC7      | Exocyst complex component 7                                                | 0.046477 |
| ENSG00000026950              | BTN3A1     | Butyrophilin subfamily 3 member A1                                         | 0.0466   |
| ENSG00000127125              | PPCS       | Phosphopantothenoylcysteine synthetase                                     | 0.046918 |
| ENSG00000100731              | PCNX1      | Pecanex 1                                                                  | 0.047392 |
| ENSG00000107537              | PHYH       | Phytanoyl-coa 2-hydroxylase                                                | 0.04767  |
| ENSG00000141376              | BCAS3      | BCAS3 microtubule associated cell migration factor                         | 0.04767  |
| ENSG00000197872              | FAM49A     | Family with sequence similarity 49 member A                                | 0.047827 |
| ENSG00000108306              | FBXL20     | F-box and leucine rich repeat protein 20                                   | 0.048222 |
| ENSG00000186994              | KANK3      | KN motif and ankyrin repeat domains 3                                      | 0.048222 |
| ENSG00000088726              | TMEM40     | Transmembrane protein 40                                                   | 0.048341 |
| ENSG00000116183              | PAPPA2     | Pappalysin 2                                                               | 0.048341 |
| ENSG00000170634              | ACYP2      | Acyolphosphatase 2                                                         | 0.048652 |
| ENSG00000239382              | ALKBH6     | Alkb homolog 6                                                             | 0.048807 |
| ENSG00000116017              | ARID3A     | AT-rich interaction domain 3A                                              | 0.049079 |
| ENSG00000089486              | CDIP1      | Cell death inducing p53 target 1                                           | 0.049312 |
| ENSG00000167676              | PLIN4      | Perilipin 4                                                                | 0.049312 |
| ENSG00000184117              | NIPSNAP1   | Nipsnap homolog 1                                                          | 0.049312 |
| ENSG00000250510              | GPR162     | G protein-coupled receptor 162                                             | 0.049772 |
| <b>Down-Regulated Genes↓</b> |            |                                                                            |          |
| ENSG00000171848              | RRM2       | Ribonucleotide reductase regulatory subunit M2                             | 2.30E-94 |
| ENSG00000148773              | MKI67      | Marker of proliferation Ki-67                                              | 7.25E-89 |
| ENSG00000189057              | FAM111B    | Family with sequence similarity 111 member B                               | 2.04E-78 |
| ENSG00000145386              | CCNA2      | Cyclin A2                                                                  | 7.75E-75 |
| ENSG00000101057              | MYBL2      | MYB proto-oncogene like 2                                                  | 2.95E-69 |
| ENSG00000203811              | H3C14      | H3 clustered histone 14                                                    | 6.26E-67 |
| ENSG00000174371              | EXO1       | Exonuclease 1                                                              | 6.70E-65 |
| ENSG00000166851              | PLK1       | Polo like kinase 1                                                         | 1.01E-64 |

|                 |          |                                                             |          |
|-----------------|----------|-------------------------------------------------------------|----------|
| ENSG00000094804 | CDC6     | Cell division cycle 6                                       | 3.12E-61 |
| ENSG00000286522 | H3C2     | H3 clustered histone 2                                      | 1.17E-60 |
| ENSG00000170312 | CDK1     | Cyclin dependent kinase 1                                   | 1.94E-60 |
| ENSG00000143476 | DTL      | Denticleless E3 ubiquitin protein ligase homolog            | 7.63E-54 |
| ENSG00000134690 | CDCA8    | Cell division cycle associated 8                            | 2.75E-53 |
| ENSG00000184357 | H1-5     | H1.5 linker histone, cluster member                         | 2.63E-52 |
| ENSG00000088325 | TPX2     | TPX2 microtubule nucleation factor                          | 5.98E-51 |
| ENSG00000121152 | NCAPH    | Non-SMC condensin I complex subunit H                       | 2.44E-50 |
| ENSG00000146670 | CDCA5    | Cell division cycle associated 5                            | 2.67E-49 |
| ENSG00000109805 | NCAPG    | Non-SMC condensin I complex subunit G                       | 7.17E-49 |
| ENSG00000105011 | ASF1B    | Anti-silencing function 1B histone chaperone                | 1.12E-48 |
| ENSG00000183856 | IQGAP3   | IQ motif containing gtpase activating protein 3             | 1.93E-47 |
| ENSG00000123485 | HJURP    | Holliday junction recognition protein                       | 4.30E-47 |
| ENSG00000101447 | FAM83D   | Family with sequence similarity 83 member D                 | 1.08E-45 |
| ENSG00000126787 | DLGAP5   | DLG associated protein 5                                    | 1.41E-45 |
| ENSG00000111665 | CDCA3    | Cell division cycle associated 3                            | 1.98E-45 |
| ENSG00000175305 | CCNE2    | Cyclin E2                                                   | 1.75E-43 |
| ENSG00000093009 | CDC45    | Cell division cycle 45                                      | 6.26E-43 |
| ENSG00000168078 | PBK      | PDZ binding kinase                                          | 6.94E-43 |
| ENSG00000138180 | CEP55    | Centrosomal protein 55                                      | 7.27E-43 |
| ENSG00000065328 | MCM10    | Minichromosome maintenance 10 replication initiation factor | 2.68E-42 |
| ENSG00000178999 | AURKB    | Aurora kinase B                                             | 1.54E-40 |
| ENSG00000198901 | PRC1     | Protein regulator of cytokinesis 1                          | 7.13E-39 |
| ENSG00000122952 | ZWINT    | ZW10 interacting kinetochore protein                        | 9.99E-39 |
| ENSG00000186185 | KIF18B   | Kinesin family member 18B                                   | 1.68E-38 |
| ENSG00000169607 | CKAP2L   | Cytoskeleton associated protein 2 like                      | 2.20E-38 |
| ENSG00000168496 | FEN1     | Flap structure-specific endonuclease 1                      | 4.87E-38 |
| ENSG00000276043 | UHRF1    | Ubiquitin like with PHD and ring finger domains 1           | 6.49E-38 |
| ENSG00000111206 | FOXM1    | Forkhead box M1                                             | 1.52E-37 |
| ENSG00000165304 | MELK     | Maternal embryonic leucine zipper kinase                    | 2.45E-37 |
| ENSG00000167900 | TK1      | Thymidine kinase 1                                          | 5.48E-37 |
| ENSG00000197153 | H3C12    | H3 clustered histone 12                                     | 9.95E-37 |
| ENSG00000092853 | CLSPN    | Claspin                                                     | 1.51E-36 |
| ENSG00000165480 | SKA3     | Spindle and kinetochore associated complex subunit 3        | 3.55E-36 |
| ENSG00000112742 | TTK      | TTK protein kinase                                          | 3.72E-36 |
| ENSG00000127564 | PKMYT1   | Protein kinase, membrane associated tyrosine/threonine 1    | 6.84E-36 |
| ENSG00000188486 | H2AX     | H2A.X variant histone                                       | 1.31E-35 |
| ENSG00000100297 | MCM5     | Minichromosome maintenance complex component 5              | 1.60E-35 |
| ENSG00000137804 | NUSAP1   | Nucleolar and spindle associated protein 1                  | 5.45E-35 |
| ENSG00000167513 | CDT1     | Chromatin licensing and DNA replication factor 1            | 8.21E-35 |
| ENSG00000131153 | GINS2    | GINS complex subunit 2                                      | 1.20E-34 |
| ENSG00000085840 | ORC1     | Origin recognition complex subunit 1                        | 2.05E-34 |
| ENSG00000111247 | RAD51AP1 | RAD51 associated protein 1                                  | 3.36E-34 |
| ENSG00000071539 | TRIP13   | Thyroid hormone receptor interactor 13                      | 3.41E-34 |
| ENSG00000161888 | SPC24    | SPC24 component of NDC80 kinetochore complex                | 9.15E-34 |
| ENSG00000075218 | GTSE1    | G2 and S-phase expressed 1                                  | 5.62E-33 |
| ENSG00000166803 | PCLAF    | PCNA clamp associated factor                                | 6.45E-33 |
| ENSG00000161800 | RACGAP1  | Rac gtpase activating protein 1                             | 6.99E-33 |
| ENSG00000274997 | H2AC12   | H2A clustered histone 12                                    | 8.31E-33 |
| ENSG00000144354 | CDCA7    | Cell division cycle associated 7                            | 9.53E-33 |



|                 |            |                                                                   |          |
|-----------------|------------|-------------------------------------------------------------------|----------|
| ENSG00000112029 | FBXO5      | F-box protein 5                                                   | 2.47E-32 |
| ENSG00000164104 | HMGB2      | High mobility group box 2                                         | 2.97E-32 |
| ENSG00000198826 | ARHGAP11A  | Rho gtpase activating protein 11A                                 | 7.04E-32 |
| ENSG00000138160 | KIF11      | Kinesin family member 11                                          | 8.98E-32 |
| ENSG00000011426 | ANLN       | Anillin actin binding protein                                     | 1.66E-31 |
| ENSG00000092470 | WDR76      | WD repeat domain 76                                               | 1.98E-31 |
| ENSG00000073111 | MCM2       | Minichromosome maintenance complex component 2                    | 2.34E-31 |
| ENSG00000024526 | DEPDC1     | DEP domain containing 1                                           | 7.22E-31 |
| ENSG00000113368 | LMNB1      | Lamin B1                                                          | 7.23E-31 |
| ENSG00000186871 | ERCC6L     | ERCC excision repair 6 like, spindle assembly checkpoint helicase | 1.41E-30 |
| ENSG00000007968 | E2F2       | E2F transcription factor 2                                        | 1.76E-30 |
| ENSG00000142945 | KIF2C      | Kinesin family member 2C                                          | 1.88E-30 |
| ENSG00000196747 | H2AC13     | H2A clustered histone 13                                          | 5.84E-30 |
| ENSG00000278463 | H2AC4      | H2A clustered histone 4                                           | 5.84E-30 |
| ENSG00000112984 | KIF20A     | Kinesin family member 20A                                         | 1.24E-29 |
| ENSG00000276903 | H2AC16     | H2A clustered histone 16                                          | 2.43E-29 |
| ENSG00000175063 | UBE2C      | Ubiquitin conjugating enzyme E2 C                                 | 2.45E-29 |
| ENSG00000276368 | H2AC14     | H2A clustered histone 14                                          | 1.07E-28 |
| ENSG00000277075 | H2AC8      | H2A clustered histone 8                                           | 2.14E-28 |
| ENSG00000119969 | HELLS      | Helicase, lymphoid specific                                       | 4.73E-28 |
| ENSG00000122966 | CIT        | Citron rho-interacting serine/threonine kinase                    | 5.85E-28 |
| ENSG00000274641 | H2BC17     | H2B clustered histone 17                                          | 6.07E-28 |
| ENSG00000171241 | SHCBP1     | SHC binding and spindle associated 1                              | 6.07E-28 |
| ENSG00000131747 | TOP2A      | DNA topoisomerase II alpha                                        | 8.14E-28 |
| ENSG00000143228 | NUF2       | NUF2 component of NDC80 kinetochore complex                       | 3.49E-27 |
| ENSG00000166508 | MCM7       | Minichromosome maintenance complex component 7                    | 4.07E-27 |
| ENSG00000278677 | H2AC17     | H2A clustered histone 17                                          | 4.45E-27 |
| ENSG00000101412 | E2F1       | E2F transcription factor 1                                        | 2.24E-26 |
| ENSG00000196787 | H2AC11     | H2A clustered histone 11                                          | 3.45E-26 |
| ENSG00000137807 | KIF23      | Kinesin family member 23                                          | 3.84E-26 |
| ENSG00000138778 | CENPE      | Centromere protein E                                              | 5.78E-26 |
| ENSG00000013810 | TACC3      | Transforming acidic coiled-coil containing protein 3              | 1.41E-25 |
| ENSG00000068489 | PRR11      | Proline rich 11                                                   | 1.68E-25 |
| ENSG00000183598 | H3C13      | H3 clustered histone 13                                           | 3.24E-25 |
| ENSG00000101003 | GIN51      | GIN5 complex subunit 1                                            | 3.66E-25 |
| ENSG00000282988 | AL031777.2 | Novel protein                                                     | 5.24E-25 |
| ENSG00000156970 | BUB1B      | BUB1 mitotic checkpoint serine/threonine kinase B                 | 1.05E-24 |
| ENSG00000151725 | CENPU      | Centromere protein U                                              | 1.55E-24 |
| ENSG00000171320 | ESCO2      | Establishment of sister chromatid cohesion N-acetyltransferase 2  | 2.27E-24 |
| ENSG00000162073 | PAQR4      | Progesterin and adipopo receptor family member 4                  | 2.80E-24 |
| ENSG00000165490 | DDIAS      | DNA damage induced apoptosis suppressor                           | 2.99E-24 |
| ENSG00000169679 | BUB1       | BUB1 mitotic checkpoint serine/threonine kinase                   | 3.74E-24 |
| ENSG00000144554 | FANCD2     | FA complementation group D2                                       | 5.20E-24 |
| ENSG00000186193 | SAPCD2     | Suppressor APC domain containing 2                                | 6.28E-24 |
| ENSG00000117650 | NEK2       | NIMA related kinase 2                                             | 1.26E-23 |
| ENSG00000120802 | TMPO       | Thymopoietin                                                      | 1.64E-23 |
| ENSG00000164109 | MAD2L1     | Mitotic arrest deficient 2 like 1                                 | 2.63E-23 |
| ENSG00000167670 | CHAF1A     | Chromatin assembly factor 1 subunit A                             | 5.68E-23 |
| ENSG00000112118 | MCM3       | Minichromosome maintenance complex component 3                    | 6.03E-23 |

|                 |          |                                                         |          |
|-----------------|----------|---------------------------------------------------------|----------|
| ENSG0000051180  | RAD51    | RAD51 recombinase                                       | 2.39E-22 |
| ENSG00000159259 | CHAF1B   | Chromatin assembly factor 1 subunit B                   | 2.60E-22 |
| ENSG00000134057 | CCNB1    | Cyclin B1                                               | 2.75E-22 |
| ENSG00000077152 | UBE2T    | Ubiquitin conjugating enzyme E2 T                       | 4.31E-22 |
| ENSG00000129195 | PIMREG   | PICALM interacting mitotic regulator                    | 8.03E-22 |
| ENSG00000168298 | H1-4     | H1.4 linker histone, cluster member                     | 8.99E-22 |
| ENSG00000133119 | RFC3     | Replication factor C subunit 3                          | 1.12E-21 |
| ENSG00000090889 | KIF4A    | Kinesin family member 4A                                | 1.58E-21 |
| ENSG00000165244 | ZNF367   | Zinc finger protein 367                                 | 3.38E-21 |
| ENSG00000100162 | CENPM    | Centromere protein M                                    | 3.45E-21 |
| ENSG00000187741 | FANCA    | FA complementation group A                              | 3.48E-21 |
| ENSG00000117399 | CDC20    | Cell division cycle 20                                  | 3.77E-21 |
| ENSG00000160957 | RECQL4   | Recq like helicase 4                                    | 3.89E-21 |
| ENSG00000066279 | ASPM     | Abnormal spindle microtubule assembly                   | 4.69E-21 |
| ENSG00000162063 | CCNF     | Cyclin F                                                | 4.71E-21 |
| ENSG00000076003 | MCM6     | Minichromosome maintenance complex component 6          | 7.70E-21 |
| ENSG00000142731 | PLK4     | Polo like kinase 4                                      | 1.03E-20 |
| ENSG00000185130 | H2BC13   | H2B clustered histone 13                                | 1.15E-20 |
| ENSG00000136982 | DSCC1    | DNA replication and sister chromatid cohesion 1         | 1.50E-20 |
| ENSG00000101868 | POLA1    | DNA polymerase alpha 1, catalytic subunit               | 1.54E-20 |
| ENSG00000146918 | NCAPG2   | Non-SMC condensin II complex subunit G2                 | 2.66E-20 |
| ENSG00000117724 | CENPF    | Centromere protein F                                    | 2.84E-20 |
| ENSG00000135451 | TROAP    | Trophinin associated protein                            | 3.97E-20 |
| ENSG00000014138 | POLA2    | DNA polymerase alpha 2, accessory subunit               | 9.02E-20 |
| ENSG00000124635 | H2BC11   | H2B clustered histone 11                                | 1.12E-19 |
| ENSG00000170779 | CDCA4    | Cell division cycle associated 4                        | 1.23E-19 |
| ENSG00000164087 | POC1A    | POC1 centriolar protein A                               | 1.54E-19 |
| ENSG00000177602 | HASPIN   | Histone H3 associated protein kinase                    | 2.14E-19 |
| ENSG00000123219 | CENPK    | Centromere protein K                                    | 3.12E-19 |
| ENSG00000277157 | H4C4     | H4 clustered histone 4                                  | 6.95E-19 |
| ENSG00000140534 | TICRR    | TOPBP1 interacting checkpoint and replication regulator | 7.84E-19 |
| ENSG00000183688 | RFLNB    | Refilin B                                               | 8.48E-19 |
| ENSG00000124575 | H1-3     | H1.3 linker histone, cluster member                     | 1.25E-18 |
| ENSG00000213347 | MXD3     | MAX dimerization protein 3                              | 1.28E-18 |
| ENSG00000080986 | NDC80    | NDC80 kinetochore complex component                     | 1.35E-18 |
| ENSG00000270882 | H4C14    | H4 clustered histone 14                                 | 1.91E-18 |
| ENSG00000164611 | PTTG1    | PTTG1 regulator of sister chromatid separation, securin | 2.39E-18 |
| ENSG00000107562 | CXCL12   | C-X-C motif chemokine ligand 12                         | 3.10E-18 |
| ENSG00000187837 | H1-2     | H1.2 linker histone, cluster member                     | 3.36E-18 |
| ENSG00000135476 | ESPL1    | Extra spindle pole bodies like 1, separase              | 4.99E-18 |
| ENSG00000089685 | BIRC5    | Baculoviral IAP repeat containing 5                     | 5.82E-18 |
| ENSG00000131470 | PSMC3IP  | PSMC3 interacting protein                               | 7.30E-18 |
| ENSG00000228716 | DHFR     | Dihydrofolate reductase                                 | 8.64E-18 |
| ENSG00000157456 | CCNB2    | Cyclin B2                                               | 9.65E-18 |
| ENSG00000129810 | SGO1     | Shugoshin 1                                             | 1.06E-17 |
| ENSG00000167325 | RRM1     | Ribonucleotide reductase catalytic subunit M1           | 1.59E-17 |
| ENSG00000176890 | TYMS     | Thymidylate synthetase                                  | 1.72E-17 |
| ENSG00000121211 | MND1     | Meiotic nuclear divisions 1                             | 1.92E-17 |
| ENSG00000273983 | H3C8     | H3 clustered histone 8                                  | 2.20E-17 |
| ENSG00000111602 | TIMELESS | Timeless circadian regulator                            | 2.28E-17 |
| ENSG00000137812 | KNL1     | Kinetochore scaffold 1                                  | 2.46E-17 |

|                 |          |                                                                     |          |
|-----------------|----------|---------------------------------------------------------------------|----------|
| ENSG00000184270 | H2AC21   | H2A clustered histone 21                                            | 2.53E-17 |
| ENSG00000275714 | H3C1     | H3 clustered histone 1                                              | 7.46E-17 |
| ENSG00000139618 | BRCA2    | BRCA2 DNA repair associated                                         | 8.24E-17 |
| ENSG00000109674 | NEIL3    | Nei like DNA glycosylase 3                                          | 1.13E-16 |
| ENSG00000136492 | BRIP1    | BRCA1 interacting protein C-terminal helicase 1                     | 1.15E-16 |
| ENSG00000164045 | CDC25A   | Cell division cycle 25A                                             | 1.28E-16 |
| ENSG00000163918 | RFC4     | Replication factor C subunit 4                                      | 2.26E-16 |
| ENSG00000076248 | UNG      | Uracil DNA glycosylase                                              | 3.57E-16 |
| ENSG00000149636 | DSN1     | DSN1 component of MIS12 kinetochore complex                         | 5.60E-16 |
| ENSG00000153044 | CENPH    | Centromere protein H                                                | 6.65E-16 |
| ENSG00000273802 | H2BC8    | H2B clustered histone 8                                             | 1.09E-15 |
| ENSG00000277224 | H2BC7    | H2B clustered histone 7                                             | 1.09E-15 |
| ENSG00000035499 | DEPDC1B  | DEP domain containing 1B                                            | 1.15E-15 |
| ENSG00000198056 | PRIM1    | DNA primase subunit 1                                               | 1.70E-15 |
| ENSG00000275379 | H3C11    | H3 clustered histone 11                                             | 1.97E-15 |
| ENSG00000158402 | CDC25C   | Cell division cycle 25C                                             | 2.38E-15 |
| ENSG00000237649 | KIFC1    | Kinesin family member C1                                            | 3.18E-15 |
| ENSG00000106462 | EZH2     | Enhancer of zeste 2 polycomb repressive complex 2 subunit           | 5.05E-15 |
| ENSG00000138092 | CENPO    | Centromere protein O                                                | 5.43E-15 |
| ENSG00000198554 | WDHD1    | WD repeat and HMG-box DNA binding protein 1                         | 5.67E-15 |
| ENSG00000272196 | H2AC19   | H2A clustered histone 19                                            | 5.90E-15 |
| ENSG00000104147 | OIP5     | Opa interacting protein 5                                           | 5.95E-15 |
| ENSG00000137310 | TCF19    | Transcription factor 19                                             | 6.65E-15 |
| ENSG00000197299 | BLM      | BLM recq like helicase                                              | 8.18E-15 |
| ENSG00000113810 | SMC4     | Structural maintenance of chromosomes 4                             | 9.62E-15 |
| ENSG00000180198 | RCC1     | Regulator of chromosome condensation 1                              | 1.04E-14 |
| ENSG00000123080 | CDKN2C   | Cyclin dependent kinase inhibitor 2C                                | 1.33E-14 |
| ENSG00000277775 | H3C7     | H3 clustered histone 7                                              | 1.50E-14 |
| ENSG00000076382 | SPAG5    | Sperm associated antigen 5                                          | 1.53E-14 |
| ENSG00000118193 | KIF14    | Kinesin family member 14                                            | 1.89E-14 |
| ENSG00000163808 | KIF15    | Kinesin family member 15                                            | 1.89E-14 |
| ENSG00000164032 | H2AZ1    | H2A.Z variant histone 1                                             | 1.89E-14 |
| ENSG00000166845 | C18orf54 | Chromosome 18 open reading frame 54                                 | 2.02E-14 |
| ENSG00000184260 | H2AC20   | H2A clustered histone 20                                            | 3.18E-14 |
| ENSG00000156802 | ATAD2    | Atpase family AAA domain containing 2                               | 5.01E-14 |
| ENSG00000140525 | FANCI    | FA complementation group I                                          | 6.04E-14 |
| ENSG00000221829 | FANCG    | FA complementation group G                                          | 8.53E-14 |
| ENSG00000175643 | RMI2     | Recq mediated genome instability 2                                  | 9.02E-14 |
| ENSG00000182010 | RTKN2    | Rhotekin 2                                                          | 1.31E-13 |
| ENSG00000182481 | KPNA2    | Karyopherin subunit alpha 2                                         | 1.72E-13 |
| ENSG00000196866 | H2AC7    | H2A clustered histone 7                                             | 2.23E-13 |
| ENSG00000125885 | MCM8     | Minichromosome maintenance 8 homologous recombination repair factor | 2.38E-13 |
| ENSG00000117632 | STMN1    | Stathmin 1                                                          | 2.42E-13 |
| ENSG00000278588 | H2BC10   | H2B clustered histone 10                                            | 2.86E-13 |
| ENSG00000097046 | CDC7     | Cell division cycle 7                                               | 2.97E-13 |
| ENSG00000180596 | H2BC4    | H2B clustered histone 4                                             | 3.02E-13 |
| ENSG00000102384 | CENPI    | Centromere protein I                                                | 4.38E-13 |
| ENSG00000278828 | H3C10    | H3 clustered histone 10                                             | 7.44E-13 |
| ENSG00000158164 | TMSB15A  | Thymosin beta 15a                                                   | 7.54E-13 |

|                 |          |                                                                            |          |
|-----------------|----------|----------------------------------------------------------------------------|----------|
| ENSG00000101945 | SUV39H1  | Suppressor of variegation 3-9 homolog 1                                    | 1.33E-12 |
| ENSG00000112312 | GMNN     | Geminin DNA replication inhibitor                                          | 1.43E-12 |
| ENSG00000138182 | KIF20B   | Kinesin family member 20B                                                  | 1.65E-12 |
| ENSG00000213551 | DNAJC9   | Dnaj heat shock protein family (Hsp40) member C9                           | 2.02E-12 |
| ENSG00000145604 | SKP2     | S-phase kinase associated protein 2                                        | 3.11E-12 |
| ENSG00000273703 | H2BC14   | H2B clustered histone 14                                                   | 3.32E-12 |
| ENSG00000127423 | AUNIP    | Aurora kinase A and ninein interacting protein                             | 3.37E-12 |
| ENSG00000126215 | XRCC3    | X-ray repair cross complementing 3                                         | 3.75E-12 |
| ENSG00000115163 | CENPA    | Centromere protein A                                                       | 5.97E-12 |
| ENSG00000174442 | ZWILCH   | Zwilch kinetochore protein                                                 | 5.97E-12 |
| ENSG00000167747 | C19orf48 | Chromosome 19 open reading frame 48                                        | 7.20E-12 |
| ENSG00000149554 | CHEK1    | Checkpoint kinase 1                                                        | 1.25E-11 |
| ENSG00000168393 | DTYMK    | Deoxythymidylate kinase                                                    | 1.47E-11 |
| ENSG00000108106 | UBE2S    | Ubiquitin conjugating enzyme E2 S                                          | 1.47E-11 |
| ENSG00000173207 | CKS1B    | CDC28 protein kinase regulatory subunit 1B                                 | 1.47E-11 |
| ENSG00000123473 | STIL     | STIL centriolar assembly protein                                           | 1.56E-11 |
| ENSG00000160447 | PKN3     | Protein kinase N3                                                          | 1.68E-11 |
| ENSG00000171208 | NETO2    | Neuropilin and tolloid like 2                                              | 2.13E-11 |
| ENSG00000118655 | DCLRE1B  | DNA cross-link repair 1B                                                   | 2.26E-11 |
| ENSG00000149503 | INCENP   | Inner centromere protein                                                   | 2.33E-11 |
| ENSG00000162607 | USP1     | Ubiquitin specific peptidase 1                                             | 3.63E-11 |
| ENSG00000186638 | KIF24    | Kinesin family member 24                                                   | 3.85E-11 |
| ENSG00000128245 | YWHAH    | Tyrosine 3-monooxygenase/tryptophan 5-monooxygenase activation protein eta | 6.10E-11 |
| ENSG00000136122 | BORA     | BORA aurora kinase A activator                                             | 7.18E-11 |
| ENSG00000185480 | PARPBP   | PARP1 binding protein                                                      | 7.52E-11 |
| ENSG00000197238 | H4C11    | H4 clustered histone 11                                                    | 8.01E-11 |
| ENSG00000179750 | APOBEC3B | Apolipoprotein B mma editing enzyme catalytic subunit 3B                   | 8.52E-11 |
| ENSG00000163507 | CIP2A    | Cell proliferation regulating inhibitor of protein phosphatase 2A          | 9.26E-11 |
| ENSG00000196584 | XRCC2    | X-ray repair cross complementing 2                                         | 9.26E-11 |
| ENSG00000160949 | TONSL    | Tonsoku like, DNA repair protein                                           | 9.37E-11 |
| ENSG00000121621 | KIF18A   | Kinesin family member 18A                                                  | 9.38E-11 |
| ENSG00000197061 | H4C3     | H4 clustered histone 3                                                     | 9.76E-11 |
| ENSG00000051341 | POLQ     | DNA polymerase theta                                                       | 1.04E-10 |
| ENSG00000197903 | H2BC12   | H2B clustered histone 12                                                   | 1.05E-10 |
| ENSG00000111445 | RFC5     | Replication factor C subunit 5                                             | 1.15E-10 |
| ENSG00000134222 | PSRC1    | Proline and serine rich coiled-coil 1                                      | 1.16E-10 |
| ENSG00000104738 | MCM4     | Minichromosome maintenance complex component 4                             | 1.47E-10 |
| ENSG00000128973 | CLN6     | CLN6 transmembrane ER protein                                              | 1.49E-10 |
| ENSG00000129173 | E2F8     | E2F transcription factor 8                                                 | 1.58E-10 |
| ENSG00000158373 | H2BC5    | H2B clustered histone 5                                                    | 1.67E-10 |
| ENSG00000121957 | GPSM2    | G protein signaling modulator 2                                            | 1.68E-10 |
| ENSG00000161547 | SRSF2    | Serine and arginine rich splicing factor 2                                 | 1.80E-10 |
| ENSG00000120539 | MASTL    | Microtubule associated serine/threonine kinase like                        | 2.28E-10 |
| ENSG00000159055 | MIS18A   | MIS18 kinetochore protein A                                                | 2.38E-10 |
| ENSG00000104889 | RNASEH2A | Ribonuclease H2 subunit A                                                  | 2.45E-10 |
| ENSG00000128951 | DUT      | Deoxyuridine triphosphatase                                                | 3.76E-10 |
| ENSG00000198176 | TFDP1    | Transcription factor Dp-1                                                  | 4.37E-10 |
| ENSG00000278637 | H4C1     | H4 clustered histone 1                                                     | 4.53E-10 |

|                 |            |                                                                                                 |          |
|-----------------|------------|-------------------------------------------------------------------------------------------------|----------|
| ENSG00000079616 | KIF22      | Kinesin family member 22                                                                        | 4.55E-10 |
| ENSG00000109084 | TMEM97     | Transmembrane protein 97                                                                        | 4.78E-10 |
| ENSG00000105486 | LIG1       | DNA ligase 1                                                                                    | 4.81E-10 |
| ENSG00000203814 | H2BC18     | H2B clustered histone 18                                                                        | 5.42E-10 |
| ENSG00000285920 | AC087721.2 | Novel protein                                                                                   | 5.58E-10 |
| ENSG00000101224 | CDC25B     | Cell division cycle 25B                                                                         | 5.63E-10 |
| ENSG00000099901 | RANBP1     | RAN binding protein 1                                                                           | 6.39E-10 |
| ENSG00000203760 | CENPW      | Centromere protein W                                                                            | 6.76E-10 |
| ENSG00000184445 | KNTC1      | Kinetochores associated 1                                                                       | 7.70E-10 |
| ENSG00000100479 | POLE2      | DNA polymerase epsilon 2, accessory subunit                                                     | 8.85E-10 |
| ENSG00000148019 | CEP78      | Centrosomal protein 78                                                                          | 9.22E-10 |
| ENSG00000013573 | DDX11      | DEAD/H-box helicase 11                                                                          | 1.06E-09 |
| ENSG00000100629 | CEP128     | Centrosomal protein 128                                                                         | 1.23E-09 |
| ENSG00000146674 | IGFBP3     | Insulin like growth factor binding protein 3                                                    | 1.23E-09 |
| ENSG00000234289 | H2BS1      | H2B.S histone 1                                                                                 | 1.28E-09 |
| ENSG00000154678 | PDE1C      | Phosphodiesterase 1C                                                                            | 1.44E-09 |
| ENSG00000176619 | LMNB2      | Lamin B2                                                                                        | 1.45E-09 |
| ENSG00000164649 | CDCA7L     | Cell division cycle associated 7 like                                                           | 2.01E-09 |
| ENSG00000147536 | GINS4      | GINS complex subunit 4                                                                          | 2.02E-09 |
| ENSG00000100714 | MTHFD1     | Methylenetetrahydrofolate dehydrogenase, cyclohydrolase and formyltetrahydrofolate synthetase 1 | 2.27E-09 |
| ENSG00000275591 | XKR5       | XK related 5                                                                                    | 2.70E-09 |
| ENSG00000119333 | WDR34      | WD repeat domain 34                                                                             | 3.51E-09 |
| ENSG00000146263 | MMS22L     | MMS22 like, DNA repair protein                                                                  | 3.83E-09 |
| ENSG00000146410 | MTRF2      | Mitochondrial fission regulator 2                                                               | 4.03E-09 |
| ENSG00000077514 | POLD3      | DNA polymerase delta 3, accessory subunit                                                       | 6.49E-09 |
| ENSG00000101361 | NOP56      | NOP56 ribonucleoprotein                                                                         | 7.16E-09 |
| ENSG00000107796 | ACTA2      | Actin alpha 2, smooth muscle                                                                    | 7.16E-09 |
| ENSG00000124795 | DEK        | DEK proto-oncogene                                                                              | 8.42E-09 |
| ENSG00000284946 | AC068831.8 | Novel protein                                                                                   | 1.23E-08 |
| ENSG00000115687 | PASK       | PAS domain containing serine/threonine kinase                                                   | 1.34E-08 |
| ENSG00000138376 | BARD1      | BRCA1 associated RING domain 1                                                                  | 1.43E-08 |
| ENSG00000123737 | EXOSC9     | Exosome component 9                                                                             | 1.49E-08 |
| ENSG00000172244 | C5orf34    | Chromosome 5 open reading frame 34                                                              | 1.57E-08 |
| ENSG00000092969 | TGFB2      | Transforming growth factor beta 2                                                               | 1.70E-08 |
| ENSG00000160298 | C21orf58   | Chromosome 21 open reading frame 58                                                             | 1.70E-08 |
| ENSG00000049541 | RFC2       | Replication factor C subunit 2                                                                  | 1.91E-08 |
| ENSG00000176974 | SHMT1      | Serine hydroxymethyltransferase 1                                                               | 2.07E-08 |
| ENSG00000139354 | GAS2L3     | Growth arrest specific 2 like 3                                                                 | 2.10E-08 |
| ENSG00000062822 | POLD1      | DNA polymerase delta 1, catalytic subunit                                                       | 2.74E-08 |
| ENSG00000132436 | FIGNL1     | Fidgetin like 1                                                                                 | 3.69E-08 |
| ENSG00000100749 | VRK1       | VRK serine/threonine kinase 1                                                                   | 4.01E-08 |
| ENSG00000187123 | LYPD6      | LY6/PLAUR domain containing 6                                                                   | 4.25E-08 |
| ENSG00000275713 | H2BC9      | H2B clustered histone 9                                                                         | 4.49E-08 |
| ENSG00000186767 | SPIN4      | Spindlin family member 4                                                                        | 4.97E-08 |
| ENSG00000151849 | CENPJ      | Centromere protein J                                                                            | 5.97E-08 |
| ENSG00000177084 | POLE       | DNA polymerase epsilon, catalytic subunit                                                       | 6.10E-08 |
| ENSG00000091651 | ORC6       | Origin recognition complex subunit 6                                                            | 6.47E-08 |
| ENSG00000154146 | NRGN       | Neurogranin                                                                                     | 7.63E-08 |
| ENSG00000278705 | H4C2       | H4 clustered histone 2                                                                          | 7.75E-08 |
| ENSG00000189403 | HMGB1      | High mobility group box 1                                                                       | 7.95E-08 |

|                 |            |                                                                                                      |          |
|-----------------|------------|------------------------------------------------------------------------------------------------------|----------|
| ENSG00000137563 | GGH        | Gamma-glutamyl hydrolase                                                                             | 8.73E-08 |
| ENSG00000135763 | URB2       | URB2 ribosome biogenesis homolog                                                                     | 8.85E-08 |
| ENSG00000158406 | H4C8       | H4 clustered histone 8                                                                               | 9.41E-08 |
| ENSG00000187514 | PTMA       | Prothymosin alpha                                                                                    | 9.89E-08 |
| ENSG00000214826 | DDX12P     | DEAD/H-box helicase 12, pseudogene                                                                   | 1.18E-07 |
| ENSG00000274750 | H3C6       | H3 clustered histone 6                                                                               | 1.38E-07 |
| ENSG00000274290 | H2BC6      | H2B clustered histone 6                                                                              | 1.39E-07 |
| ENSG00000117877 | CD3EAP     | CD3e molecule associated protein                                                                     | 1.41E-07 |
| ENSG00000131351 | HAUS8      | HAUS augmin like complex subunit 8                                                                   | 1.46E-07 |
| ENSG00000154920 | EME1       | Essential meiotic structure-specific endonuclease 1                                                  | 1.48E-07 |
| ENSG00000178409 | BEND3      | BEN domain containing 3                                                                              | 1.61E-07 |
| ENSG00000179431 | FJX1       | Four-jointed box kinase 1                                                                            | 1.71E-07 |
| ENSG00000137135 | ARHGEF39   | Rho guanine nucleotide exchange factor 39                                                            | 1.93E-07 |
| ENSG00000162062 | TEDC2      | Tubulin epsilon and delta complex 2                                                                  | 2.23E-07 |
| ENSG00000109861 | CTSC       | Cathepsin C                                                                                          | 2.43E-07 |
| ENSG00000101773 | RBBP8      | RB binding protein 8, endonuclease                                                                   | 2.45E-07 |
| ENSG00000124610 | H1-1       | H1.1 linker histone, cluster member                                                                  | 2.57E-07 |
| ENSG00000123374 | CDK2       | Cyclin dependent kinase 2                                                                            | 2.68E-07 |
| ENSG00000259316 | AC087632.2 | Novel protein                                                                                        | 3.26E-07 |
| ENSG00000166451 | CENPN      | Centromere protein N                                                                                 | 3.70E-07 |
| ENSG00000168411 | RFWD3      | Ring finger and WD repeat domain 3                                                                   | 3.78E-07 |
| ENSG00000137124 | ALDH1B1    | Aldehyde dehydrogenase 1 family member B1                                                            | 3.92E-07 |
| ENSG00000156398 | SFXN2      | Sideroflexin 2                                                                                       | 4.08E-07 |
| ENSG00000178966 | RMI1       | Recq mediated genome instability 1                                                                   | 4.34E-07 |
| ENSG00000101938 | CHRDL1     | Chordin like 1                                                                                       | 4.68E-07 |
| ENSG00000123213 | NLN        | Neurolysin                                                                                           | 4.94E-07 |
| ENSG00000085999 | RAD54L     | RAD54 like                                                                                           | 6.27E-07 |
| ENSG00000213186 | TRIM59     | Tripartite motif containing 59                                                                       | 7.59E-07 |
| ENSG00000159147 | DONSON     | Downstream neighbor of SON                                                                           | 7.83E-07 |
| ENSG00000233822 | H2BC15     | H2B clustered histone 15                                                                             | 8.01E-07 |
| ENSG00000181588 | MEX3D      | Mex-3 RNA binding family member D                                                                    | 8.26E-07 |
| ENSG00000123416 | TUBA1B     | Tubulin alpha 1b                                                                                     | 8.37E-07 |
| ENSG00000006634 | DBF4       | DBF4 zinc finger                                                                                     | 8.41E-07 |
| ENSG00000163950 | SLBP       | Stem-loop binding protein                                                                            | 8.46E-07 |
| ENSG00000166801 | FAM111A    | Family with sequence similarity 111 member A                                                         | 9.14E-07 |
| ENSG00000275221 | H2AC15     | H2A clustered histone 15                                                                             | 9.77E-07 |
| ENSG00000205208 | C4orf46    | Chromosome 4 open reading frame 46                                                                   | 9.94E-07 |
| ENSG00000259781 | HMGB1P6    | High mobility group box 1 pseudogene 6                                                               | 1.11E-06 |
| ENSG00000128050 | PAICS      | Phosphoribosylaminoimidazole carboxylase and phosphoribosylaminoimidazolesuccinocarboxamide synthase | 1.19E-06 |
| ENSG00000095002 | MSH2       | Muts homolog 2                                                                                       | 1.19E-06 |
| ENSG00000172197 | MBOAT1     | Membrane bound O-acyltransferase domain containing 1                                                 | 1.29E-06 |
| ENSG00000180914 | OXTR       | Oxytocin receptor                                                                                    | 1.29E-06 |
| ENSG00000156136 | DCK        | Deoxycytidine kinase                                                                                 | 1.32E-06 |
| ENSG00000127586 | CHTF18     | Chromosome transmission fidelity factor 18                                                           | 1.44E-06 |
| ENSG00000005189 | REXO5      | RNA exonuclease 5                                                                                    | 1.52E-06 |
| ENSG00000120334 | CENPL      | Centromere protein L                                                                                 | 1.58E-06 |
| ENSG00000125450 | NUP85      | Nucleoporin 85                                                                                       | 1.79E-06 |
| ENSG00000171793 | CTPS1      | CTP synthase 1                                                                                       | 1.80E-06 |
| ENSG00000171791 | BCL2       | BCL2 apoptosis regulator                                                                             | 2.08E-06 |

|                 |          |                                                                      |          |
|-----------------|----------|----------------------------------------------------------------------|----------|
| ENSG00000213853 | EMP2     | Epithelial membrane protein 2                                        | 2.15E-06 |
| ENSG00000105974 | CAV1     | Caveolin 1                                                           | 2.16E-06 |
| ENSG00000183287 | CCBE1    | Collagen and calcium binding EGF domains 1                           | 2.34E-06 |
| ENSG00000129534 | MIS18BP1 | MIS18 binding protein 1                                              | 2.36E-06 |
| ENSG00000103995 | CEP152   | Centrosomal protein 152                                              | 2.41E-06 |
| ENSG00000129038 | LOXL1    | Lysyl oxidase like 1                                                 | 2.49E-06 |
| ENSG00000127863 | TNFRSF19 | TNF receptor superfamily member 19                                   | 2.72E-06 |
| ENSG00000149929 | HIRIP3   | HIRA interacting protein 3                                           | 2.72E-06 |
| ENSG00000137054 | POLR1E   | RNA polymerase I subunit E                                           | 2.94E-06 |
| ENSG00000025770 | NCAPH2   | Non-SMC condensin II complex subunit H2                              | 2.98E-06 |
| ENSG00000275126 | H4C13    | H4 clustered histone 13                                              | 3.15E-06 |
| ENSG00000172687 | ZNF738   | Zinc finger protein 738                                              | 3.41E-06 |
| ENSG00000134986 | NREP     | Neuronal regeneration related protein                                | 3.42E-06 |
| ENSG00000145861 | C1QTNF2  | C1q and TNF related 2                                                | 4.42E-06 |
| ENSG00000197275 | RAD54B   | RAD54 homolog B                                                      | 4.72E-06 |
| ENSG00000100504 | PYGL     | Glycogen phosphorylase L                                             | 4.74E-06 |
| ENSG00000115875 | SRSF7    | Serine and arginine rich splicing factor 7                           | 4.90E-06 |
| ENSG00000197771 | MCMBP    | Minichromosome maintenance complex binding protein                   | 5.79E-06 |
| ENSG00000146143 | PRIM2    | DNA primase subunit 2                                                | 5.84E-06 |
| ENSG00000080839 | RBL1     | RB transcriptional corepressor like 1                                | 6.04E-06 |
| ENSG00000165501 | LRR1     | Leucine rich repeat protein 1                                        | 6.04E-06 |
| ENSG00000113569 | NUP155   | Nucleoporin 155                                                      | 6.15E-06 |
| ENSG00000165891 | E2F7     | E2F transcription factor 7                                           | 7.59E-06 |
| ENSG00000111581 | NUP107   | Nucleoporin 107                                                      | 7.86E-06 |
| ENSG00000125485 | DDX31    | DEAD-box helicase 31                                                 | 8.25E-06 |
| ENSG00000000460 | C1orf112 | Chromosome 1 open reading frame 112                                  | 1.05E-05 |
| ENSG00000154839 | SKA1     | Spindle and kinetochore associated complex subunit 1                 | 1.07E-05 |
| ENSG00000115159 | GPD2     | Glycerol-3-phosphate dehydrogenase 2                                 | 1.10E-05 |
| ENSG00000106628 | POLD2    | DNA polymerase delta 2, accessory subunit                            | 1.11E-05 |
| ENSG00000197472 | ZNF695   | Zinc finger protein 695                                              | 1.14E-05 |
| ENSG00000070950 | RAD18    | RAD18 E3 ubiquitin protein ligase                                    | 1.14E-05 |
| ENSG00000164687 | FABP5    | Fatty acid binding protein 5                                         | 1.19E-05 |
| ENSG00000168405 | CMAHP    | Cytidine monophospho-N-acetylneuraminic acid hydroxylase, pseudogene | 1.20E-05 |
| ENSG00000166881 | NEMP1    | Nuclear envelope integral membrane protein 1                         | 1.20E-05 |
| ENSG00000284491 | THSD8    | Thrombospondin type 1 domain containing 8                            | 1.22E-05 |
| ENSG00000120437 | ACAT2    | Acetyl-coa acetyltransferase 2                                       | 1.31E-05 |
| ENSG00000213024 | NUP62    | Nucleoporin 62                                                       | 1.31E-05 |
| ENSG00000123136 | DDX39A   | Dexd-box helicase 39A                                                | 1.34E-05 |
| ENSG00000148229 | POLE3    | DNA polymerase epsilon 3, accessory subunit                          | 1.36E-05 |
| ENSG00000163781 | TOPBP1   | DNA topoisomerase II binding protein 1                               | 1.56E-05 |
| ENSG00000136824 | SMC2     | Structural maintenance of chromosomes 2                              | 1.66E-05 |
| ENSG00000170017 | ALCAM    | Activated leukocyte cell adhesion molecule                           | 1.95E-05 |
| ENSG00000173894 | CBX2     | Chromobox 2                                                          | 1.95E-05 |
| ENSG00000099194 | SCD      | Stearoyl-coa desaturase                                              | 1.95E-05 |
| ENSG00000132341 | RAN      | RAN, member RAS oncogene family                                      | 1.95E-05 |
| ENSG00000181751 | C5orf30  | Chromosome 5 open reading frame 30                                   | 1.95E-05 |
| ENSG00000040275 | SPDL1    | Spindle apparatus coiled-coil protein 1                              | 1.96E-05 |
| ENSG00000134775 | FHOD3    | Formin homology 2 domain containing 3                                | 1.97E-05 |
| ENSG00000123975 | CKS2     | CDC28 protein kinase regulatory subunit 2                            | 2.26E-05 |
| ENSG00000031691 | CENPQ    | Centromere protein Q                                                 | 2.27E-05 |

|                 |          |                                                                   |          |
|-----------------|----------|-------------------------------------------------------------------|----------|
| ENSG00000132646 | PCNA     | Proliferating cell nuclear antigen                                | 2.40E-05 |
| ENSG00000149136 | SSRP1    | Structure specific recognition protein 1                          | 2.40E-05 |
| ENSG00000197451 | HNRNPAB  | Heterogeneous nuclear ribonucleoprotein A/B                       | 2.40E-05 |
| ENSG00000175183 | CSRP2    | Cysteine and glycine rich protein 2                               | 2.48E-05 |
| ENSG00000132661 | NXT1     | Nuclear transport factor 2 like export factor 1                   | 2.94E-05 |
| ENSG00000183496 | MEX3B    | Mex-3 RNA binding family member B                                 | 3.01E-05 |
| ENSG00000104356 | POP1     | POP1 homolog, ribonuclease P/MRP subunit                          | 3.05E-05 |
| ENSG00000116774 | OLFML3   | Olfactomedin like 3                                               | 3.18E-05 |
| ENSG00000184162 | NR2C2AP  | Nuclear receptor 2C2 associated protein                           | 3.29E-05 |
| ENSG00000143179 | UCK2     | Uridine-cytidine kinase 2                                         | 3.74E-05 |
| ENSG00000135549 | PKIB     | Camp-dependent protein kinase inhibitor beta                      | 3.79E-05 |
| ENSG00000135045 | C9orf40  | Chromosome 9 open reading frame 40                                | 3.81E-05 |
| ENSG00000136518 | ACTL6A   | Actin like 6A                                                     | 3.95E-05 |
| ENSG00000119285 | HEATR1   | HEAT repeat containing 1                                          | 4.09E-05 |
| ENSG00000112081 | SRSF3    | Serine and arginine rich splicing factor 3                        | 4.67E-05 |
| ENSG00000072571 | HMMR     | Hyaluronan mediated motility receptor                             | 4.71E-05 |
| ENSG00000074800 | ENO1     | Enolase 1                                                         | 4.82E-05 |
| ENSG00000115648 | MLPH     | Melanophilin                                                      | 5.09E-05 |
| ENSG00000103495 | MAZ      | MYC associated zinc finger protein                                | 5.27E-05 |
| ENSG00000164125 | GASK1B   | Golgi associated kinase 1B                                        | 5.68E-05 |
| ENSG00000160352 | ZNF714   | Zinc finger protein 714                                           | 5.72E-05 |
| ENSG00000124207 | CSE1L    | Chromosome segregation 1 like                                     | 5.80E-05 |
| ENSG00000120158 | RCL1     | RNA terminal phosphate cyclase like 1                             | 5.94E-05 |
| ENSG00000116679 | IVNS1ABP | Influenza virus NS1A binding protein                              | 6.04E-05 |
| ENSG00000184897 | H1-10    | H1.10 linker histone                                              | 6.18E-05 |
| ENSG00000176208 | ATAD5    | Atpase family AAA domain containing 5                             | 6.32E-05 |
| ENSG00000162909 | CAPN2    | Calpain 2                                                         | 6.46E-05 |
| ENSG00000076770 | MBNL3    | Muscleblind like splicing regulator 3                             | 7.56E-05 |
| ENSG00000127337 | YEATS4   | YEATS domain containing 4                                         | 8.03E-05 |
| ENSG00000101911 | PRPS2    | Phosphoribosyl pyrophosphate synthetase 2                         | 8.10E-05 |
| ENSG00000158427 | TMSB15B  | Thymosin beta 15B                                                 | 8.10E-05 |
| ENSG00000143815 | LBR      | Lamin B receptor                                                  | 8.19E-05 |
| ENSG00000168672 | LRATD2   | LRAT domain containing 2                                          | 8.58E-05 |
| ENSG00000170540 | ARL6IP1  | ADP ribosylation factor like gtpase 6 interacting protein 1       | 9.16E-05 |
| ENSG00000249115 | HAUS5    | HAUS augmin like complex subunit 5                                | 9.19E-05 |
| ENSG00000134291 | TMEM106C | Transmembrane protein 106C                                        | 9.68E-05 |
| ENSG00000164105 | SAP30    | Sin3A associated protein 30                                       | 9.76E-05 |
| ENSG00000058804 | NDC1     | NDC1 transmembrane nucleoporin                                    | 9.97E-05 |
| ENSG00000156876 | SASS6    | SAS-6 centriolar assembly protein                                 | 1.00E-04 |
| ENSG00000276966 | H4C5     | H4 clustered histone 5                                            | 0.000109 |
| ENSG00000125319 | HROB     | Homologous recombination factor with OB-fold                      | 0.000119 |
| ENSG00000185760 | KCNQ5    | Potassium voltage-gated channel subfamily Q member 5              | 0.00012  |
| ENSG00000029993 | HMGB3    | High mobility group box 3                                         | 0.000128 |
| ENSG00000122870 | BICC1    | Bicc family RNA binding protein 1                                 | 0.000143 |
| ENSG00000125384 | PTGER2   | Prostaglandin E receptor 2                                        | 0.00015  |
| ENSG00000053372 | MRTO4    | MRT4 homolog, ribosome maturation factor                          | 0.000162 |
| ENSG00000120658 | ENOX1    | Ecto-NOX disulfide-thiol exchanger 1                              | 0.000179 |
| ENSG00000079462 | PAFAH1B3 | Platelet activating factor acetylhydrolase 1b catalytic subunit 3 | 0.000181 |
| ENSG00000117519 | CNN3     | Calponin 3                                                        | 0.000191 |
| ENSG00000114999 | TTL      | Tubulin tyrosine ligase                                           | 0.000191 |



|                 |         |                                                                                                                            |          |
|-----------------|---------|----------------------------------------------------------------------------------------------------------------------------|----------|
| ENSG00000115380 | EFEMP1  | EGF containing fibulin extracellular matrix protein 1                                                                      | 0.000193 |
| ENSG00000072041 | SLC6A15 | Solute carrier family 6 member 15                                                                                          | 0.000196 |
| ENSG00000061337 | LZTS1   | Leucine zipper tumor suppressor 1                                                                                          | 0.000196 |
| ENSG00000126453 | BCL2L12 | BCL2 like 12                                                                                                               | 0.000197 |
| ENSG00000012963 | UBR7    | Ubiquitin protein ligase E3 component n-recognin 7 (putative)                                                              | 0.000201 |
| ENSG00000100526 | CDKN3   | Cyclin dependent kinase inhibitor 3                                                                                        | 0.000204 |
| ENSG00000169258 | GPRIN1  | G protein regulated inducer of neurite outgrowth 1                                                                         | 0.000204 |
| ENSG00000147202 | DIAPH2  | Diaphanous related formin 2                                                                                                | 0.00021  |
| ENSG00000184635 | ZNF93   | Zinc finger protein 93                                                                                                     | 0.000221 |
| ENSG00000196230 | TUBB    | Tubulin beta class I                                                                                                       | 0.000234 |
| ENSG00000170264 | FAM161A | FAM161 centrosomal protein A                                                                                               | 0.000257 |
| ENSG00000137814 | HAUS2   | HAUS augmin like complex subunit 2                                                                                         | 0.00026  |
| ENSG00000130816 | DNMT1   | DNA methyltransferase 1                                                                                                    | 0.00027  |
| ENSG00000155858 | LSM11   | LSM11, U7 small nuclear RNA associated                                                                                     | 0.000283 |
| ENSG00000136527 | TRA2B   | Transformer 2 beta homolog                                                                                                 | 0.000285 |
| ENSG00000071575 | TRIB2   | Tribbles pseudokinase 2                                                                                                    | 0.000285 |
| ENSG00000198830 | HMG2    | High mobility group nucleosomal binding domain 2                                                                           | 0.000288 |
| ENSG00000146281 | PM20D2  | Peptidase M20 domain containing 2                                                                                          | 0.000291 |
| ENSG00000176894 | PXMP2   | Peroxisomal membrane protein 2                                                                                             | 0.000299 |
| ENSG00000136450 | SRSF1   | Serine and arginine rich splicing factor 1                                                                                 | 0.000303 |
| ENSG00000151376 | ME3     | Malic enzyme 3                                                                                                             | 0.000304 |
| ENSG00000151287 | TEX30   | Testis expressed 30                                                                                                        | 0.000309 |
| ENSG00000242114 | MTFP1   | Mitochondrial fission process 1                                                                                            | 0.000313 |
| ENSG00000120217 | CD274   | CD274 molecule                                                                                                             | 0.00032  |
| ENSG00000135446 | CDK4    | Cyclin dependent kinase 4                                                                                                  | 0.000324 |
| ENSG00000154760 | SLFN13  | Schlafen family member 13                                                                                                  | 0.000337 |
| ENSG00000170515 | PA2G4   | Proliferation-associated 2G4                                                                                               | 0.00036  |
| ENSG00000159131 | GART    | Phosphoribosylglycinamide formyltransferase, phosphoribosylglycinamide synthetase, phosphoribosylaminoimidazole synthetase | 0.000381 |
| ENSG00000177917 | ARL6IP6 | ADP ribosylation factor like gtpase 6 interacting protein 6                                                                | 0.000387 |
| ENSG00000141052 | MYOCD   | Myocardin                                                                                                                  | 0.000387 |
| ENSG00000181544 | FANCB   | FA complementation group B                                                                                                 | 0.000418 |
| ENSG00000149485 | FADS1   | Fatty acid desaturase 1                                                                                                    | 0.00043  |
| ENSG00000116830 | TTF2    | Transcription termination factor 2                                                                                         | 0.000436 |
| ENSG00000180730 | SHISA2  | Shisa family member 2                                                                                                      | 0.000456 |
| ENSG00000196363 | WDR5    | WD repeat domain 5                                                                                                         | 0.000456 |
| ENSG00000073536 | NLE1    | Notchless homolog 1                                                                                                        | 0.000463 |
| ENSG00000183527 | PSMG1   | Proteasome assembly chaperone 1                                                                                            | 0.0005   |
| ENSG00000164985 | PSIP1   | PC4 and SFRS1 interacting protein 1                                                                                        | 0.000503 |
| ENSG00000139278 | GLIPR1  | GLI pathogenesis related 1                                                                                                 | 0.000507 |
| ENSG00000163535 | SGO2    | Shugoshin 2                                                                                                                | 0.000521 |
| ENSG00000104626 | ERI1    | Exoribonuclease 1                                                                                                          | 0.000524 |
| ENSG00000114346 | ECT2    | Epithelial cell transforming 2                                                                                             | 0.000524 |
| ENSG00000065150 | IPO5    | Importin 5                                                                                                                 | 0.000527 |
| ENSG00000196456 | ZNF775  | Zinc finger protein 775                                                                                                    | 0.000547 |
| ENSG00000213160 | KLHL23  | Kelch like family member 23                                                                                                | 0.000558 |
| ENSG00000156466 | GDF6    | Growth differentiation factor 6                                                                                            | 0.00057  |
| ENSG00000241697 | TMEFF1  | Transmembrane protein with EGF like and two follistatin like domains 1                                                     | 0.000589 |

|                 |            |                                                               |          |
|-----------------|------------|---------------------------------------------------------------|----------|
| ENSG0000011304  | PTBP1      | Polypyrimidine tract binding protein 1                        | 0.0006   |
| ENSG00000244306 | AL589743.1 | Double homeobox A pseudogene 10                               | 0.000628 |
| ENSG00000071564 | TCF3       | Transcription factor 3                                        | 0.000661 |
| ENSG00000243444 |            |                                                               | 0.000668 |
| ENSG00000155561 | NUP205     | Nucleoporin 205                                               | 0.000671 |
| ENSG0000012048  | BRCA1      | BRCA1 DNA repair associated                                   | 0.000727 |
| ENSG00000184661 | CDCA2      | Cell division cycle associated 2                              | 0.000727 |
| ENSG0000029153  | ARNTL2     | Aryl hydrocarbon receptor nuclear translocator like 2         | 0.000746 |
| ENSG00000162419 | GMEB1      | Glucocorticoid modulatory element binding protein 1           | 0.000801 |
| ENSG00000128059 | PPAT       | Phosphoribosyl pyrophosphate amidotransferase                 | 0.000862 |
| ENSG00000138346 | DNA2       | DNA replication helicase/nuclease 2                           | 0.000869 |
| ENSG00000184009 | ACTG1      | Actin gamma 1                                                 | 0.000872 |
| ENSG00000077684 | JADE1      | Jade family PHD finger 1                                      | 0.000926 |
| ENSG00000151503 | NCAPD3     | Non-SMC condensin II complex subunit D3                       | 0.000928 |
| ENSG00000150687 | PRSS23     | Serine protease 23                                            | 0.000939 |
| ENSG00000106268 | NUDT1      | Nudix hydrolase 1                                             | 0.000995 |
| ENSG00000132780 | NASP       | Nuclear autoantigenic sperm protein                           | 0.001004 |
| ENSG00000183763 | TRAIIP     | TRAF interacting protein                                      | 0.001006 |
| ENSG00000116062 | MSH6       | Muts homolog 6                                                | 0.001032 |
| ENSG00000159176 | CSRP1      | Cysteine and glycine rich protein 1                           | 0.001037 |
| ENSG00000143493 | INTS7      | Integrator complex subunit 7                                  | 0.001083 |
| ENSG00000044524 | EPHA3      | EPH receptor A3                                               | 0.001098 |
| ENSG00000169813 | HNRNPF     | Heterogeneous nuclear ribonucleoprotein F                     | 0.001139 |
| ENSG00000118513 | MYB        | MYB proto-oncogene, transcription factor                      | 0.001146 |
| ENSG00000145681 | HAPLN1     | Hyaluronan and proteoglycan link protein 1                    | 0.001152 |
| ENSG00000075624 | ACTB       | Actin beta                                                    | 0.001168 |
| ENSG00000147955 | SIGMAR1    | Sigma non-opioid intracellular receptor 1                     | 0.001168 |
| ENSG00000165724 | ZMYND19    | Zinc finger MYND-type containing 19                           | 0.001176 |
| ENSG00000130826 | DKC1       | Dyskerin pseudouridine synthase 1                             | 0.001241 |
| ENSG00000119326 | CTNNAL1    | Catenin alpha like 1                                          | 0.001243 |
| ENSG00000181201 | H2BU2P     | H2B.U histone 2, pseudogene                                   | 0.001268 |
| ENSG00000265107 | GJA5       | Gap junction protein alpha 5                                  | 0.00127  |
| ENSG00000135245 | HILPDA     | Hypoxia inducible lipid droplet associated                    | 0.001276 |
| ENSG00000085415 | SEH1L      | SEH1 like nucleoporin                                         | 0.001282 |
| ENSG00000162849 | KIF26B     | Kinesin family member 26B                                     | 0.001282 |
| ENSG00000111450 | STX2       | Syntaxin 2                                                    | 0.001361 |
| ENSG00000198885 | ITPRIPL1   | ITPRIP like 1                                                 | 0.001386 |
| ENSG00000120699 | EXOSC8     | Exosome component 8                                           | 0.001492 |
| ENSG00000128408 | RIBC2      | RIB43A domain with coiled-coils 2                             | 0.001537 |
| ENSG00000186777 | ZNF732     | Zinc finger protein 732                                       | 0.001561 |
| ENSG00000083720 | OXCT1      | 3-oxoacid coa-transferase 1                                   | 0.001587 |
| ENSG00000154734 | ADAMTS1    | ADAM metallopeptidase with thrombospondin type 1 motif 1      | 0.0016   |
| ENSG00000170468 | RIOX1      | Ribosomal oxygenase 1                                         | 0.001616 |
| ENSG00000187840 | EIF4EBP1   | Eukaryotic translation initiation factor 4E binding protein 1 | 0.001625 |
| ENSG00000147274 | RBMX       | RNA binding motif protein X-linked                            | 0.001676 |
| ENSG00000183684 | ALYREF     | Aly/REF export factor                                         | 0.001693 |
| ENSG00000140416 | TPM1       | Tropomyosin 1                                                 | 0.001764 |
| ENSG00000215784 | FAM72D     | Family with sequence similarity 72 member D                   | 0.00178  |
| ENSG00000136699 | SMPD4      | Sphingomyelin phosphodiesterase 4                             | 0.001815 |

|                 |            |                                                                  |          |
|-----------------|------------|------------------------------------------------------------------|----------|
| ENSG00000139734 | DIAPH3     | Diaphanous related formin 3                                      | 0.001838 |
| ENSG00000155755 | TMEM237    | Transmembrane protein 237                                        | 0.001847 |
| ENSG00000075702 | WDR62      | WD repeat domain 62                                              | 0.001889 |
| ENSG00000152240 | HAUS1      | HAUS augmin like complex subunit 1                               | 0.001901 |
| ENSG00000118596 | SLC16A7    | Solute carrier family 16 member 7                                | 0.001906 |
| ENSG00000178202 | POGLUT3    | Protein O-glucosyltransferase 3                                  | 0.001923 |
| ENSG00000185347 | TEDC1      | Tubulin epsilon and delta complex 1                              | 0.001923 |
| ENSG00000144681 | STAC       | SH3 and cysteine rich domain                                     | 0.001961 |
| ENSG00000108055 | SMC3       | Structural maintenance of chromosomes 3                          | 0.002061 |
| ENSG00000160752 | FDP5       | Farnesyl diphosphate synthase                                    | 0.002073 |
| ENSG00000145545 | SRD5A1     | Steroid 5 alpha-reductase 1                                      | 0.002081 |
| ENSG00000283559 | AC139491.6 | Centrosomal protein 192kda (CEP192) pseudogene                   | 0.002103 |
| ENSG00000188312 | CENPP      | Centromere protein P                                             | 0.002104 |
| ENSG00000085276 | MECOM      | MDS1 and EVI1 complex locus                                      | 0.002104 |
| ENSG00000187193 | MT1X       | Metallothionein 1X                                               | 0.002138 |
| ENSG00000196890 | H2BU1      | H2B.U histone 1                                                  | 0.002277 |
| ENSG00000145675 | PIK3R1     | Phosphoinositide-3-kinase regulatory subunit 1                   | 0.002405 |
| ENSG00000116120 | FARSB      | Phenylalanyl-trna synthetase subunit beta                        | 0.00243  |
| ENSG00000102098 | SCML2      | Scm polycomb group protein like 2                                | 0.002441 |
| ENSG00000154646 | TMPRSS15   | Transmembrane serine protease 15                                 | 0.002478 |
| ENSG00000138741 | TRPC3      | Transient receptor potential cation channel subfamily C member 3 | 0.002539 |
| ENSG00000179409 | GEMIN4     | Gem nuclear organelle associated protein 4                       | 0.002549 |
| ENSG00000120800 | UTP20      | UTP20 small subunit processome component                         | 0.002564 |
| ENSG00000144283 | PKP4       | Plakophilin 4                                                    | 0.002606 |
| ENSG00000164002 | EXO5       | Exonuclease 5                                                    | 0.002673 |
| ENSG00000136875 | PRPF4      | Pre-mrna processing factor 4                                     | 0.00274  |
| ENSG00000172336 | POP7       | POP7 homolog, ribonuclease P/MRP subunit                         | 0.002743 |
| ENSG00000108179 | PPIF       | Peptidylprolyl isomerase F                                       | 0.002788 |
| ENSG00000204899 | MZT1       | Mitotic spindle organizing protein 1                             | 0.002791 |
| ENSG00000102172 | SMS        | Spermine synthase                                                | 0.002791 |
| ENSG00000160193 | WDR4       | WD repeat domain 4                                               | 0.002804 |
| ENSG00000099256 | PRTFDC1    | Phosphoribosyl transferase domain containing 1                   | 0.002851 |
| ENSG00000117597 | UTP25      | UTP25 small subunit processor component                          | 0.002851 |
| ENSG00000277443 | MARCKS     | Myristoylated alanine rich protein kinase C substrate            | 0.002864 |
| ENSG00000101546 | RBFA       | Ribosome binding factor A                                        | 0.002874 |
| ENSG00000172927 | MYEOV      | Myeloma overexpressed                                            | 0.002986 |
| ENSG00000100304 | TTL12      | Tubulin tyrosine ligase like 12                                  | 0.002989 |
| ENSG00000149548 | CCDC15     | Coiled-coil domain containing 15                                 | 0.003006 |
| ENSG00000261236 | BOP1       | BOP1 ribosomal biogenesis factor                                 | 0.003065 |
| ENSG00000103540 | CCP110     | Centriolar coiled-coil protein 110                               | 0.003113 |
| ENSG00000112658 | SRF        | Serum response factor                                            | 0.003113 |
| ENSG00000243955 | GSTA1      | Glutathione S-transferase alpha 1                                | 0.003113 |
| ENSG00000178695 | KCTD12     | Potassium channel tetramerization domain containing 12           | 0.003123 |
| ENSG00000115232 | ITGA4      | Integrin subunit alpha 4                                         | 0.003142 |
| ENSG00000248710 | AC079594.2 | TRIM59 and ift80 readthrough                                     | 0.003189 |
| ENSG00000119403 | PHF19      | PHD finger protein 19                                            | 0.003195 |
| ENSG00000096060 | FKBP5      | FKBP prolyl isomerase 5                                          | 0.003342 |
| ENSG00000203668 | CHML       | CHM like Rab escort protein                                      | 0.003471 |
| ENSG00000111057 | KRT18      | Keratin 18                                                       | 0.0035   |
| ENSG00000134758 | RNF138     | Ring finger protein 138                                          | 0.003524 |

|                 |           |                                                                      |          |
|-----------------|-----------|----------------------------------------------------------------------|----------|
| ENSG00000141668 | CBLN2     | Cerebellin 2 precursor                                               | 0.003524 |
| ENSG00000134824 | FADS2     | Fatty acid desaturase 2                                              | 0.003548 |
| ENSG00000107104 | KANK1     | KN motif and ankyrin repeat domains 1                                | 0.003577 |
| ENSG00000135362 | PRR5L     | Proline rich 5 like                                                  | 0.003625 |
| ENSG00000143157 | POGK      | Pogo transposable element derived with KRAB domain                   | 0.003625 |
| ENSG00000189212 | DPY19L2P1 | DPY19L2 pseudogene 1                                                 | 0.003625 |
| ENSG00000132669 | RIN2      | Ras and Rab interactor 2                                             | 0.003653 |
| ENSG00000005059 | MCUB      | Mitochondrial calcium uniporter dominant negative beta subunit       | 0.00371  |
| ENSG00000092201 | SUPT16H   | SPT16 homolog, facilitates chromatin remodeling subunit              | 0.00371  |
| ENSG00000256229 | ZNF486    | Zinc finger protein 486                                              | 0.003799 |
| ENSG00000154473 | BUB3      | BUB3 mitotic checkpoint protein                                      | 0.00386  |
| ENSG00000082516 | GEMIN5    | Gem nuclear organelle associated protein 5                           | 0.003888 |
| ENSG00000092964 | DPYSL2    | Dihydropyrimidinase like 2                                           | 0.003938 |
| ENSG00000217555 | CKLF      | Chemokine like factor                                                | 0.003966 |
| ENSG00000082512 | TRAF5     | TNF receptor associated factor 5                                     | 0.004092 |
| ENSG00000106144 | CASP2     | Caspase 2                                                            | 0.004163 |
| ENSG00000136261 | BZW2      | Basic leucine zipper and W2 domains 2                                | 0.004163 |
| ENSG00000101407 | TTI1      | TELO2 interacting protein 1                                          | 0.004374 |
| ENSG00000115461 | IGFBP5    | Insulin like growth factor binding protein 5                         | 0.004374 |
| ENSG00000170153 | RNF150    | Ring finger protein 150                                              | 0.004395 |
| ENSG00000188807 | TMEM201   | Transmembrane protein 201                                            | 0.004395 |
| ENSG00000164284 | GRPEL2    | Grpe like 2, mitochondrial                                           | 0.004448 |
| ENSG00000075131 | TIPIN     | TIMELESS interacting protein                                         | 0.004618 |
| ENSG00000130935 | NOL11     | Nucleolar protein 11                                                 | 0.004644 |
| ENSG00000112039 | FANCE     | FA complementation group E                                           | 0.004664 |
| ENSG00000107566 | ERLIN1    | ER lipid raft associated 1                                           | 0.004817 |
| ENSG00000113460 | BRX1      | Biogenesis of ribosomes BRX1                                         | 0.004964 |
| ENSG00000122644 | ARL4A     | ADP ribosylation factor like gtpase 4A                               | 0.004964 |
| ENSG00000116237 | ICMT      | Isoprenylcysteine carboxyl methyltransferase                         | 0.00499  |
| ENSG00000161647 | MPP3      | Membrane palmitoylated protein 3                                     | 0.005072 |
| ENSG00000198912 | C1orf174  | Chromosome 1 open reading frame 174                                  | 0.005313 |
| ENSG00000091527 | CDV3      | CDV3 homolog                                                         | 0.005338 |
| ENSG00000186522 | SEPTIN10  | Septin 10                                                            | 0.005419 |
| ENSG00000161996 | WDR90     | WD repeat domain 90                                                  | 0.005475 |
| ENSG00000134285 | FKBP11    | FKBP prolyl isomerase 11                                             | 0.005555 |
| ENSG00000138587 | MNS1      | Meiosis specific nuclear structural 1                                | 0.005555 |
| ENSG00000204291 | COL15A1   | Collagen type XV alpha 1 chain                                       | 0.00558  |
| ENSG00000231205 | ZNF826P   | Zinc finger protein 826, pseudogene                                  | 0.005636 |
| ENSG00000163029 | SMC6      | Structural maintenance of chromosomes 6                              | 0.00584  |
| ENSG00000255561 | FDXACB1   | Ferredoxin-fold anticodon binding domain containing 1                | 0.00584  |
| ENSG00000105185 | PDCD5     | Programmed cell death 5                                              | 0.005919 |
| ENSG00000171492 | LRR8D     | Leucine rich repeat containing 8 VRAC subunit D                      | 0.006052 |
| ENSG00000150556 | LYPD6B    | LY6/PLAUR domain containing 6B                                       | 0.006107 |
| ENSG00000093217 | XYLB      | Xylulokinase                                                         | 0.006208 |
| ENSG00000167088 | SNRPD1    | Small nuclear ribonucleoprotein D1 polypeptide                       | 0.006254 |
| ENSG00000184216 | IRAK1     | Interleukin 1 receptor associated kinase 1                           | 0.006278 |
| ENSG00000105202 | FBL       | Fibrillarin                                                          | 0.006293 |
| ENSG00000175175 | PPM1E     | Protein phosphatase, Mg <sup>2+</sup> /Mn <sup>2+</sup> dependent 1E | 0.006293 |
| ENSG00000167553 | TUBA1C    | Tubulin alpha 1c                                                     | 0.006377 |
| ENSG00000151892 | GFRA1     | GDNF family receptor alpha 1                                         | 0.0064   |

|                 |                 |                                                                  |          |
|-----------------|-----------------|------------------------------------------------------------------|----------|
| ENSG00000105894 | PTN             | Pleiotrophin                                                     | 0.00656  |
| ENSG00000146477 | SLC22A3         | Solute carrier family 22 member 3                                | 0.006666 |
| ENSG00000091986 | CCDC80          | Coiled-coil domain containing 80                                 | 0.006688 |
| ENSG00000156471 | PTDSS1          | Phosphatidylserine synthase 1                                    | 0.006771 |
| ENSG00000258555 | SPECC1L-ADORA2A | SPECC1L-ADORA2A readthrough (NMD candidate)                      | 0.006793 |
| ENSG00000054277 | OPN3            | Opsin 3                                                          | 0.006989 |
| ENSG00000133107 | TRPC4           | Transient receptor potential cation channel subfamily C member 4 | 0.007235 |
| ENSG00000168077 | SCARA3          | Scavenger receptor class A member 3                              | 0.007338 |
| ENSG00000109576 | AADAT           | Amino adipate aminotransferase                                   | 0.007351 |
| ENSG00000121057 | AKAP1           | A-kinase anchoring protein 1                                     | 0.007351 |
| ENSG00000173457 | PPP1R14B        | Protein phosphatase 1 regulatory inhibitor subunit 14B           | 0.007504 |
| ENSG00000116161 | CACYBP          | Calcyclin binding protein                                        | 0.007674 |
| ENSG00000183048 | SLC25A10        | Solute carrier family 25 member 10                               | 0.007754 |
| ENSG00000179104 | TMTC2           | Transmembrane O-mannosyltransferase targeting cadherins 2        | 0.007894 |
| ENSG00000163923 | RPL39L          | Ribosomal protein L39 like                                       | 0.008054 |
| ENSG00000254726 | MEX3A           | Mex-3 RNA binding family member A                                | 0.008054 |
| ENSG00000150753 | CCT5            | Chaperonin containing TCP1 subunit 5                             | 0.008233 |
| ENSG00000143401 | ANP32E          | Acidic nuclear phosphoprotein 32 family member E                 | 0.008518 |
| ENSG00000080200 | CRYBG3          | Crystallin beta-gamma domain containing 3                        | 0.008587 |
| ENSG00000102007 | PLP2            | Proteolipid protein 2                                            | 0.00885  |
| ENSG00000113657 | DPYSL3          | Dihydropyrimidinase like 3                                       | 0.008975 |
| ENSG00000094916 | CBX5            | Chromobox 5                                                      | 0.009082 |
| ENSG00000143942 | CHAC2           | Chac cation transport regulator homolog 2                        | 0.009159 |
| ENSG00000182963 | GJC1            | Gap junction protein gamma 1                                     | 0.009177 |
| ENSG00000109881 | CCDC34          | Coiled-coil domain containing 34                                 | 0.009225 |
| ENSG00000141560 | FN3KRP          | Fructosamine 3 kinase related protein                            | 0.009407 |
| ENSG00000206190 | ATP10A          | Atpase phospholipid transporting 10A (putative)                  | 0.009454 |
| ENSG00000141401 | IMPA2           | Inositol monophosphatase 2                                       | 0.009472 |
| ENSG00000134802 | SLC43A3         | Solute carrier family 43 member 3                                | 0.009642 |
| ENSG00000160229 | ZNF66           | Zinc finger protein 66                                           | 0.009775 |
| ENSG00000111186 | WNT5B           | Wnt family member 5B                                             | 0.009908 |
| ENSG00000089280 | FUS             | FUS RNA binding protein                                          | 0.010213 |
| ENSG00000141569 | TRIM65          | Tripartite motif containing 65                                   | 0.010304 |
| ENSG00000151576 | QTRT2           | Queuine trna-ribosyltransferase accessory subunit 2              | 0.010682 |
| ENSG00000152455 | SUV39H2         | Suppressor of variegation 3-9 homolog 2                          | 0.010727 |
| ENSG00000079156 | OSBPL6          | Oxysterol binding protein like 6                                 | 0.010743 |
| ENSG00000132773 | TOE1            | Target of EGR1, exonuclease                                      | 0.011007 |
| ENSG00000113140 | SPARC           | Secreted protein acidic and cysteine rich                        | 0.011153 |
| ENSG00000011260 | UTP18           | UTP18 small subunit processome component                         | 0.011169 |
| ENSG00000110108 | TMEM109         | Transmembrane protein 109                                        | 0.011329 |
| ENSG00000152503 | TRIM36          | Tripartite motif containing 36                                   | 0.011373 |
| ENSG00000145416 | MARCHF1         | Membrane associated ring-CH-type finger 1                        | 0.011388 |
| ENSG00000133019 | CHRM3           | Cholinergic receptor muscarinic 3                                | 0.011544 |
| ENSG00000145990 | GFOD1           | Glucose-fructose oxidoreductase domain containing 1              | 0.011559 |
| ENSG00000137337 | MDC1            | Mediator of DNA damage checkpoint 1                              | 0.011674 |
| ENSG00000163002 | NUP35           | Nucleoporin 35                                                   | 0.011674 |
| ENSG00000160208 | RRP1B           | Ribosomal RNA processing 1B                                      | 0.011676 |
| ENSG00000068028 | RASSF1          | Ras association domain family member 1                           | 0.011833 |

|                 |          |                                                        |          |
|-----------------|----------|--------------------------------------------------------|----------|
| ENSG00000109099 | PMP22    | Peripheral myelin protein 22                           | 0.011833 |
| ENSG00000127418 | FGFRL1   | Fibroblast growth factor receptor like 1               | 0.011862 |
| ENSG00000136111 | TBC1D4   | TBC1 domain family member 4                            | 0.011862 |
| ENSG00000163006 | CCDC138  | Coiled-coil domain containing 138                      | 0.01196  |
| ENSG00000104064 | GABPB1   | GA binding protein transcription factor subunit beta 1 | 0.011962 |
| ENSG00000214706 | IFRD2    | Interferon related developmental regulator 2           | 0.011962 |
| ENSG00000145934 | TENM2    | Teneurin transmembrane protein 2                       | 0.012074 |
| ENSG00000196950 | SLC39A10 | Solute carrier family 39 member 10                     | 0.012116 |
| ENSG00000145220 | LYAR     | Ly1 antibody reactive                                  | 0.01242  |
| ENSG00000123505 | AMD1     | Adenosylmethionine decarboxylase 1                     | 0.0126   |
| ENSG00000170876 | TMEM43   | Transmembrane protein 43                               | 0.012834 |
| ENSG00000035928 | RFC1     | Replication factor C subunit 1                         | 0.012847 |
| ENSG00000157240 | FZD1     | Frizzled class receptor 1                              | 0.012983 |
| ENSG00000188610 | FAM72B   | Family with sequence similarity 72 member B            | 0.013051 |
| ENSG00000135312 | HTR1B    | 5-hydroxytryptamine receptor 1B                        | 0.013064 |
| ENSG00000144891 | AGTR1    | Angiotensin II receptor type 1                         | 0.013091 |
| ENSG00000166333 | ILK      | Integrin linked kinase                                 | 0.013091 |
| ENSG00000184992 | BRI3BP   | BRI3 binding protein                                   | 0.013144 |
| ENSG00000173848 | NET1     | Neuroepithelial cell transforming 1                    | 0.013441 |
| ENSG00000197646 | PDCD1LG2 | Programmed cell death 1 ligand 2                       | 0.01359  |
| ENSG00000079387 | SENPA1   | SUMO specific peptidase 1                              | 0.014068 |
| ENSG00000180611 | MB21D2   | Mab-21 domain containing 2                             | 0.014119 |
| ENSG00000144824 | PHLDB2   | Pleckstrin homology like domain family B member 2      | 0.014158 |
| ENSG00000120256 | LRP11    | LDL receptor related protein 11                        | 0.014384 |
| ENSG00000162433 | AK4      | Adenylate kinase 4                                     | 0.014434 |
| ENSG00000135480 | KRT7     | Keratin 7                                              | 0.014483 |
| ENSG00000254093 | PINX1    | PIN2 (TERF1) interacting telomerase inhibitor 1        | 0.014548 |
| ENSG00000129484 | PARP2    | Poly(ADP-ribose) polymerase 2                          | 0.014768 |
| ENSG00000188641 | DPYD     | Dihydropyrimidine dehydrogenase                        | 0.014976 |
| ENSG00000185298 | CCDC137  | Coiled-coil domain containing 137                      | 0.015262 |
| ENSG00000187231 | SESTD1   | SEC14 and spectrin domain containing 1                 | 0.015309 |
| ENSG00000198478 | SH3BGL2  | SH3 domain binding glutamate rich protein like 2       | 0.015309 |
| ENSG00000099783 | HNRNPM   | Heterogeneous nuclear ribonucleoprotein M              | 0.015399 |
| ENSG00000205659 | LIN52    | Lin-52 DREAM muvb core complex component               | 0.015436 |
| ENSG00000119900 | OGFRL1   | Opioid growth factor receptor like 1                   | 0.015657 |
| ENSG00000153993 | SEMA3D   | Semaphorin 3D                                          | 0.016038 |
| ENSG00000130204 | TOMM40   | Translocase of outer mitochondrial membrane 40         | 0.016145 |
| ENSG00000206053 | JPT2     | Jupiter microtubule associated homolog 2               | 0.016337 |
| ENSG00000117394 | SLC2A1   | Solute carrier family 2 member 1                       | 0.016616 |
| ENSG00000188529 | SRSF10   | Serine and arginine rich splicing factor 10            | 0.016616 |
| ENSG00000183722 | LHFPL6   | LHFPL tetraspan subfamily member 6                     | 0.016625 |
| ENSG00000175768 | TOMM5    | Translocase of outer mitochondrial membrane 5          | 0.016747 |
| ENSG00000111331 | OAS3     | 2'-5'-oligoadenylate synthetase 3                      | 0.016755 |
| ENSG00000121775 | TMEM39B  | Transmembrane protein 39B                              | 0.016764 |
| ENSG00000153976 | HS3ST3A1 | Heparan sulfate-glucosamine 3-sulfotransferase 3A1     | 0.017014 |
| ENSG00000171649 | ZIK1     | Zinc finger protein interacting with K protein 1       | 0.017023 |
| ENSG00000006625 | GGCT     | Gamma-glutamylcyclotransferase                         | 0.017143 |
| ENSG00000010292 | NCAPD2   | Non-SMC condensin I complex subunit D2                 | 0.017373 |
| ENSG00000168476 | REEP4    | Receptor accessory protein 4                           | 0.017433 |
| ENSG00000124784 | RIOK1    | RIO kinase 1                                           | 0.017833 |
| ENSG00000156265 | MAP3K7CL | MAP3K7 C-terminal like                                 | 0.0182   |

|                 |            |                                                                      |          |
|-----------------|------------|----------------------------------------------------------------------|----------|
| ENSG00000133863 | TEX15      | Testis expressed 15, meiosis and synapsis associated                 | 0.018214 |
| ENSG00000119537 | KDSR       | 3-ketodihydrosphingosine reductase                                   | 0.018318 |
| ENSG00000136938 | ANP32B     | Acidic nuclear phosphoprotein 32 family member B                     | 0.018434 |
| ENSG00000169689 | CENPX      | Centromere protein X                                                 | 0.018434 |
| ENSG00000004777 | ARHGAP33   | Rho gtpase activating protein 33                                     | 0.018441 |
| ENSG00000188985 | DHFRP1     | Dihydrofolate reductase pseudogene 1                                 | 0.018448 |
| ENSG00000186918 | ZNF395     | Zinc finger protein 395                                              | 0.01848  |
| ENSG00000174600 | CMKLR1     | Chemerin chemokine-like receptor 1                                   | 0.01862  |
| ENSG00000196368 | NUDT11     | Nudix hydrolase 11                                                   | 0.018652 |
| ENSG00000150990 | DHX37      | DEAH-box helicase 37                                                 | 0.018734 |
| ENSG00000185697 | MYBL1      | MYB proto-oncogene like 1                                            | 0.018917 |
| ENSG00000244067 | GSTA2      | Glutathione S-transferase alpha 2                                    | 0.018923 |
| ENSG00000100664 | EIF5       | Eukaryotic translation initiation factor 5                           | 0.019011 |
| ENSG00000198959 | TGM2       | Transglutaminase 2                                                   | 0.019042 |
| ENSG00000118620 | ZNF430     | Zinc finger protein 430                                              | 0.019286 |
| ENSG00000197785 | ATAD3A     | Atpase family AAA domain containing 3A                               | 0.019473 |
| ENSG00000180801 | ARSJ       | Arylsulfatase family member J                                        | 0.019503 |
| ENSG00000102967 | DHODH      | Dihydroorotate dehydrogenase (quinone)                               | 0.019559 |
| ENSG00000134987 | WDR36      | WD repeat domain 36                                                  | 0.019636 |
| ENSG00000148459 | PDSS1      | Decaprenyl diphosphate synthase subunit 1                            | 0.019636 |
| ENSG00000125863 | MKKS       | Mckusick-Kaufman syndrome                                            | 0.019636 |
| ENSG00000170802 | FOXN2      | Forkhead box N2                                                      | 0.019636 |
| ENSG00000256663 | AC112777.1 | Ubiquitin-like with PHD and ring finger domains 1 (UHRF1) pseudogene | 0.019746 |
| ENSG00000136159 | NUDT15     | Nudix hydrolase 15                                                   | 0.019801 |
| ENSG00000213397 | HAUS7      | HAUS augmin like complex subunit 7                                   | 0.019831 |
| ENSG00000145293 | ENOPH1     | Enolase-phosphatase 1                                                | 0.020034 |
| ENSG00000106348 | IMPDH1     | Inosine monophosphate dehydrogenase 1                                | 0.020344 |
| ENSG00000166582 | CENPV      | Centromere protein V                                                 | 0.020673 |
| ENSG00000075142 | SRI        | Sorcin                                                               | 0.020801 |
| ENSG00000112365 | ZBTB24     | Zinc finger and BTB domain containing 24                             | 0.020977 |
| ENSG00000173085 | COQ2       | Coenzyme Q2, polyprenyltransferase                                   | 0.021454 |
| ENSG00000103404 | USP31      | Ubiquitin specific peptidase 31                                      | 0.021506 |
| ENSG00000187790 | FANCM      | FA complementation group M                                           | 0.021687 |
| ENSG00000172167 | MTBP       | MDM2 binding protein                                                 | 0.022129 |
| ENSG00000111788 | AC009533.1 | DEAD/H (Asp-Glu-Ala-Asp/His) box polypeptide like pseudogene         | 0.022278 |
| ENSG00000164619 | BMPER      | BMP binding endothelial regulator                                    | 0.022308 |
| ENSG00000116667 | C1orf21    | Chromosome 1 open reading frame 21                                   | 0.022407 |
| ENSG00000153048 | CARHSP1    | Calcium regulated heat stable protein 1                              | 0.02256  |
| ENSG00000167460 | TPM4       | Tropomyosin 4                                                        | 0.022708 |
| ENSG00000144395 | CCDC150    | Coiled-coil domain containing 150                                    | 0.022932 |
| ENSG00000103121 | CMC2       | C-X9-C motif containing 2                                            | 0.023199 |
| ENSG00000131462 | TUBG1      | Tubulin gamma 1                                                      | 0.023226 |
| ENSG00000145375 | SPATA5     | Spermatogenesis associated 5                                         | 0.023396 |
| ENSG00000152402 | GUCY1A2    | Guanylate cyclase 1 soluble subunit alpha 2                          | 0.023398 |
| ENSG00000119335 | SET        | SET nuclear proto-oncogene                                           | 0.0234   |
| ENSG00000253250 | C8orf88    | Chromosome 8 open reading frame 88                                   | 0.023473 |
| ENSG00000095319 | NUP188     | Nucleoporin 188                                                      | 0.023811 |
| ENSG00000120253 | NUP43      | Nucleoporin 43                                                       | 0.02403  |
| ENSG00000142149 | HUNK       | Hormonally up-regulated Neu-associated kinase                        | 0.02403  |

|                 |            |                                                           |          |
|-----------------|------------|-----------------------------------------------------------|----------|
| ENSG00000157483 | MYO1E      | Myosin IE                                                 | 0.02403  |
| ENSG00000184900 | SUMO3      | Small ubiquitin like modifier 3                           | 0.02403  |
| ENSG00000100522 | GNPNAT1    | Glucosamine-phosphate N-acetyltransferase 1               | 0.024368 |
| ENSG00000174136 | RGMB       | Repulsive guidance molecule BMP co-receptor b             | 0.024368 |
| ENSG00000122565 | CBX3       | Chromobox 3                                               | 0.024558 |
| ENSG00000165197 | VEGFD      | Vascular endothelial growth factor D                      | 0.024558 |
| ENSG00000176887 | SOX11      | SRY-box transcription factor 11                           | 0.024771 |
| ENSG00000092621 | PHGDH      | Phosphoglycerate dehydrogenase                            | 0.02496  |
| ENSG00000131652 | THOC6      | THO complex 6                                             | 0.02496  |
| ENSG00000105968 | H2AZ2      | H2A.Z variant histone 2                                   | 0.025102 |
| ENSG00000136108 | CKAP2      | Cytoskeleton associated protein 2                         | 0.025102 |
| ENSG00000148120 | AOPEP      | Aminopeptidase O (putative)                               | 0.025102 |
| ENSG00000171067 | C11orf24   | Chromosome 11 open reading frame 24                       | 0.025102 |
| ENSG00000140451 | PIF1       | PIF1 5'-to-3' DNA helicase                                | 0.025452 |
| ENSG00000174827 | PDZK1      | PDZ domain containing 1                                   | 0.025452 |
| ENSG00000179958 | DCTPP1     | Dctp pyrophosphatase 1                                    | 0.025452 |
| ENSG00000139350 | NEDD1      | NEDD1 gamma-tubulin ring complex targeting factor         | 0.026216 |
| ENSG00000149596 | JPH2       | Junctophilin 2                                            | 0.026216 |
| ENSG00000167775 | CD320      | CD320 molecule                                            | 0.026216 |
| ENSG00000130402 | ACTN4      | Actinin alpha 4                                           | 0.026375 |
| ENSG00000154127 | UBASH3B    | Ubiquitin associated and SH3 domain containing B          | 0.026375 |
| ENSG00000137547 | MRPL15     | Mitochondrial ribosomal protein L15                       | 0.026558 |
| ENSG00000178531 | CTXN1      | Cortexin 1                                                | 0.026558 |
| ENSG00000131019 | ULBP3      | UL16 binding protein 3                                    | 0.02697  |
| ENSG00000139211 | AMIGO2     | Adhesion molecule with Ig like domain 2                   | 0.027176 |
| ENSG00000134779 | TPGS2      | Tubulin polyglutamylase complex subunit 2                 | 0.027356 |
| ENSG00000158716 | DUSP23     | Dual specificity phosphatase 23                           | 0.027356 |
| ENSG00000051596 | THOC3      | THO complex 3                                             | 0.027561 |
| ENSG00000011332 | DPF1       | Double PHD fingers 1                                      | 0.027765 |
| ENSG00000148926 | ADM        | Adrenomedullin                                            | 0.027893 |
| ENSG00000142230 | SAE1       | SUMO1 activating enzyme subunit 1                         | 0.028045 |
| ENSG00000121210 | TMEM131L   | Transmembrane 131 like                                    | 0.028222 |
| ENSG00000182054 | IDH2       | Isocitrate dehydrogenase (NADP(+)) 2                      | 0.028398 |
| ENSG00000188229 | TUBB4B     | Tubulin beta 4B class ivb                                 | 0.0288   |
| ENSG00000242265 | PEG10      | Paternally expressed 10                                   | 0.0288   |
| ENSG00000166002 | SMCO4      | Single-pass membrane protein with coiled-coil domains 4   | 0.028923 |
| ENSG00000196730 | DAPK1      | Death associated protein kinase 1                         | 0.028923 |
| ENSG00000160214 | RRP1       | Ribosomal RNA processing 1                                | 0.029097 |
| ENSG00000102271 | KLHL4      | Kelch like family member 4                                | 0.029244 |
| ENSG00000135801 | TAF5L      | TATA-box binding protein associated factor 5 like         | 0.029244 |
| ENSG00000055044 | NOP58      | NOP58 ribonucleoprotein                                   | 0.02939  |
| ENSG00000198142 | SOWAHC     | Sosondowah ankyrin repeat domain family member C          | 0.02939  |
| ENSG00000139263 | LRIG3      | Leucine rich repeats and immunoglobulin like domains 3    | 0.029759 |
| ENSG00000108468 | CBX1       | Chromobox 1                                               | 0.030687 |
| ENSG00000156509 | FBXO43     | F-box protein 43                                          | 0.030687 |
| ENSG00000153885 | KCTD15     | Potassium channel tetramerization domain containing 15    | 0.030882 |
| ENSG00000198924 | DCLRE1A    | DNA cross-link repair 1A                                  | 0.031077 |
| ENSG00000227120 | AC009238.1 | Pseudogene similar to part of Cdon homolog (mouse) (CDON) | 0.031382 |
| ENSG00000124787 | RPP40      | Ribonuclease P/MRP subunit p40                            | 0.03152  |
| ENSG00000147224 | PRPS1      | Phosphoribosyl pyrophosphate synthetase 1                 | 0.03152  |



|                 |          |                                                                    |          |
|-----------------|----------|--------------------------------------------------------------------|----------|
| ENSG00000172009 | THOP1    | Thimet oligopeptidase 1                                            | 0.03152  |
| ENSG00000128641 | MYO1B    | Myosin IB                                                          | 0.031822 |
| ENSG00000112276 | BVES     | Blood vessel epicardial substance                                  | 0.031985 |
| ENSG00000173638 | SLC19A1  | Solute carrier family 19 member 1                                  | 0.031985 |
| ENSG00000126216 | TUBGCP3  | Tubulin gamma complex associated protein 3                         | 0.032148 |
| ENSG00000075461 | CACNG4   | Calcium voltage-gated channel auxiliary subunit gamma 4            | 0.032283 |
| ENSG00000107371 | EXOSC3   | Exosome component 3                                                | 0.032283 |
| ENSG00000174013 | FBXO45   | F-box protein 45                                                   | 0.032283 |
| ENSG00000182173 | TSEN54   | Trna splicing endonuclease subunit 54                              | 0.033287 |
| ENSG00000105855 | ITGB8    | Integrin subunit beta 8                                            | 0.033476 |
| ENSG00000172732 | MUS81    | MUS81 structure-specific endonuclease subunit                      | 0.033664 |
| ENSG00000127334 | DYRK2    | Dual specificity tyrosine phosphorylation regulated kinase 2       | 0.03463  |
| ENSG00000131773 | KHDRBS3  | KH RNA binding domain containing, signal transduction associated 3 | 0.035003 |
| ENSG00000151388 | ADAMTS12 | ADAM metallopeptidase with thrombospondin type 1 motif 12          | 0.035314 |
| ENSG00000171960 | PPIH     | Peptidylprolyl isomerase H                                         | 0.035314 |
| ENSG00000172059 | KLF11    | Kruppel like factor 11                                             | 0.035684 |
| ENSG00000122861 | PLAU     | Plasminogen activator, urokinase                                   | 0.036481 |
| ENSG00000178776 | C5orf46  | Chromosome 5 open reading frame 46                                 | 0.036664 |
| ENSG00000114686 | MRPL3    | Mitochondrial ribosomal protein L3                                 | 0.036754 |
| ENSG00000117152 | RGS4     | Regulator of G protein signaling 4                                 | 0.036754 |
| ENSG00000125148 | MT2A     | Metallothionein 2A                                                 | 0.036754 |
| ENSG00000101574 | METTL4   | Methyltransferase like 4                                           | 0.036873 |
| ENSG00000137801 | THBS1    | Thrombospondin 1                                                   | 0.036993 |
| ENSG00000164167 | LSM6     | LSM6 homolog, U6 small nuclear RNA and mrna degradation associated | 0.036993 |
| ENSG00000198890 | PRMT6    | Protein arginine methyltransferase 6                               | 0.036993 |
| ENSG00000234571 | H2BP2    | H2B histone pseudogene 2                                           | 0.037386 |
| ENSG00000101220 | C20orf27 | Chromosome 20 open reading frame 27                                | 0.037472 |
| ENSG00000130520 | LSM4     | LSM4 homolog, U6 small nuclear RNA and mrna degradation associated | 0.037472 |
| ENSG00000136243 | NUP42    | Nucleoporin 42                                                     | 0.037472 |
| ENSG00000118894 | EEF2KMT  | Eukaryotic elongation factor 2 lysine methyltransferase            | 0.037495 |
| ENSG00000138356 | AOX1     | Aldehyde oxidase 1                                                 | 0.037495 |
| ENSG00000165175 | MID1IP1  | MID1 interacting protein 1                                         | 0.037495 |
| ENSG00000178031 | ADAMTSL1 | ADAMTS like 1                                                      | 0.037495 |
| ENSG00000064666 | CNN2     | Calponin 2                                                         | 0.037611 |
| ENSG00000070404 | FSTL3    | Follistatin like 3                                                 | 0.037611 |
| ENSG00000114450 | GNB4     | G protein subunit beta 4                                           | 0.037905 |
| ENSG00000155189 | AGPAT5   | 1-acylglycerol-3-phosphate O-acyltransferase 5                     | 0.038019 |
| ENSG00000128944 | KNSTRN   | Kinetochores localized astrin (SPAG5) binding protein              | 0.038133 |
| ENSG00000125458 | NT5C     | 5', 3'-nucleotidase, cytosolic                                     | 0.038215 |
| ENSG00000125753 | VASP     | Vasodilator stimulated phosphoprotein                              | 0.038215 |
| ENSG00000117411 | B4GALT2  | Beta-1,4-galactosyltransferase 2                                   | 0.038359 |
| ENSG00000178860 | MSC      | Musculin                                                           | 0.038359 |
| ENSG00000117228 | GBP1     | Guanylate binding protein 1                                        | 0.038535 |
| ENSG00000129474 | AJUBA    | Ajuba LIM protein                                                  | 0.038853 |
| ENSG00000163655 | GMPS     | Guanine monophosphate synthase                                     | 0.038996 |

|                 |            |                                                                                  |          |
|-----------------|------------|----------------------------------------------------------------------------------|----------|
| ENSG00000130921 | C12orf65   | Chromosome 12 open reading frame 65                                              | 0.039659 |
| ENSG00000198168 | SVIP       | Small VCP interacting protein                                                    | 0.040004 |
| ENSG00000148484 | RSU1       | Ras suppressor protein 1                                                         | 0.040382 |
| ENSG00000115241 | PPM1G      | Protein phosphatase, Mg <sup>2+</sup> /Mn <sup>2+</sup> dependent 1G             | 0.040455 |
| ENSG00000166483 | WEE1       | WEE1 G2 checkpoint kinase                                                        | 0.040455 |
| ENSG00000173218 | VANGL1     | VANGL planar cell polarity protein 1                                             | 0.040626 |
| ENSG00000155368 | DBI        | Diazepam binding inhibitor, acyl-coa binding protein                             | 0.040797 |
| ENSG00000121690 | DEPDC7     | DEP domain containing 7                                                          | 0.041276 |
| ENSG00000123843 | C4BPB      | Complement component 4 binding protein beta                                      | 0.041276 |
| ENSG00000284989 | AL451062.4 | Novel transcript                                                                 | 0.041445 |
| ENSG00000197837 | H4-16      | H4 histone 16                                                                    | 0.041751 |
| ENSG00000111885 | MAN1A1     | Mannosidase alpha class 1A member 1                                              | 0.041852 |
| ENSG00000273213 | H3-2       | H3.2 histone (putative)                                                          | 0.041852 |
| ENSG00000125630 | POLR1B     | RNA polymerase I subunit B                                                       | 0.042323 |
| ENSG00000091436 | MAP3K20    | Mitogen-activated protein kinase kinase kinase 20                                | 0.042589 |
| ENSG00000106366 | SERPINE1   | Serpin family E member 1                                                         | 0.042589 |
| ENSG00000106399 | RPA3       | Replication protein A3                                                           | 0.042756 |
| ENSG00000105676 | ARMC6      | Armadillo repeat containing 6                                                    | 0.043089 |
| ENSG00000170854 | RIOX2      | Ribosomal oxygenase 2                                                            | 0.043089 |
| ENSG00000071282 | LMCD1      | LIM and cysteine rich domains 1                                                  | 0.043221 |
| ENSG00000167552 | TUBA1A     | Tubulin alpha 1a                                                                 | 0.043221 |
| ENSG00000177192 | PUS1       | Pseudouridine synthase 1                                                         | 0.043517 |
| ENSG00000181938 | GINS3      | GINS complex subunit 3                                                           | 0.043517 |
| ENSG00000184207 | PGP        | Phosphoglycolate phosphatase                                                     | 0.043517 |
| ENSG00000169683 | LRRC45     | Leucine rich repeat containing 45                                                | 0.043682 |
| ENSG00000285130 | AL358113.1 | Novel protein                                                                    | 0.044011 |
| ENSG00000213390 | ARHGAP19   | Rho gtpase activating protein 19                                                 | 0.044339 |
| ENSG00000125266 | EFNB2      | Ephrin B2                                                                        | 0.04483  |
| ENSG00000120708 | TGFB1      | Transforming growth factor beta induced                                          | 0.044957 |
| ENSG00000084774 | CAD        | Carbamoyl-phosphate synthetase 2, aspartate transcarbamylase, and dihydroorotase | 0.045246 |
| ENSG00000086848 | ALG9       | ALG9 alpha-1,2-mannosyltransferase                                               | 0.045246 |
| ENSG00000128510 | CPA4       | Carboxypeptidase A4                                                              | 0.045246 |
| ENSG00000147050 | KDM6A      | Lysine demethylase 6A                                                            | 0.045373 |
| ENSG00000151835 | SACS       | Sacsin molecular chaperone                                                       | 0.045373 |
| ENSG00000141556 | TBCD       | Tubulin folding cofactor D                                                       | 0.045499 |
| ENSG00000169684 | CHRNA5     | Cholinergic receptor nicotinic alpha 5 subunit                                   | 0.045499 |
| ENSG00000168003 | SLC3A2     | Solute carrier family 3 member 2                                                 | 0.045857 |
| ENSG00000119599 | DCAF4      | DDB1 and CUL4 associated factor 4                                                | 0.046142 |
| ENSG00000143554 | SLC27A3    | Solute carrier family 27 member 3                                                | 0.046142 |
| ENSG00000138772 | ANXA3      | Annexin A3                                                                       | 0.046302 |
| ENSG00000019549 | SNAI2      | Snail family transcriptional repressor 2                                         | 0.046477 |
| ENSG00000182197 | EXT1       | Exostosin glycosyltransferase 1                                                  | 0.046477 |
| ENSG00000137656 | BUD13      | BUD13 homolog                                                                    | 0.0466   |
| ENSG00000130810 | PPAN       | Peter pan homolog                                                                | 0.046759 |
| ENSG00000143314 | MRPL24     | Mitochondrial ribosomal protein L24                                              | 0.047076 |
| ENSG00000182240 | BACE2      | Beta-secretase 2                                                                 | 0.047392 |
| ENSG00000163110 | PDLIM5     | PDZ and LIM domain 5                                                             | 0.047549 |
| ENSG00000141858 | SAMD1      | Sterile alpha motif domain containing 1                                          | 0.048222 |
| ENSG00000186603 | HPDL       | 4-hydroxyphenylpyruvate dioxygenase like                                         | 0.048222 |
| ENSG00000204856 | FAM216A    | Family with sequence similarity 216 member A                                     | 0.048222 |

|                 |          |                                                                          |          |
|-----------------|----------|--------------------------------------------------------------------------|----------|
| ENSG00000050344 | NFE2L3   | Nuclear factor, erythroid 2 like 3                                       | 0.048497 |
| ENSG00000198796 | ALPK2    | Alpha kinase 2                                                           | 0.048962 |
| ENSG00000038295 | TLL1     | Tolloid like 1                                                           | 0.049079 |
| ENSG00000117395 | EBNA1BP2 | EBNA1 binding protein 2                                                  | 0.049233 |
| ENSG00000101464 | PIGU     | Phosphatidylinositol glycan anchor biosynthesis class U                  | 0.049772 |
| ENSG00000247077 | PGAM5    | PGAM family member 5, mitochondrial serine/threonine protein phosphatase | 0.049772 |
| ENSG00000138668 | HNRNPD   | Heterogeneous nuclear ribonucleoprotein D                                | 0.049887 |
| ENSG00000197977 | ELOVL2   | ELOVL fatty acid elongase 2                                              | 0.049887 |
